# Supplementary material for: Forest floor temperature and greenness link significantly to canopy attributes in South Africa’s fragmented coastal forests
Source: PeerJ. 2019 Jan 10;7:e6190. doi: 10.7717/peerj.6190 (PMC6330204; doi:10.7717/peerj.6190)
Supplement: Supplemental Information 1 [file peerj-07-6190-s001.csv]

	plot	code	sample	Biome	filename	nav1	nmedian1	nsd1	nmax1	nmin1	nn1	filename_nhs	nav_s	nmed_s	nsd_s	nmax_s	nmin_s	nn_s	filenames_th	tav	tmedian	tsd	tmax	tmin	tn	tav1	tmedian1	tsd1	tmax1	tmin1	tn1	file_nhe	FCover	Vegetation	Habitat
1	Plot23	Plot23_S01	S01	Grassland	2018_0413_075024_S01_G_CALIBRATED.JPG	0.802583593	0.8125	0.105164766	1	-1	4218364	NA	NA	NA	NA	NA	NA	NA	Record_2018-04-13_07-57-S01.csv	21.67085378	21.66	0.529875896	24.35	20.17	22500	22.19387028	22.13	0.731741236	25.34	20.17	58050	NA	NA	Natural grassland	Grassland
2	Plot23	Plot23_S02	S02	Grassland	2018_0413_075059_S02_G_CALIBRATED.JPG	0.823611692	0.830508475	0.103035287	1	-1	3751689	NA	NA	NA	NA	NA	NA	NA	Record_2018-04-13_07-58-S02.csv	21.62849733	21.52	0.690526438	24.16	20.2	22500	21.82650836	21.72	0.753587518	26.98	20.11	66834	NA	NA	Natural grassland	Grassland
3	Plot23	Plot23_S03	S03	Grassland	2018_0413_075124_S03_G_CALIBRATED.JPG	0.789672646	0.796610169	0.113973004	1	-1	4675404	NA	NA	NA	NA	NA	NA	NA	Record_2018-04-13_07-58-S03.csv	22.52747467	22.49	0.606931864	26.01	20.85	22500	22.57257519	22.63	0.443134455	24.27	20.85	36642	NA	NA	Natural grassland	Grassland
4	Plot23	Plot23_S04	S04	Grassland	2018_0413_075003_S04_G_CALIBRATED.JPG	0.750968822	0.756097561	0.122780917	1	-0.5625	4724976	NA	NA	NA	NA	NA	NA	NA	Record_2018-04-13_07-56-S04.csv	21.97308444	21.99	0.445039843	23.62	20.71	22500	22.38208397	22.41	0.603649771	25.29	20.71	51282	NA	NA	Natural grassland	Grassland
5	Plot23	Plot23_S05	S05	Grassland	2018_0413_074948_S05_G_CALIBRATED.JPG	0.768367233	0.777777778	0.11817788	1	-1	3916520	NA	NA	NA	NA	NA	NA	NA	Record_2018-04-13_07-56-S05.csv	22.34648444	22.44	0.472614124	23.97	20.85	22500	22.71938858	22.74	0.523723166	24.38	20.85	59664	NA	NA	Natural grassland	Grassland
6	Plot26	Plot26_S01	S01	Grassland	2018_0413_085042_S01_G_CALIBRATED.JPG	-0.258796418	-0.244094488	0.261423804	1	-1	3561657	NA	NA	NA	NA	NA	NA	NA	Record_2018-04-13_08-56-S01.csv	25.25255911	25.26	0.532052668	27.92	23.04	22500	25.47589379	25.48	0.594801055	30.46	23.04	50616	NA	NA	Natural grassland	Grassland
7	Plot26	Plot26_S02	S02	Grassland	2018_0413_084902_S02_G_CALIBRATED.JPG	-0.266860133	-0.246153846	0.247268028	1	-1	3163539	NA	NA	NA	NA	NA	NA	NA	Record_2018-04-13_08-55-S02.csv	25.35017689	25.42	0.64890321	27.87	22.63	22500	25.68775054	25.64	0.834928975	31.24	22.63	48336	NA	NA	Natural grassland	Grassland
8	Plot26	Plot26_S03	S03	Grassland	2018_0413_084956_S03_G_CALIBRATED.JPG	-0.273266481	-0.241590214	0.217536038	1	-1	3559198	NA	NA	NA	NA	NA	NA	NA	Record_2018-04-13_08-56-S03.csv	25.66383422	25.66	0.425970504	27.87	23.73	22500	25.44255459	25.53	0.512746202	27.87	23.4	66856	NA	NA	Natural grassland	Grassland
9	Plot26	Plot26_S04	S04	Grassland	2018_0413_085015_S04_G_CALIBRATED.JPG	-0.258177152	-0.234567901	0.275434094	1	-1	3684290	NA	NA	NA	NA	NA	NA	NA	Record_2018-04-13_08-56-S04.csv	26.08037867	26.09	0.951644261	29.77	22.77	22500	26.32588777	26.4	0.784485668	29.77	23.04	56563	NA	NA	Natural grassland	Grassland
10	Plot26	Plot26_S05	S05	Grassland	2018_0413_084833_S05_G_CALIBRATED.JPG	-0.27199958	-0.240740741	0.250361364	1	-1	4511464	NA	NA	NA	NA	NA	NA	NA	Record_2018-04-13_08-55-S05.csv	24.99787778	24.97	0.38410535	27.35	23.59	22500	25.01325701	25	0.477767162	27.77	23.18	47344	NA	NA	Natural grassland	Grassland
11	Plot29	Plot29_S01	S01	Grassland	2018_0413_100405_S01_G_CALIBRATED.JPG	0.806726553	0.826086957	0.098218995	1	-0.92	3728416	NA	NA	NA	NA	NA	NA	NA	Record_2018-04-13_10-10-S01.csv	27.00309956	26.98	0.741254633	30.15	24.32	22500	27.20153508	27.17	1.210027438	31.81	23.4	56160	NA	NA	Natural grassland	Grassland
12	Plot29	Plot29_S02	S02	Grassland	2018_0413_100424_S02_G_CALIBRATED.JPG	0.777490753	0.795918367	0.098808836	1	-0.375	4210305	NA	NA	NA	NA	NA	NA	NA	Record_2018-04-13_10-10-S02.csv	27.43561733	27.48	0.511210149	29.47	25.29	22500	27.70325474	27.66	0.673318592	30.36	25.29	57510	NA	NA	Natural grassland	Grassland
13	Plot29	Plot29_S03	S03	Grassland	2018_0413_100458_S03_G_CALIBRATED.JPG	0.80023519	0.815789474	0.087332911	1	-0.689655172	3774100	NA	NA	NA	NA	NA	NA	NA	Record_2018-04-13_10-10-S03.csv	27.71322667	27.66	0.657275277	29.85	25.82	22500	27.46754428	27.48	0.612087709	29.87	24.7	66677	NA	NA	Natural grassland	Grassland
14	Plot29	Plot29_S04	S04	Grassland	2018_0413_100514_S04_G_CALIBRATED.JPG	0.785283622	0.80952381	0.100804415	1	-0.391304348	4104912	NA	NA	NA	NA	NA	NA	NA	Record_2018-04-13_10-11-S04.csv	26.45851289	26.43	0.480567331	29.03	23.94	22500	26.62990957	26.59	0.528688976	29.44	23.59	63474	NA	NA	Natural grassland	Grassland
15	Plot29	Plot29_S05	S05	Grassland	2018_0413_100338_S05_G_CALIBRATED.JPG	0.820773447	0.837837838	0.087234595	1	-0.567567568	3383238	NA	NA	NA	NA	NA	NA	NA	Record_2018-04-13_10-09-S05.csv	28.20554578	28.18	0.683672521	31.64	25.72	22500	28.09030981	28.05	0.581841472	31.64	25.72	66816	NA	NA	Natural grassland	Grassland
16	Plot32	Plot32_S01	S01	Grassland	2018_0413_111539_S01_G_CALIBRATED.JPG	0.717685009	0.730769231	0.112443549	1	0.1	3933765	NA	NA	NA	NA	NA	NA	NA	Record_2018-04-13_11-22-S01.csv	28.57706489	28.57	0.455412251	31.01	26.85	22500	28.42698919	28.39	0.512575503	30.63	14.48	40700	NA	NA	Natural grassland	Grassland
17	Plot32	Plot32_S02	S02	Grassland	2018_0413_111559_S02_G_CALIBRATED.JPG	0.704491543	0.714285714	0.116816748	1	-0.6	3740340	NA	NA	NA	NA	NA	NA	NA	Record_2018-04-13_11-24-S02.csv	29.827024	29.59	1.20461662	38.46	26.03	22500	29.37404038	29.36	1.078463152	38.46	26.09	61712	NA	NA	Natural grassland	Grassland
18	Plot32	Plot32_S03	S03	Grassland	2018_0413_111613_S03_G_CALIBRATED.JPG	0.730443482	0.737704918	0.101182831	1	-0.449612403	3797758	NA	NA	NA	NA	NA	NA	NA	Record_2018-04-13_11-25-S03.csv	28.68742667	28.72	0.539063838	31.31	25.9	22500	28.80089927	28.85	0.599682563	32.18	25.66	64630	NA	NA	Natural grassland	Grassland
19	Plot32	Plot32_S04	S04	Grassland	2018_0413_111626_S04_G_CALIBRATED.JPG	0.761856365	0.78313253	0.097680853	1	-0.5	3948295	NA	NA	NA	NA	NA	NA	NA	Record_2018-04-13_11-25-S04.csv	28.61768578	28.47	1.189249999	34.39	25	22500	28.23440874	28.21	0.923008307	34.39	24.91	46308	NA	NA	Natural grassland	Grassland
20	Plot32	Plot32_S05	S05	Grassland	2018_0413_111520_S05_G_CALIBRATED.JPG	0.678130334	0.694915254	0.127580815	1	-0.455938697	3800457	NA	NA	NA	NA	NA	NA	NA	Record_2018-04-13_11-21-S05.csv	27.27315733	27.32	0.569433807	29.03	25.48	22500	27.53286521	27.58	0.655469182	29.92	25.48	50820	NA	NA	Natural grassland	Grassland
21	Plot33	Plot33_S01	S01	Grassland	2018_0415_090938_002_CALIBRATED.JPG	0.568339008	0.582417582	0.130837482	0.943661972	-0.064935065	4389452	NA	NA	NA	NA	NA	NA	NA	Record_2018-04-15_09-16-41-S01.csv	31.05279556	30.88	1.251899528	38.62	27.82	22500	30.91613742	30.76	1.301193564	38.62	27.38	60879	NA	NA	Grassland degraded within bush	Grassland
22	Plot33	Plot33_S02	S02	Grassland	2018_0415_090958_004_CALIBRATED.JPG	0.521285933	0.540229885	0.173665299	1	-0.19047619	3720080	NA	NA	NA	NA	NA	NA	NA	Record_2018-04-15_09-17-03-S02.csv	29.01946267	29.01	1.217700459	33.27	26.56	22500	28.6059416	28.34	1.185052547	34.92	26.4	78489	NA	NA	Grassland degraded within bush	Grassland
23	Plot33	Plot33_S03	S03	Grassland	2018_0415_091018_006_CALIBRATED.JPG	0.567960192	0.586206897	0.148347811	1	-0.088235294	4449258	NA	NA	NA	NA	NA	NA	NA	Record_2018-04-15_09-17-30-S03.csv	28.88315956	28.78	0.719903356	32.8	26.56	22500	29.93469829	29.57	1.505658416	36.47	10.24	59328	NA	NA	Grassland degraded within bush	Grassland
24	Plot33	Plot33_S04	S04	Grassland	2018_0415_091035_008_CALIBRATED.JPG	0.526331706	0.529411765	0.142762454	1	-0.105882353	4222256	NA	NA	NA	NA	NA	NA	NA	Record_2018-04-15_09-17-49-S04.csv	29.62951333	29.49	0.977745401	33.97	26.96	22500	30.03748331	29.82	1.109305797	35.92	27.32	64120	NA	NA	Grassland degraded within bush	Grassland
25	Plot33	Plot33_S05	S05	Grassland	2018_0415_091054_010_CALIBRATED.JPG	0.370475804	0.348837209	0.172816781	1	-0.137931034	3769254	NA	NA	NA	NA	NA	NA	NA	Record_2018-04-15_09-18-11-S05.csv	29.552592	29.44	1.14188991	34.19	26.51	22500	29.80302597	29.67	1.287276864	37.29	21.99	77671	NA	NA	Grassland degraded within bush	Grassland
26	Plot5	Plot5_S01	S01	Grassland	2018_0411_115821_S01_G_CALIBRATED.JPG	0.657917942	0.677419355	0.107659874	1	-0.639344262	3518004	NA	NA	NA	NA	NA	NA	NA	Record_2018-04-11_12-06-S01.csv	35.70896711	35.66	2.056735305	44.91	30.48	22500	35.17725535	35.25	2.250692789	43.44	29.47	45780	NA	NA	Natural grassland	Grassland
27	Plot5	Plot5_S02	S02	Grassland	2018_0411_115853_S02_G_CALIBRATED.JPG	0.688181106	0.703703704	0.101372665	1	-0.52238806	3552120	NA	NA	NA	NA	NA	NA	NA	Record_2018-04-11_12-07-S02.csv	31.64809822	31.64	1.737438902	37.34	27.22	22500	32.80834107	32.92	1.586524067	40	27.66	34028	NA	NA	Natural grassland	Grassland
28	Plot5	Plot5_S03	S03	Grassland	2018_0411_115921_S03_G_CALIBRATED.JPG	0.627676582	0.634408602	0.097192954	1	-0.045454545	3400236	NA	NA	NA	NA	NA	NA	NA	Record_2018-04-11_12-07-S03.csv	31.158076	31.21	1.550029184	35.54	27.4	22500	31.6148163	31.66	1.802965238	38.58	27.17	50844	NA	NA	Natural grassland	Grassland
29	Plot5	Plot5_S04	S04	Grassland	2018_0411_115940_S04_G_CALIBRATED.JPG	0.588859216	0.595505618	0.109705052	1	-0.111111111	3495977	NA	NA	NA	NA	NA	NA	NA	Record_2018-04-11_12-08-S04.csv	36.069752	35.71	2.30361475	51.06	30.66	22500	35.92140195	35.59	2.709152402	51.06	29.01	36863	NA	NA	Natural grassland	Grassland
30	Plot5	Plot5_S05	S05	Grassland	2018_0411_115715_S05_G_CALIBRATED.JPG	0.666337206	0.6875	0.11092358	1	-0.142857143	3303663	NA	NA	NA	NA	NA	NA	NA	Record_2018-04-11_12-05-S05.csv	30.88994667	30.81	0.946131645	35.95	28.23	22500	30.81437096	30.81	1.090411332	35.95	27.82	33400	NA	NA	Natural grassland	Grassland
31	Plot8	Plot8_S01	S01	Grassland	2018_0411_142209_S01_G_CALIBRATED.JPG	0.446322863	0.428571429	0.279723224	1	-1	3034191	NA	NA	NA	NA	NA	NA	NA	NA	NA	NA	NA	NA	NA	NA	NA	NA	NA	NA	NA	NA	NA	NA	Natural grassland	Grassland
32	Plot8	Plot8_S02	S02	Grassland	2018_0411_142235_S02_G_CALIBRATED.JPG	0.51376022	0.5	0.320472428	1	-1	4140787	NA	NA	NA	NA	NA	NA	NA	NA	NA	NA	NA	NA	NA	NA	NA	NA	NA	NA	NA	NA	NA	NA	Natural grassland	Grassland
33	Plot8	Plot8_S03	S03	Grassland	2018_0411_142253_S03_G_CALIBRATED.JPG	0.485899182	0.5	0.276425121	1	-1	4335051	NA	NA	NA	NA	NA	NA	NA	NA	NA	NA	NA	NA	NA	NA	NA	NA	NA	NA	NA	NA	NA	NA	Natural grassland	Grassland
34	Plot8	Plot8_S04	S04	Grassland	2018_0411_142321_S04_G_CALIBRATED.JPG	0.480119488	0.5	0.254016717	1	-1	3728565	NA	NA	NA	NA	NA	NA	NA	NA	NA	NA	NA	NA	NA	NA	NA	NA	NA	NA	NA	NA	NA	NA	Natural grassland	Grassland
35	Plot8	Plot8_S05	S05	Grassland	2018_0411_142348_S05_G_CALIBRATED.JPG	0.480010096	0.5	0.222795904	1	-1	4014550	NA	NA	NA	NA	NA	NA	NA	NA	NA	NA	NA	NA	NA	NA	NA	NA	NA	NA	NA	NA	NA	NA	Natural grassland	Grassland
36	Plot10	Plot10_S01	S01	Edge	2018_0412_083139_S01_G_CALIBRATED.JPG	0.19876732	0	0.392123564	1	-1	4173035	2018_0412_083149_S01_S_CALIBRATED.JPG	0.300208396	0.333333333	0.409934723	1	-1	8278452	Record_2018-04-12_08-45-S01.csv	21.34851689	21.33	0.194304247	22.05	20.74	22500	21.56483691	21.55	0.257673973	22.58	20.76	43290	IMG_8137_S01.JPG_thresh.jpg	96.3	Coastal lowland forest edge	Edge
37	Plot10	Plot10_S02	S02	Edge	2018_0412_083229_S02_G_CALIBRATED.JPG	0.121756981	0	0.28595628	1	-1	3637989	2018_0412_083238_S02_S_CALIBRATED.JPG	0.154460451	0.142857143	0.377036626	1	-1	8280413	Record_2018-04-12_08-45-S02.csv	23.37511289	23.37	0.269335557	24.27	22.33	22500	23.27329061	23.23	0.347634261	24.35	22.27	30429	IMG_8138_S02.JPG_thresh.jpg	94.3	Coastal lowland forest edge	Edge
38	Plot10	Plot10_S03	S03	Edge	2018_0412_083314_S03_G_CALIBRATED.JPG	0.00935879	0	0.176375691	1	-1	3104225	2018_0412_083341_S03_S_CALIBRATED.JPG	-0.184091605	-0.1	0.335416945	1	-1	8294400	Record_2018-04-12_08-46-S03.csv	24.35686756	24.38	0.228883417	25.05	22.96	22500	24.31510055	24.32	0.222128741	25.05	22.38	47736	IMG_8139_S03.JPG_thresh.jpg	2.9	Coastal lowland forest edge	Edge
39	Plot10	Plot10_S04	S04	Edge	2018_0412_083400_S04_G_CALIBRATED.JPG	0.067721162	0	0.25432055	1	-1	2854499	2018_0412_083408_S04_S_CALIBRATED.JPG	-0.372029142	-0.557377049	0.303254937	1	-0.868852459	8294400	Record_2018-04-12_08-46-S04.csv	22.95816356	22.96	0.144556888	23.56	22.24	22500	22.90424748	22.91	0.182802968	23.73	21.8	49062	IMG_8140_S04.JPG_thresh.jpg	6.9	Coastal lowland forest edge	Edge
40	Plot10	Plot10_S05	S05	Edge	2018_0412_083056_S05_G_CALIBRATED.JPG	0.135848659	0	0.284099979	1	-1	4094780	2018_0412_083115_S05_S_CALIBRATED.JPG	-0.150263471	0	0.377439766	1	-1	8294323	Record_2018-04-12_08-44-S05.csv	23.68078222	23.7	0.227851116	24.4	22.88	22500	23.75547648	23.75	0.226585776	24.65	22.52	53874	IMG_8136_S05.JPG_thresh.jpg	88.8	Coastal lowland forest edge	Edge
41	Plot10	Plot10_S06	S06	Edge	NA	NA	NA	NA	NA	NA	NA	NA	NA	NA	NA	NA	NA	NA	NA	NA	NA	NA	NA	NA	NA	NA	NA	NA	NA	NA	NA	IMG_8141.JPG_thresh.jpg	96.9	Coastal lowland forest edge	Edge
42	Plot10	Plot10_S07	S07	Edge	NA	NA	NA	NA	NA	NA	NA	NA	NA	NA	NA	NA	NA	NA	NA	NA	NA	NA	NA	NA	NA	NA	NA	NA	NA	NA	NA	IMG_8142.JPG_thresh.jpg	92.6	Coastal lowland forest edge	Edge
43	Plot10	Plot10_S08	S08	Edge	NA	NA	NA	NA	NA	NA	NA	NA	NA	NA	NA	NA	NA	NA	NA	NA	NA	NA	NA	NA	NA	NA	NA	NA	NA	NA	NA	IMG_8143.JPG_thresh.jpg	93.4	Coastal lowland forest edge	Edge
44	Plot10	Plot10_S09	S09	Edge	NA	NA	NA	NA	NA	NA	NA	NA	NA	NA	NA	NA	NA	NA	NA	NA	NA	NA	NA	NA	NA	NA	NA	NA	NA	NA	NA	IMG_8144.JPG_thresh.jpg	3.1	Coastal lowland forest edge	Edge
45	Plot10	Plot10_S10	S10	Edge	NA	NA	NA	NA	NA	NA	NA	NA	NA	NA	NA	NA	NA	NA	NA	NA	NA	NA	NA	NA	NA	NA	NA	NA	NA	NA	NA	IMG_8145.JPG_thresh.jpg	0	Coastal lowland forest edge	Edge
46	Plot10	Plot10_S11	S11	Edge	NA	NA	NA	NA	NA	NA	NA	NA	NA	NA	NA	NA	NA	NA	NA	NA	NA	NA	NA	NA	NA	NA	NA	NA	NA	NA	NA	IMG_8146.JPG_thresh.jpg	92.5	Coastal lowland forest edge	Edge
47	Plot10	Plot10_S12	S12	Edge	NA	NA	NA	NA	NA	NA	NA	NA	NA	NA	NA	NA	NA	NA	NA	NA	NA	NA	NA	NA	NA	NA	NA	NA	NA	NA	NA	IMG_8147.JPG_thresh.jpg	77.2	Coastal lowland forest edge	Edge
48	Plot10	Plot10_S13	S13	Edge	NA	NA	NA	NA	NA	NA	NA	NA	NA	NA	NA	NA	NA	NA	NA	NA	NA	NA	NA	NA	NA	NA	NA	NA	NA	NA	NA	IMG_8148.JPG_thresh.jpg	9.5	Coastal lowland forest edge	Edge
49	Plot10	Plot10_S14	S14	Edge	NA	NA	NA	NA	NA	NA	NA	NA	NA	NA	NA	NA	NA	NA	NA	NA	NA	NA	NA	NA	NA	NA	NA	NA	NA	NA	NA	IMG_8149.JPG_thresh.jpg	99	Coastal lowland forest edge	Edge
50	Plot13	Plot13_S01	S01	Edge	2018_0412_100436_S01_G_CALIBRATED.JPG	0.03925008	0	0.195753261	1	-1	3518057	2018_0412_100443_S01_S_CALIBRATED.JPG	0.165874213	0.142857143	0.336964889	1	-1	8288062	Record_2018-04-12_10-20-S01.csv	22.69914933	22.71	0.272231358	23.45	21.88	22500	22.93336527	22.96	0.238264262	23.67	21.99	47800	IMG_8190_S01.JPG_thresh.jpg	94	Coastal lowland forest edge	Edge
51	Plot13	Plot13_S02	S02	Edge	2018_0412_100504_S02_G_CALIBRATED.JPG	0.289125576	0.333333333	0.466836213	1	-1	3480613	2018_0412_100510_S02_S_CALIBRATED.JPG	0.046033222	0.076923077	0.298167467	1	-1	8294248	Record_2018-04-12_10-21-S02.csv	22.64746711	22.6	0.263302705	23.59	21.94	22500	22.65647903	22.6	0.289431559	23.81	21.8	46010	IMG_8191_S02.JPG_thresh.jpg	73.3	Coastal lowland forest edge	Edge
52	Plot13	Plot13_S03	S03	Edge	2018_0412_100544_S03_G_CALIBRATED.JPG	0.164969377	0	0.432509522	1	-1	3298643	2018_0412_100551_S03_S_CALIBRATED.JPG	-0.147303751	-0.1	0.289991711	1	-1	8294392	Record_2018-04-12_10-21-S03.csv	23.09601244	23.1	0.198530093	23.75	22.35	22500	23.16048665	23.15	0.18024052	23.92	22.38	38940	IMG_8192_S03.JPG_thresh.jpg	92.9	Coastal lowland forest edge	Edge
53	Plot13	Plot13_S04	S04	Edge	2018_0412_100401_S04_G_CALIBRATED.JPG	0.056047149	0	0.239086997	1	-1	2765388	2018_0412_100408_S04_S_CALIBRATED.JPG	0.254492696	0.333333333	0.354398036	1	-1	8290197	Record_2018-04-12_10-19-S04.csv	23.15154711	23.18	0.226438308	23.86	22.33	22500	23.10598559	23.12	0.285244351	24.05	22.05	49980	IMG_8189_S04.JPG_thresh.jpg	87.7	Coastal lowland forest edge	Edge
54	Plot13	Plot13_S05	S05	Edge	2018_0412_100328_S05_G_CALIBRATED.JPG	0.305593299	0.142857143	0.516419672	1	-1	3076554	2018_0412_100350_S05_S_CALIBRATED.JPG	0.269456234	0.333333333	0.397062551	1	-1	8286422	Record_2018-04-12_10-19-S05.csv	24.07874489	24.08	0.2706377	25.1	23.07	22500	23.95795394	23.94	0.306235066	25.05	23.07	51543	IMG_8188_S05.JPG_thresh.jpg	94.7	Coastal lowland forest edge	Edge
55	Plot13	Plot13_S06	S06	Edge	NA	NA	NA	NA	NA	NA	NA	NA	NA	NA	NA	NA	NA	NA	NA	NA	NA	NA	NA	NA	NA	NA	NA	NA	NA	NA	NA	IMG_8193.JPG_thresh.jpg	99.2	Coastal lowland forest edge	Edge
56	Plot13	Plot13_S07	S07	Edge	NA	NA	NA	NA	NA	NA	NA	NA	NA	NA	NA	NA	NA	NA	NA	NA	NA	NA	NA	NA	NA	NA	NA	NA	NA	NA	NA	IMG_8194.JPG_thresh.jpg	97	Coastal lowland forest edge	Edge
57	Plot13	Plot13_S08	S08	Edge	NA	NA	NA	NA	NA	NA	NA	NA	NA	NA	NA	NA	NA	NA	NA	NA	NA	NA	NA	NA	NA	NA	NA	NA	NA	NA	NA	IMG_8195.JPG_thresh.jpg	98.1	Coastal lowland forest edge	Edge
58	Plot13	Plot13_S09	S09	Edge	NA	NA	NA	NA	NA	NA	NA	NA	NA	NA	NA	NA	NA	NA	NA	NA	NA	NA	NA	NA	NA	NA	NA	NA	NA	NA	NA	IMG_8196.JPG_thresh.jpg	95.9	Coastal lowland forest edge	Edge
59	Plot13	Plot13_S10	S10	Edge	NA	NA	NA	NA	NA	NA	NA	NA	NA	NA	NA	NA	NA	NA	NA	NA	NA	NA	NA	NA	NA	NA	NA	NA	NA	NA	NA	IMG_8197.JPG_thresh.jpg	44.3	Coastal lowland forest edge	Edge
60	Plot13	Plot13_S11	S11	Edge	NA	NA	NA	NA	NA	NA	NA	NA	NA	NA	NA	NA	NA	NA	NA	NA	NA	NA	NA	NA	NA	NA	NA	NA	NA	NA	NA	IMG_8198.JPG_thresh.jpg	27.6	Coastal lowland forest edge	Edge
61	Plot13	Plot13_S12	S12	Edge	NA	NA	NA	NA	NA	NA	NA	NA	NA	NA	NA	NA	NA	NA	NA	NA	NA	NA	NA	NA	NA	NA	NA	NA	NA	NA	NA	IMG_8199.JPG_thresh.jpg	4.9	Coastal lowland forest edge	Edge
62	Plot13	Plot13_S13	S13	Edge	NA	NA	NA	NA	NA	NA	NA	NA	NA	NA	NA	NA	NA	NA	NA	NA	NA	NA	NA	NA	NA	NA	NA	NA	NA	NA	NA	IMG_8200.JPG_thresh.jpg	94.7	Coastal lowland forest edge	Edge
63	Plot13	Plot13_S14	S14	Edge	NA	NA	NA	NA	NA	NA	NA	NA	NA	NA	NA	NA	NA	NA	NA	NA	NA	NA	NA	NA	NA	NA	NA	NA	NA	NA	NA	IMG_8201.JPG_thresh.jpg	86.3	Coastal lowland forest edge	Edge
64	Plot13	Plot13_S15	S15	Edge	NA	NA	NA	NA	NA	NA	NA	NA	NA	NA	NA	NA	NA	NA	NA	NA	NA	NA	NA	NA	NA	NA	NA	NA	NA	NA	NA	IMG_8202.JPG_thresh.jpg	90.8	Coastal lowland forest edge	Edge
65	Plot13	Plot13_S16	S16	Edge	NA	NA	NA	NA	NA	NA	NA	NA	NA	NA	NA	NA	NA	NA	NA	NA	NA	NA	NA	NA	NA	NA	NA	NA	NA	NA	NA	IMG_8203.JPG_thresh.jpg	77.2	Coastal lowland forest edge	Edge
66	Plot14	Plot14_S01	S01	Plantation	2018_0412_102747_S01_G_CALIBRATED.JPG	0.65204379	0.636363636	0.108027999	1	-1	3169197	2018_0412_102754_S01_S_CALIBRATED.JPG	0.599104702	0.70212766	0.245612918	1	-0.501597444	8294400	Record_2018-04-12_10-36-S01.csv	24.25462533	24.24	0.147638649	25.1	23.78	22500	24.24744081	24.24	0.180239892	25.13	23.64	74547	IMG_8206_S01.JPG_thresh.jpg	45.3	Eucalyptus plantation	Plantation
67	Plot14	Plot14_S02	S02	Plantation	2018_0412_102815_S02_G_CALIBRATED.JPG	0.622072998	0.611111111	0.106885866	1	-1	2737506	2018_0412_102822_S02_S_CALIBRATED.JPG	0.547605934	0.655172414	0.261924545	1	-1	8294400	Record_2018-04-12_10-36-S02.csv	23.88681867	23.89	0.14712787	24.4	23.37	22500	23.86461133	23.86	0.17388307	24.51	23.18	74536	IMG_8207_S02.JPG_thresh.jpg	54.3	Eucalyptus plantation	Plantation
68	Plot14	Plot14_S03	S03	Plantation	2018_0412_102847_S03_G_CALIBRATED.JPG	0.618488653	0.6	0.109078457	1	-1	3087863	2018_0412_102854_S03_S_CALIBRATED.JPG	0.591747882	0.68	0.24070577	1	-1	8294400	Record_2018-04-12_10-37-S03.csv	23.80339689	23.78	0.353408758	25.29	22.49	22500	23.76205746	23.73	0.39540889	25.48	22.19	58339	IMG_8208_S03.JPG_thresh.jpg	66.1	Eucalyptus plantation	Plantation
69	Plot14	Plot14_S04	S04	Plantation	2018_0412_102912_S04_G_CALIBRATED.JPG	0.626299245	0.6	0.163819484	1	-1	3003987	2018_0412_102919_S04_S_CALIBRATED.JPG	0.597757506	0.68627451	0.245318399	1	-1	8294400	Record_2018-04-12_10-37-S04.csv	23.79444978	23.75	0.319154323	25.02	22.44	22500	23.85645948	23.83	0.32507001	25.29	22.69	75746	IMG_8209_S04.JPG_thresh.jpg	82.8	Eucalyptus plantation	Plantation
70	Plot14	Plot14_S05	S05	Plantation	2018_0412_102713_S05_G_CALIBRATED.JPG	0.629695454	0.615384615	0.14761554	1	-1	3591261	2018_0412_102720_S05_S_CALIBRATED.JPG	0.588759345	0.684210526	0.247199371	1	-0.728813559	8294400	Record_2018-04-12_10-36-S05.csv	24.04748267	24.05	0.111858309	24.51	23.59	22500	24.06879699	24.05	0.150280887	24.65	23.1	65486	IMG_8205_S05.JPG_thresh.jpg	63.2	Eucalyptus plantation	Plantation
71	Plot14	Plot14_S06	S06	Plantation	NA	NA	NA	NA	NA	NA	NA	NA	NA	NA	NA	NA	NA	NA	NA	NA	NA	NA	NA	NA	NA	NA	NA	NA	NA	NA	NA	IMG_8210.JPG_thresh.jpg	84.5	Eucalyptus plantation	Plantation
72	Plot14	Plot14_S07	S07	Plantation	NA	NA	NA	NA	NA	NA	NA	NA	NA	NA	NA	NA	NA	NA	NA	NA	NA	NA	NA	NA	NA	NA	NA	NA	NA	NA	NA	IMG_8211.JPG_thresh.jpg	59.5	Eucalyptus plantation	Plantation
73	Plot14	Plot14_S08	S08	Plantation	NA	NA	NA	NA	NA	NA	NA	NA	NA	NA	NA	NA	NA	NA	NA	NA	NA	NA	NA	NA	NA	NA	NA	NA	NA	NA	NA	IMG_8212.JPG_thresh.jpg	43.9	Eucalyptus plantation	Plantation
74	Plot14	Plot14_S09	S09	Plantation	NA	NA	NA	NA	NA	NA	NA	NA	NA	NA	NA	NA	NA	NA	NA	NA	NA	NA	NA	NA	NA	NA	NA	NA	NA	NA	NA	IMG_8213.JPG_thresh.jpg	71.7	Eucalyptus plantation	Plantation
75	Plot14	Plot14_S10	S10	Plantation	NA	NA	NA	NA	NA	NA	NA	NA	NA	NA	NA	NA	NA	NA	NA	NA	NA	NA	NA	NA	NA	NA	NA	NA	NA	NA	NA	IMG_8214.JPG_thresh.jpg	55.5	Eucalyptus plantation	Plantation
76	Plot14	Plot14_S11	S11	Plantation	NA	NA	NA	NA	NA	NA	NA	NA	NA	NA	NA	NA	NA	NA	NA	NA	NA	NA	NA	NA	NA	NA	NA	NA	NA	NA	NA	IMG_8215.JPG_thresh.jpg	58.5	Eucalyptus plantation	Plantation
77	Plot14	Plot14_S12	S12	Plantation	NA	NA	NA	NA	NA	NA	NA	NA	NA	NA	NA	NA	NA	NA	NA	NA	NA	NA	NA	NA	NA	NA	NA	NA	NA	NA	NA	IMG_8216.JPG_thresh.jpg	78.1	Eucalyptus plantation	Plantation
78	Plot14	Plot14_S13	S13	Plantation	NA	NA	NA	NA	NA	NA	NA	NA	NA	NA	NA	NA	NA	NA	NA	NA	NA	NA	NA	NA	NA	NA	NA	NA	NA	NA	NA	IMG_8217.JPG_thresh.jpg	60.3	Eucalyptus plantation	Plantation
79	Plot14	Plot14_S14	S14	Plantation	NA	NA	NA	NA	NA	NA	NA	NA	NA	NA	NA	NA	NA	NA	NA	NA	NA	NA	NA	NA	NA	NA	NA	NA	NA	NA	NA	IMG_8218.JPG_thresh.jpg	65	Eucalyptus plantation	Plantation
80	Plot14	Plot14_S15	S15	Plantation	NA	NA	NA	NA	NA	NA	NA	NA	NA	NA	NA	NA	NA	NA	NA	NA	NA	NA	NA	NA	NA	NA	NA	NA	NA	NA	NA	IMG_8219.JPG_thresh.jpg	88.8	Eucalyptus plantation	Plantation
81	Plot14	Plot14_S16	S16	Plantation	NA	NA	NA	NA	NA	NA	NA	NA	NA	NA	NA	NA	NA	NA	NA	NA	NA	NA	NA	NA	NA	NA	NA	NA	NA	NA	NA	IMG_8220.JPG_thresh.jpg	73.6	Eucalyptus plantation	Plantation
82	Plot16	Plot16_S01	S01	Edge	2018_0412_120247_S01_G_CALIBRATED.JPG	0.069966115	0	0.254004149	1	-1	3118800	2018_0412_120253_S01_S_CALIBRATED.JPG	0.182289496	0	0.425875684	1	-1	8271221	Record_2018-04-12_12-10-S01.csv	22.55479067	22.55	0.163541698	23.15	21.83	22500	22.54740616	22.58	0.234350895	23.29	21.66	54718	IMG_8237_S01.JPG_thresh.jpg	98	Coastal lowland forest swamp forest mix edge	Edge
83	Plot16	Plot16_S02	S02	Edge	2018_0412_120338_S02_G_CALIBRATED.JPG	0.074869922	0	0.263704277	1	-0.333333333	2968277	2018_0412_120347_S02_S_CALIBRATED.JPG	0.100903737	0	0.303646807	1	-1	8260102	Record_2018-04-12_12-11-S02.csv	23.09694711	23.12	0.277416507	23.92	22.22	22500	23.03846644	23.07	0.302912356	24.08	22.02	48697	IMG_8238_S02.JPG_thresh.jpg	94.6	Coastal lowland forest swamp forest mix edge	Edge
84	Plot16	Plot16_S03	S03	Edge	2018_0412_120422_S03_G_CALIBRATED.JPG	0.060809599	0	0.191431187	1	-1	3265055	2018_0412_120429_S03_S_CALIBRATED.JPG	0.237811678	0.142857143	0.345379243	1	-1	8254057	Record_2018-04-12_12-11-S03.csv	24.12626533	24.08	0.447417134	25.98	22.96	22500	23.79023334	23.75	0.466711642	26.17	22.16	55328	IMG_8239_S03.JPG_thresh.jpg	87.1	Coastal lowland forest swamp forest mix edge	Edge
85	Plot16	Plot16_S04	S04	Edge	2018_0412_120454_S04_G_CALIBRATED.JPG	0.161651428	0.142857143	0.276203108	1	-1	3912290	2018_0412_120501_S04_S_CALIBRATED.JPG	-0.116410981	-0.047619048	0.326656868	1	-1	8294400	Record_2018-04-12_12-11-S04.csv	22.48802844	22.49	0.231232525	23.21	21.69	22500	22.57785952	22.6	0.253384234	23.29	21.74	33969	IMG_8240_S04.JPG_thresh.jpg	62.5	Coastal lowland forest swamp forest mix edge	Edge
86	Plot16	Plot16_S05	S05	Edge	2018_0412_120218_S05_G_CALIBRATED.JPG	0.053422412	0	0.220265576	1	-1	2939236	2018_0412_120224_S05_S_CALIBRATED.JPG	0.303730719	0.272727273	0.43014873	1	-1	8278749	Record_2018-04-12_12-09-S05.csv	22.67199511	22.66	0.254566642	23.51	21.97	22500	22.77236624	22.77	0.298108175	23.7	21.66	56034	IMG_8236_S05.JPG_thresh.jpg	90.6	Coastal lowland forest swamp forest mix edge	Edge
87	Plot16	Plot16_S06	S06	Edge	NA	NA	NA	NA	NA	NA	NA	NA	NA	NA	NA	NA	NA	NA	NA	NA	NA	NA	NA	NA	NA	NA	NA	NA	NA	NA	NA	IMG_8241.JPG_thresh.jpg	0	Coastal lowland forest swamp forest mix edge	Edge
88	Plot16	Plot16_S07	S07	Edge	NA	NA	NA	NA	NA	NA	NA	NA	NA	NA	NA	NA	NA	NA	NA	NA	NA	NA	NA	NA	NA	NA	NA	NA	NA	NA	NA	IMG_8242.JPG_thresh.jpg	99.5	Coastal lowland forest swamp forest mix edge	Edge
89	Plot16	Plot16_S08	S08	Edge	NA	NA	NA	NA	NA	NA	NA	NA	NA	NA	NA	NA	NA	NA	NA	NA	NA	NA	NA	NA	NA	NA	NA	NA	NA	NA	NA	IMG_8243.JPG_thresh.jpg	91.1	Coastal lowland forest swamp forest mix edge	Edge
90	Plot16	Plot16_S09	S09	Edge	NA	NA	NA	NA	NA	NA	NA	NA	NA	NA	NA	NA	NA	NA	NA	NA	NA	NA	NA	NA	NA	NA	NA	NA	NA	NA	NA	IMG_8244.JPG_thresh.jpg	96.2	Coastal lowland forest swamp forest mix edge	Edge
91	Plot16	Plot16_S10	S10	Edge	NA	NA	NA	NA	NA	NA	NA	NA	NA	NA	NA	NA	NA	NA	NA	NA	NA	NA	NA	NA	NA	NA	NA	NA	NA	NA	NA	IMG_8245.JPG_thresh.jpg	95.9	Coastal lowland forest swamp forest mix edge	Edge
92	Plot16	Plot16_S11	S11	Edge	NA	NA	NA	NA	NA	NA	NA	NA	NA	NA	NA	NA	NA	NA	NA	NA	NA	NA	NA	NA	NA	NA	NA	NA	NA	NA	NA	IMG_8246.JPG_thresh.jpg	96.2	Coastal lowland forest swamp forest mix edge	Edge
93	Plot16	Plot16_S12	S12	Edge	NA	NA	NA	NA	NA	NA	NA	NA	NA	NA	NA	NA	NA	NA	NA	NA	NA	NA	NA	NA	NA	NA	NA	NA	NA	NA	NA	IMG_8247.JPG_thresh.jpg	91	Coastal lowland forest swamp forest mix edge	Edge
94	Plot16	Plot16_S13	S13	Edge	NA	NA	NA	NA	NA	NA	NA	NA	NA	NA	NA	NA	NA	NA	NA	NA	NA	NA	NA	NA	NA	NA	NA	NA	NA	NA	NA	IMG_8248.JPG_thresh.jpg	90.8	Coastal lowland forest swamp forest mix edge	Edge
95	Plot16	Plot16_S14	S14	Edge	NA	NA	NA	NA	NA	NA	NA	NA	NA	NA	NA	NA	NA	NA	NA	NA	NA	NA	NA	NA	NA	NA	NA	NA	NA	NA	NA	IMG_8249.JPG_thresh.jpg	93.2	Coastal lowland forest swamp forest mix edge	Edge
96	Plot17	Plot17_S01	S01	Plantation	2018_0412_121758_S01_G_CALIBRATED.JPG	0.337568247	0.333333333	0.368435835	1	-1	2605706	2018_0412_121805_S01_S_CALIBRATED.JPG	-0.337343712	-0.333333333	0.229384986	1	-0.97260274	8294400	Record_2018-04-12_12-25-S01.csv	24.34256844	24.35	0.493087326	26.09	22.82	22500	25.32315407	25.16	0.990680195	28.67	22.93	56026	IMG_8252_S01.JPG_thresh.jpg	51.4	Eucalyptus plantation	Plantation
97	Plot17	Plot17_S02	S02	Plantation	2018_0412_121828_S02_G_CALIBRATED.JPG	0.215171658	0.142857143	0.290082393	1	-1	3762530	2018_0412_121842_S02_S_CALIBRATED.JPG	-0.315467926	-0.294117647	0.231208477	1	-0.882352941	8294400	Record_2018-04-12_12-26-S02.csv	26.22878133	26.19	0.670849108	28.62	23.48	22500	25.8453963	25.9	0.78023958	28.62	23.23	50568	IMG_8253_S02.JPG_thresh.jpg	43.4	Eucalyptus plantation	Plantation
98	Plot17	Plot17_S03	S03	Plantation	2018_0412_121913_S03_G_CALIBRATED.JPG	0.333456219	0.333333333	0.250751959	1	-1	4034176	2018_0412_121920_S03_S_CALIBRATED.JPG	-0.29119252	-0.272727273	0.236378718	0.857142857	-0.884057971	8294400	Record_2018-04-12_12-26-S03.csv	24.74185689	24.75	0.365477672	25.93	23.48	22500	24.55790189	24.54	0.384847014	25.93	23.34	40546	IMG_8254_S03.JPG_thresh.jpg	45	Eucalyptus plantation	Plantation
99	Plot17	Plot17_S04	S04	Plantation	2018_0412_121940_S04_G_CALIBRATED.JPG	0.298243764	0.333333333	0.224370815	1	-1	3835476	2018_0412_121949_S04_S_CALIBRATED.JPG	-0.241491454	-0.214285714	0.256938554	1	-0.825	8294400	Record_2018-04-12_12-27-S04.csv	24.33816311	24.35	0.316189659	25.45	23.48	22500	24.62801642	24.65	0.395141812	25.98	23.51	44823	IMG_8255_S04.JPG_thresh.jpg	50.6	Eucalyptus plantation	Plantation
100	Plot17	Plot17_S05	S05	Plantation	2018_0412_121718_S05_G_CALIBRATED.JPG	0.354564754	0.333333333	0.322592548	1	-1	3204604	2018_0412_121723_S05_S_CALIBRATED.JPG	-0.306655895	-0.277777778	0.261541908	1	-1	8294400	Record_2018-04-12_12-25-S05.csv	25.57890933	25.56	0.632473158	27.9	23.94	22500	25.95159936	25.88	0.528796815	28.62	24.43	30456	IMG_8251_S05.JPG_thresh.jpg	53.8	Eucalyptus plantation	Plantation
101	Plot17	Plot17_S06	S06	Plantation	NA	NA	NA	NA	NA	NA	NA	NA	NA	NA	NA	NA	NA	NA	NA	NA	NA	NA	NA	NA	NA	NA	NA	NA	NA	NA	NA	IMG_8256.JPG_thresh.jpg	46.3	Eucalyptus plantation	Plantation
102	Plot17	Plot17_S07	S07	Plantation	NA	NA	NA	NA	NA	NA	NA	NA	NA	NA	NA	NA	NA	NA	NA	NA	NA	NA	NA	NA	NA	NA	NA	NA	NA	NA	NA	IMG_8257.JPG_thresh.jpg	53.7	Eucalyptus plantation	Plantation
103	Plot17	Plot17_S08	S08	Plantation	NA	NA	NA	NA	NA	NA	NA	NA	NA	NA	NA	NA	NA	NA	NA	NA	NA	NA	NA	NA	NA	NA	NA	NA	NA	NA	NA	IMG_8258.JPG_thresh.jpg	40.3	Eucalyptus plantation	Plantation
104	Plot17	Plot17_S09	S09	Plantation	NA	NA	NA	NA	NA	NA	NA	NA	NA	NA	NA	NA	NA	NA	NA	NA	NA	NA	NA	NA	NA	NA	NA	NA	NA	NA	NA	IMG_8259.JPG_thresh.jpg	57	Eucalyptus plantation	Plantation
105	Plot17	Plot17_S10	S10	Plantation	NA	NA	NA	NA	NA	NA	NA	NA	NA	NA	NA	NA	NA	NA	NA	NA	NA	NA	NA	NA	NA	NA	NA	NA	NA	NA	NA	IMG_8260.JPG_thresh.jpg	52.7	Eucalyptus plantation	Plantation
106	Plot17	Plot17_S11	S11	Plantation	NA	NA	NA	NA	NA	NA	NA	NA	NA	NA	NA	NA	NA	NA	NA	NA	NA	NA	NA	NA	NA	NA	NA	NA	NA	NA	NA	IMG_8261.JPG_thresh.jpg	55.7	Eucalyptus plantation	Plantation
107	Plot17	Plot17_S12	S12	Plantation	NA	NA	NA	NA	NA	NA	NA	NA	NA	NA	NA	NA	NA	NA	NA	NA	NA	NA	NA	NA	NA	NA	NA	NA	NA	NA	NA	IMG_8262.JPG_thresh.jpg	43.6	Eucalyptus plantation	Plantation
108	Plot17	Plot17_S13	S13	Plantation	NA	NA	NA	NA	NA	NA	NA	NA	NA	NA	NA	NA	NA	NA	NA	NA	NA	NA	NA	NA	NA	NA	NA	NA	NA	NA	NA	IMG_8263.JPG_thresh.jpg	41.1	Eucalyptus plantation	Plantation
109	Plot17	Plot17_S14	S14	Plantation	NA	NA	NA	NA	NA	NA	NA	NA	NA	NA	NA	NA	NA	NA	NA	NA	NA	NA	NA	NA	NA	NA	NA	NA	NA	NA	NA	IMG_8264.JPG_thresh.jpg	39.9	Eucalyptus plantation	Plantation
110	Plot17	Plot17_S15	S15	Plantation	NA	NA	NA	NA	NA	NA	NA	NA	NA	NA	NA	NA	NA	NA	NA	NA	NA	NA	NA	NA	NA	NA	NA	NA	NA	NA	NA	IMG_8265.JPG_thresh.jpg	51.8	Eucalyptus plantation	Plantation
111	Plot17	Plot17_S16	S16	Plantation	NA	NA	NA	NA	NA	NA	NA	NA	NA	NA	NA	NA	NA	NA	NA	NA	NA	NA	NA	NA	NA	NA	NA	NA	NA	NA	NA	IMG_8266.JPG_thresh.jpg	55.5	Eucalyptus plantation	Plantation
112	Plot18	Plot18_S01	S01	Forest	2018_0412_124017_S01_G_CALIBRATED.JPG	0.061679966	0	0.240325769	1	-1	3053453	2018_0412_124023_S01_S_CALIBRATED.JPG	0.241669901	0.142857143	0.356699797	1	-1	8233904	Record_2018-04-12_12-48-S01.csv	21.67905689	21.69	0.151259639	22.24	21.05	22500	21.72209933	21.72	0.158373059	22.44	21.05	46010	IMG_8269_S01.JPG_thresh.jpg	97.2	Coastal lowland forest swamp forest mix	Forest
113	Plot18	Plot18_S02	S02	Forest	2018_0412_124057_S02_G_CALIBRATED.JPG	0.074794449	0	0.263565789	1	-0.333333333	2713401	2018_0412_124102_S02_S_CALIBRATED.JPG	0.275414498	0	0.499508985	1	-1	8262812	Record_2018-04-12_12-49-S02.csv	21.53562622	21.55	0.133154615	22.02	20.76	22500	21.48766717	21.49	0.155990327	22.11	20.71	51294	IMG_8270_S02.JPG_thresh.jpg	99.4	Coastal lowland forest swamp forest mix	Forest
114	Plot18	Plot18_S03	S03	Forest	2018_0412_124127_S03_G_CALIBRATED.JPG	0.069956358	0	0.255502826	1	-0.333333333	2501998	2018_0412_124135_S03_S_CALIBRATED.JPG	0.305899916	0.142857143	0.481731583	1	-1	8269273	Record_2018-04-12_12-49-S03.csv	21.41756222	21.44	0.214895651	22.16	20.51	22500	21.27974687	21.33	0.268226157	22.02	20.31	56019	IMG_8271_S03.JPG_thresh.jpg	90.2	Coastal lowland forest swamp forest mix	Forest
115	Plot18	Plot18_S04	S04	Forest	2018_0412_124204_S04_G_CALIBRATED.JPG	0.139883623	0	0.347712902	1	-0.333333333	3628664	2018_0412_124210_S04_S_CALIBRATED.JPG	0.096048369	0	0.305619539	1	-1	8253421	Record_2018-04-12_12-50-S04.csv	21.58095067	21.6	0.178374186	22.19	20.93	22500	21.59242531	21.58	0.1700729	22.27	20.65	42510	IMG_8272_S04.JPG_thresh.jpg	88.4	Coastal lowland forest swamp forest mix	Forest
116	Plot18	Plot18_S05	S05	Forest	2018_0412_123924_S05_G_CALIBRATED.JPG	0.053360257	0	0.226200323	1	-1	2720617	2018_0412_123930_S05_S_CALIBRATED.JPG	0.272731571	0	0.471616738	1	-1	8263543	Record_2018-04-12_12-47-S05.csv	22.48199867	22.49	0.173935221	23.12	21.49	22500	22.48161584	22.49	0.194639947	23.21	21.44	47808	IMG_8268_S05.JPG_thresh.jpg	92.6	Coastal lowland forest swamp forest mix	Forest
117	Plot18	Plot18_S06	S06	Forest	NA	NA	NA	NA	NA	NA	NA	NA	NA	NA	NA	NA	NA	NA	NA	NA	NA	NA	NA	NA	NA	NA	NA	NA	NA	NA	NA	IMG_8273.JPG_thresh.jpg	88.8	Coastal lowland forest swamp forest mix	Forest
118	Plot18	Plot18_S07	S07	Forest	NA	NA	NA	NA	NA	NA	NA	NA	NA	NA	NA	NA	NA	NA	NA	NA	NA	NA	NA	NA	NA	NA	NA	NA	NA	NA	NA	IMG_8274.JPG_thresh.jpg	94.5	Coastal lowland forest swamp forest mix	Forest
119	Plot18	Plot18_S08	S08	Forest	NA	NA	NA	NA	NA	NA	NA	NA	NA	NA	NA	NA	NA	NA	NA	NA	NA	NA	NA	NA	NA	NA	NA	NA	NA	NA	NA	IMG_8275.JPG_thresh.jpg	98.2	Coastal lowland forest swamp forest mix	Forest
120	Plot18	Plot18_S09	S09	Forest	NA	NA	NA	NA	NA	NA	NA	NA	NA	NA	NA	NA	NA	NA	NA	NA	NA	NA	NA	NA	NA	NA	NA	NA	NA	NA	NA	IMG_8276.JPG_thresh.jpg	86.4	Coastal lowland forest swamp forest mix	Forest
121	Plot18	Plot18_S10	S10	Forest	NA	NA	NA	NA	NA	NA	NA	NA	NA	NA	NA	NA	NA	NA	NA	NA	NA	NA	NA	NA	NA	NA	NA	NA	NA	NA	NA	IMG_8277.JPG_thresh.jpg	98.5	Coastal lowland forest swamp forest mix	Forest
122	Plot18	Plot18_S11	S11	Forest	NA	NA	NA	NA	NA	NA	NA	NA	NA	NA	NA	NA	NA	NA	NA	NA	NA	NA	NA	NA	NA	NA	NA	NA	NA	NA	NA	IMG_8278.JPG_thresh.jpg	95.9	Coastal lowland forest swamp forest mix	Forest
123	Plot18	Plot18_S12	S12	Forest	NA	NA	NA	NA	NA	NA	NA	NA	NA	NA	NA	NA	NA	NA	NA	NA	NA	NA	NA	NA	NA	NA	NA	NA	NA	NA	NA	IMG_8279.JPG_thresh.jpg	98.1	Coastal lowland forest swamp forest mix	Forest
124	Plot18	Plot18_S13	S13	Forest	NA	NA	NA	NA	NA	NA	NA	NA	NA	NA	NA	NA	NA	NA	NA	NA	NA	NA	NA	NA	NA	NA	NA	NA	NA	NA	NA	IMG_8280.JPG_thresh.jpg	99.1	Coastal lowland forest swamp forest mix	Forest
125	Plot18	Plot18_S14	S14	Forest	NA	NA	NA	NA	NA	NA	NA	NA	NA	NA	NA	NA	NA	NA	NA	NA	NA	NA	NA	NA	NA	NA	NA	NA	NA	NA	NA	IMG_8281.JPG_thresh.jpg	89.1	Coastal lowland forest swamp forest mix	Forest
126	Plot19	Plot19_S01	S01	Edge	2018_0412_125637_S01_G_CALIBRATED.JPG	0.340178583	0.333333333	0.446159093	1	-1	3110346	2018_0412_125642_S01_S_CALIBRATED.JPG	0.28380042	0.333333333	0.324410007	1	-1	8289949	Record_2018-04-12_13-04-S01.csv	24.014592	24	0.259641939	25	22.88	22500	24.0300482	24	0.233056091	24.75	23.34	19296	IMG_8284_S01.JPG_thresh.jpg	93.3	Coastal lowland forest swamp forest mix edge	Edge
127	Plot19	Plot19_S02	S02	Edge	2018_0412_125709_S02_G_CALIBRATED.JPG	0.375496211	0.333333333	0.341638233	1	-1	3899474	2018_0412_125716_S02_S_CALIBRATED.JPG	-0.160143755	-0.12	0.343776379	1	-1	8294400	Record_2018-04-12_13-05-S02.csv	24.29801422	24.29	0.251031427	25.45	23.48	22500	24.30625177	24.29	0.315313291	28.13	23.21	40950	IMG_8285_S02.JPG_thresh.jpg	63	Coastal lowland forest swamp forest mix edge	Edge
128	Plot19	Plot19_S03	S03	Edge	2018_0412_125751_S03_G_CALIBRATED.JPG	0.375942672	0.333333333	0.403343312	1	-1	3400806	2018_0412_125844_S03_S_CALIBRATED.JPG	-0.019678258	0.058823529	0.324293375	1	-1	8294374	Record_2018-04-12_13-05-S03.csv	23.75750533	23.81	0.293141938	24.67	21.88	22500	23.48941404	23.51	0.367114549	24.65	21.88	37818	IMG_8286_S03.JPG_thresh.jpg	78.8	Coastal lowland forest swamp forest mix edge	Edge
129	Plot19	Plot19_S04	S04	Edge	2018_0412_125815_S04_G_CALIBRATED.JPG	0.17344738	0	0.315964311	1	-1	3249066	2018_0412_125821_S04_S_CALIBRATED.JPG	0.249824681	0.076923077	0.424981908	1	-1	8269062	Record_2018-04-12_13-06-S04.csv	23.12101822	23.12	0.206279435	24.54	22.19	22500	23.13587472	23.12	0.22664761	24.54	22.05	25654	IMG_8287_S04.JPG_thresh.jpg	95.4	Coastal lowland forest swamp forest mix edge	Edge
130	Plot19	Plot19_S05	S05	Edge	2018_0412_125605_S05_G_CALIBRATED.JPG	0.240479977	0	0.415867529	1	-1	3160158	2018_0412_125611_S05_S_CALIBRATED.JPG	0.139958512	0.142857143	0.32584487	1	-1	8294025	Record_2018-04-12_13-04-S05.csv	24.66077244	24.65	0.513679591	26.06	23.15	22500	24.83063752	24.89	0.500498683	26.4	22.88	45630	IMG_8283_S05.JPG_thresh.jpg	70	Coastal lowland forest swamp forest mix edge	Edge
131	Plot19	Plot19_S06	S06	Edge	NA	NA	NA	NA	NA	NA	NA	NA	NA	NA	NA	NA	NA	NA	NA	NA	NA	NA	NA	NA	NA	NA	NA	NA	NA	NA	NA	IMG_8288.JPG_thresh.jpg	89.9	Coastal lowland forest swamp forest mix edge	Edge
132	Plot19	Plot19_S07	S07	Edge	NA	NA	NA	NA	NA	NA	NA	NA	NA	NA	NA	NA	NA	NA	NA	NA	NA	NA	NA	NA	NA	NA	NA	NA	NA	NA	NA	IMG_8289.JPG_thresh.jpg	96.9	Coastal lowland forest swamp forest mix edge	Edge
133	Plot19	Plot19_S08	S08	Edge	NA	NA	NA	NA	NA	NA	NA	NA	NA	NA	NA	NA	NA	NA	NA	NA	NA	NA	NA	NA	NA	NA	NA	NA	NA	NA	NA	IMG_8290.JPG_thresh.jpg	90	Coastal lowland forest swamp forest mix edge	Edge
134	Plot19	Plot19_S09	S09	Edge	NA	NA	NA	NA	NA	NA	NA	NA	NA	NA	NA	NA	NA	NA	NA	NA	NA	NA	NA	NA	NA	NA	NA	NA	NA	NA	NA	IMG_8291.JPG_thresh.jpg	93.2	Coastal lowland forest swamp forest mix edge	Edge
135	Plot19	Plot19_S10	S10	Edge	NA	NA	NA	NA	NA	NA	NA	NA	NA	NA	NA	NA	NA	NA	NA	NA	NA	NA	NA	NA	NA	NA	NA	NA	NA	NA	NA	IMG_8292.JPG_thresh.jpg	91.2	Coastal lowland forest swamp forest mix edge	Edge
136	Plot19	Plot19_S11	S11	Edge	NA	NA	NA	NA	NA	NA	NA	NA	NA	NA	NA	NA	NA	NA	NA	NA	NA	NA	NA	NA	NA	NA	NA	NA	NA	NA	NA	IMG_8293.JPG_thresh.jpg	80.5	Coastal lowland forest swamp forest mix edge	Edge
137	Plot19	Plot19_S12	S12	Edge	NA	NA	NA	NA	NA	NA	NA	NA	NA	NA	NA	NA	NA	NA	NA	NA	NA	NA	NA	NA	NA	NA	NA	NA	NA	NA	NA	IMG_8294.JPG_thresh.jpg	0	Coastal lowland forest swamp forest mix edge	Edge
138	Plot19	Plot19_S13	S13	Edge	NA	NA	NA	NA	NA	NA	NA	NA	NA	NA	NA	NA	NA	NA	NA	NA	NA	NA	NA	NA	NA	NA	NA	NA	NA	NA	NA	IMG_8295.JPG_thresh.jpg	0	Coastal lowland forest swamp forest mix edge	Edge
139	Plot19	Plot19_S14	S14	Edge	NA	NA	NA	NA	NA	NA	NA	NA	NA	NA	NA	NA	NA	NA	NA	NA	NA	NA	NA	NA	NA	NA	NA	NA	NA	NA	NA	IMG_8296.JPG_thresh.jpg	0	Coastal lowland forest swamp forest mix edge	Edge
140	Plot19	Plot19_S15	S15	Edge	NA	NA	NA	NA	NA	NA	NA	NA	NA	NA	NA	NA	NA	NA	NA	NA	NA	NA	NA	NA	NA	NA	NA	NA	NA	NA	NA	IMG_8297.JPG_thresh.jpg	60.3	Coastal lowland forest swamp forest mix edge	Edge
141	Plot19	Plot19_S16	S16	Edge	NA	NA	NA	NA	NA	NA	NA	NA	NA	NA	NA	NA	NA	NA	NA	NA	NA	NA	NA	NA	NA	NA	NA	NA	NA	NA	NA	IMG_8298.JPG_thresh.jpg	64.9	Coastal lowland forest swamp forest mix edge	Edge
142	Plot20	Plot20_S01	S01	Plantation	2018_0412_131232_S01_G_CALIBRATED.JPG	0.3693631	0.333333333	0.409270398	1	-1	2940850	2018_0412_131237_S01_S_CALIBRATED.JPG	-0.198894246	-0.142857143	0.320246563	1	-1	8294399	Record_2018-04-12_13-18-S01.csv	23.02598711	23.02	0.237534353	23.89	22.05	22500	23.00223254	23.02	0.270709684	23.97	21.91	50176	IMG_8303_S01.JPG_thresh.jpg	82.2	Eucalyptus plantation	Plantation
143	Plot20	Plot20_S02	S02	Plantation	2018_0412_131039_S02_G_CALIBRATED.JPG	0.323399382	0.333333333	0.39750102	1	-1	2884948	2018_0412_131043_S02_S_CALIBRATED.JPG	-0.221607356	-0.166666667	0.29234444	1	-1	8294400	Record_2018-04-12_13-16-S02.csv	23.61426	23.53	0.44992351	25.26	22.33	22500	23.51518465	23.45	0.602095726	25.85	21.86	42946	IMG_8300_S02.JPG_thresh.jpg	52.1	Eucalyptus plantation	Plantation
144	Plot20	Plot20_S03	S03	Plantation	2018_0412_131130_S03_G_CALIBRATED.JPG	0.333434653	0.333333333	0.304245142	1	-1	2669329	2018_0412_131135_S03_S_CALIBRATED.JPG	-0.230487498	-0.172413793	0.287701056	1	-1	8294400	Record_2018-04-12_13-17-S03.csv	23.52456311	23.53	0.299793431	24.67	22.27	22500	23.31926883	23.29	0.380384533	24.91	22.08	37980	IMG_8301_S03.JPG_thresh.jpg	56.7	Eucalyptus plantation	Plantation
145	Plot20	Plot20_S04	S04	Plantation	2018_0412_131159_S04_G_CALIBRATED.JPG	0.250393279	0.333333333	0.288797635	1	-1	3137867	2018_0412_131204_S04_S_CALIBRATED.JPG	-0.206612702	-0.142857143	0.314630809	1	-1	8294399	Record_2018-04-12_13-17-S04.csv	23.44144978	23.48	0.371169424	25.1	22.08	22500	23.66726997	23.67	0.427499036	25.88	21.77	34278	IMG_8302_S04.JPG_thresh.jpg	61.1	Eucalyptus plantation	Plantation
146	Plot20	Plot20_S05	S05	Plantation	2018_0412_131015_S05_G_CALIBRATED.JPG	0.370747482	0.333333333	0.301087373	1	-1	2870247	2018_0412_131021_S05_S_CALIBRATED.JPG	-0.231999159	-0.214285714	0.289616783	1	-1	8294400	Record_2018-04-12_13-16-S05.csv	24.214016	24.21	0.388475506	25.66	22.93	22500	24.16882576	24.19	0.387713247	25.48	22.91	30275	IMG_8299_S05.JPG_thresh.jpg	42.2	Eucalyptus plantation	Plantation
147	Plot20	Plot20_S06	S06	Plantation	NA	NA	NA	NA	NA	NA	NA	NA	NA	NA	NA	NA	NA	NA	NA	NA	NA	NA	NA	NA	NA	NA	NA	NA	NA	NA	NA	IMG_8304.JPG_thresh.jpg	61.2	Eucalyptus plantation	Plantation
148	Plot20	Plot20_S07	S07	Plantation	NA	NA	NA	NA	NA	NA	NA	NA	NA	NA	NA	NA	NA	NA	NA	NA	NA	NA	NA	NA	NA	NA	NA	NA	NA	NA	NA	IMG_8305.JPG_thresh.jpg	58.8	Eucalyptus plantation	Plantation
149	Plot20	Plot20_S08	S08	Plantation	NA	NA	NA	NA	NA	NA	NA	NA	NA	NA	NA	NA	NA	NA	NA	NA	NA	NA	NA	NA	NA	NA	NA	NA	NA	NA	NA	IMG_8306.JPG_thresh.jpg	50.4	Eucalyptus plantation	Plantation
150	Plot20	Plot20_S09	S09	Plantation	NA	NA	NA	NA	NA	NA	NA	NA	NA	NA	NA	NA	NA	NA	NA	NA	NA	NA	NA	NA	NA	NA	NA	NA	NA	NA	NA	IMG_8307.JPG_thresh.jpg	63.6	Eucalyptus plantation	Plantation
151	Plot20	Plot20_S10	S10	Plantation	NA	NA	NA	NA	NA	NA	NA	NA	NA	NA	NA	NA	NA	NA	NA	NA	NA	NA	NA	NA	NA	NA	NA	NA	NA	NA	NA	IMG_8308.JPG_thresh.jpg	57.2	Eucalyptus plantation	Plantation
152	Plot20	Plot20_S11	S11	Plantation	NA	NA	NA	NA	NA	NA	NA	NA	NA	NA	NA	NA	NA	NA	NA	NA	NA	NA	NA	NA	NA	NA	NA	NA	NA	NA	NA	IMG_8309.JPG_thresh.jpg	53.5	Eucalyptus plantation	Plantation
153	Plot20	Plot20_S12	S12	Plantation	NA	NA	NA	NA	NA	NA	NA	NA	NA	NA	NA	NA	NA	NA	NA	NA	NA	NA	NA	NA	NA	NA	NA	NA	NA	NA	NA	IMG_8310.JPG_thresh.jpg	59.6	Eucalyptus plantation	Plantation
154	Plot20	Plot20_S13	S13	Plantation	NA	NA	NA	NA	NA	NA	NA	NA	NA	NA	NA	NA	NA	NA	NA	NA	NA	NA	NA	NA	NA	NA	NA	NA	NA	NA	NA	IMG_8311.JPG_thresh.jpg	55.1	Eucalyptus plantation	Plantation
155	Plot20	Plot20_S14	S14	Plantation	NA	NA	NA	NA	NA	NA	NA	NA	NA	NA	NA	NA	NA	NA	NA	NA	NA	NA	NA	NA	NA	NA	NA	NA	NA	NA	NA	IMG_8312.JPG_thresh.jpg	59.8	Eucalyptus plantation	Plantation
156	Plot22	Plot22_S01	S01	Edge	2018_0413_073042_S01_G_CALIBRATED.JPG	-0.251899882	0	0.437967323	1	-1	3247114	2018_0413_073049_S01_S_CALIBRATED.JPG	0.33130932	0	0.591909689	1	-1	8257829	Record_2018-04-13_07-43-S01.csv	19.73045111	19.72	0.2948174	20.71	18.86	22500	19.70290199	19.69	0.35763712	20.88	18.77	52116	IMG_8332_S01.JPG_thresh.jpg	92.9	Scarp forest edge	Edge
157	Plot22	Plot22_S02	S02	Edge	2018_0413_073111_S02_G_CALIBRATED.JPG	0.02580628	0	0.599556535	1	-1	3304802	2018_0413_073117_S02_S_CALIBRATED.JPG	0.043915993	0	0.499611565	1	-1	8253866	Record_2018-04-13_07-43-S02.csv	20.149416	20.28	0.47968461	21.63	18.48	22500	20.07700425	20.2	0.508933864	21.63	18.48	36465	IMG_8333_S02.JPG_thresh.jpg	97.9	Scarp forest edge	Edge
158	Plot22	Plot22_S03	S03	Edge	2018_0413_073155_S03_G_CALIBRATED.JPG	-0.08259815	-0.111111111	0.320389167	1	-1	3204109	2018_0413_073201_S03_S_CALIBRATED.JPG	-0.127901812	-0.090909091	0.259535447	1	-1	8294394	Record_2018-04-13_07-44-S03.csv	20.36606844	20.4	0.278821803	21.16	19.49	22500	20.35731386	20.37	0.27585956	21.3	19.49	36465	IMG_8334_S03.JPG_thresh.jpg	89	Scarp forest edge	Edge
159	Plot22	Plot22_S04	S04	Edge	2018_0413_073231_S04_G_CALIBRATED.JPG	0.009395898	0	0.340898804	1	-1	3029590	2018_0413_073237_S04_S_CALIBRATED.JPG	0.044936305	0.076923077	0.282348836	1	-1	8293077	Record_2018-04-13_07-46-S04.csv	22.01683022	21.83	0.947870596	25.72	20.11	22500	22.37870623	22.11	1.121932974	27.58	20.11	42411	IMG_8335_S04.JPG_thresh.jpg	92.3	Scarp forest edge	Edge
160	Plot22	Plot22_S05	S05	Edge	2018_0413_072948_S05_G_CALIBRATED.JPG	0.084110309	0	0.439448136	1	-1	1942232	2018_0413_072959_S05_S_CALIBRATED.JPG	-0.018856792	0	0.441026358	1	-1	8277670	Record_2018-04-13_07-42-S05.csv	21.56136444	21.6	0.506079538	22.8	19.83	22500	21.76568848	21.69	0.772793234	33.17	19.89	53872	IMG_8331_S05.JPG_thresh.jpg	66.3	Scarp forest edge	Edge
161	Plot22	Plot22_S06	S06	Edge	NA	NA	NA	NA	NA	NA	NA	NA	NA	NA	NA	NA	NA	NA	NA	NA	NA	NA	NA	NA	NA	NA	NA	NA	NA	NA	NA	IMG_8336.JPG_thresh.jpg	97.9	Scarp forest edge	Edge
162	Plot22	Plot22_S07	S07	Edge	NA	NA	NA	NA	NA	NA	NA	NA	NA	NA	NA	NA	NA	NA	NA	NA	NA	NA	NA	NA	NA	NA	NA	NA	NA	NA	NA	IMG_8337.JPG_thresh.jpg	97.3	Scarp forest edge	Edge
163	Plot22	Plot22_S08	S08	Edge	NA	NA	NA	NA	NA	NA	NA	NA	NA	NA	NA	NA	NA	NA	NA	NA	NA	NA	NA	NA	NA	NA	NA	NA	NA	NA	NA	IMG_8338.JPG_thresh.jpg	93.2	Scarp forest edge	Edge
164	Plot22	Plot22_S09	S09	Edge	NA	NA	NA	NA	NA	NA	NA	NA	NA	NA	NA	NA	NA	NA	NA	NA	NA	NA	NA	NA	NA	NA	NA	NA	NA	NA	NA	IMG_8339.JPG_thresh.jpg	84.9	Scarp forest edge	Edge
165	Plot22	Plot22_S10	S10	Edge	NA	NA	NA	NA	NA	NA	NA	NA	NA	NA	NA	NA	NA	NA	NA	NA	NA	NA	NA	NA	NA	NA	NA	NA	NA	NA	NA	IMG_8340.JPG_thresh.jpg	85.4	Scarp forest edge	Edge
166	Plot22	Plot22_S11	S11	Edge	NA	NA	NA	NA	NA	NA	NA	NA	NA	NA	NA	NA	NA	NA	NA	NA	NA	NA	NA	NA	NA	NA	NA	NA	NA	NA	NA	IMG_8341.JPG_thresh.jpg	95.9	Scarp forest edge	Edge
167	Plot22	Plot22_S12	S12	Edge	NA	NA	NA	NA	NA	NA	NA	NA	NA	NA	NA	NA	NA	NA	NA	NA	NA	NA	NA	NA	NA	NA	NA	NA	NA	NA	NA	IMG_8342.JPG_thresh.jpg	90.9	Scarp forest edge	Edge
168	Plot22	Plot22_S13	S13	Edge	NA	NA	NA	NA	NA	NA	NA	NA	NA	NA	NA	NA	NA	NA	NA	NA	NA	NA	NA	NA	NA	NA	NA	NA	NA	NA	NA	IMG_8343.JPG_thresh.jpg	87.1	Scarp forest edge	Edge
169	Plot24	Plot24_S01	S01	Forest	2018_0413_081030_S01_G_CALIBRATED.JPG	-0.335862869	0	0.473772909	0.5	-1	3277808	2018_0413_081037_014S01_S_CALIBRATED.JPG	0.025839568	0	0.634011584	1	-1	8233392	Record_2018-04-13_08-22-S01.csv	21.150848	21.16	0.321764769	22.08	20.17	22500	21.0982674	21.07	0.33671877	22.19	20.14	31144	IMG_8345_S01.JPG_thresh.jpg	97.6	Scarp forest	Forest
170	Plot24	Plot24_S02	S02	Forest	2018_0413_081113_S02_G_CALIBRATED.JPG	-0.409567313	0	0.474916908	1	-1	3049784	2018_0413_081120_S02_S_CALIBRATED.JPG	-0.043164584	0	0.448428782	1	-1	8259842	Record_2018-04-13_08-23-S02.csv	20.31365689	20.2	0.480301165	22.19	19.23	22500	20.20746687	20.09	0.444127347	22.22	19.23	65192	IMG_8346_S02.JPG_thresh.jpg	95.2	Scarp forest	Forest
171	Plot24	Plot24_S03	S03	Forest	2018_0413_081203_S03_G_CALIBRATED.JPG	-0.19184055	0	0.42355463	1	-1	2967766	2018_0413_081210_S03_S_CALIBRATED.JPG	0.029975845	0	0.536312555	1	-1	8245493	Record_2018-04-13_08-24-S03.csv	21.01344444	20.96	0.331765347	22.71	20.03	22500	20.95262333	20.9	0.302162677	22.71	20.03	45084	IMG_8347_S03.JPG_thresh.jpg	85.9	Scarp forest	Forest
172	Plot24	Plot24_S04	S04	Forest	2018_0413_081241_S04_G_CALIBRATED.JPG	-0.322077988	0	0.468233241	1	-1	2966576	2018_0413_081249_S04_S_CALIBRATED.JPG	0.003798855	0	0.55828981	1	-1	8245625	Record_2018-04-13_08-26-S04.csv	20.19549067	20.17	0.416544355	21.38	19.26	22500	20.39396209	20.37	0.509961757	22.91	19.26	63474	IMG_8348_S04.JPG_thresh.jpg	53.9	Scarp forest	Forest
173	Plot24	Plot24_S05	S05	Forest	2018_0413_080956_S05_G_CALIBRATED.JPG	-0.366264518	0	0.471394491	1	-1	3066294	2018_0413_081003_S05_S_CALIBRATED.JPG	-0.0653934	0	0.522513864	1	-1	8252024	Record_2018-04-13_08-21-S05.csv	21.16673689	20.96	0.714985931	24.89	20	22500	21.51479737	21.3	0.979988605	25.96	19.86	59247	IMG_8344_S05.JPG_thresh.jpg	61.4	Scarp forest	Forest
174	Plot24	Plot24_S06	S06	Forest	NA	NA	NA	NA	NA	NA	NA	NA	NA	NA	NA	NA	NA	NA	NA	NA	NA	NA	NA	NA	NA	NA	NA	NA	NA	NA	NA	IMG_8349.JPG_thresh.jpg	93.2	Scarp forest	Forest
175	Plot24	Plot24_S07	S07	Forest	NA	NA	NA	NA	NA	NA	NA	NA	NA	NA	NA	NA	NA	NA	NA	NA	NA	NA	NA	NA	NA	NA	NA	NA	NA	NA	NA	IMG_8350.JPG_thresh.jpg	96.5	Scarp forest	Forest
176	Plot24	Plot24_S08	S08	Forest	NA	NA	NA	NA	NA	NA	NA	NA	NA	NA	NA	NA	NA	NA	NA	NA	NA	NA	NA	NA	NA	NA	NA	NA	NA	NA	NA	IMG_8351.JPG_thresh.jpg	97.9	Scarp forest	Forest
177	Plot24	Plot24_S09	S09	Forest	NA	NA	NA	NA	NA	NA	NA	NA	NA	NA	NA	NA	NA	NA	NA	NA	NA	NA	NA	NA	NA	NA	NA	NA	NA	NA	NA	IMG_8352.JPG_thresh.jpg	81.9	Scarp forest	Forest
178	Plot24	Plot24_S10	S10	Forest	NA	NA	NA	NA	NA	NA	NA	NA	NA	NA	NA	NA	NA	NA	NA	NA	NA	NA	NA	NA	NA	NA	NA	NA	NA	NA	NA	IMG_8353.JPG_thresh.jpg	94.4	Scarp forest	Forest
179	Plot24	Plot24_S11	S11	Forest	NA	NA	NA	NA	NA	NA	NA	NA	NA	NA	NA	NA	NA	NA	NA	NA	NA	NA	NA	NA	NA	NA	NA	NA	NA	NA	NA	IMG_8354.JPG_thresh.jpg	91.7	Scarp forest	Forest
180	Plot24	Plot24_S12	S12	Forest	NA	NA	NA	NA	NA	NA	NA	NA	NA	NA	NA	NA	NA	NA	NA	NA	NA	NA	NA	NA	NA	NA	NA	NA	NA	NA	NA	IMG_8355.JPG_thresh.jpg	72	Scarp forest	Forest
181	Plot24	Plot24_S13	S13	Forest	NA	NA	NA	NA	NA	NA	NA	NA	NA	NA	NA	NA	NA	NA	NA	NA	NA	NA	NA	NA	NA	NA	NA	NA	NA	NA	NA	IMG_8356.JPG_thresh.jpg	71.5	Scarp forest	Forest
182	Plot24	Plot24_S14	S14	Forest	NA	NA	NA	NA	NA	NA	NA	NA	NA	NA	NA	NA	NA	NA	NA	NA	NA	NA	NA	NA	NA	NA	NA	NA	NA	NA	NA	IMG_8357.JPG_thresh.jpg	95	Scarp forest	Forest
183	Plot24	Plot24_S15	S15	Forest	NA	NA	NA	NA	NA	NA	NA	NA	NA	NA	NA	NA	NA	NA	NA	NA	NA	NA	NA	NA	NA	NA	NA	NA	NA	NA	NA	IMG_8358.JPG_thresh.jpg	91	Scarp forest	Forest
184	Plot24	Plot24_S16	S16	Forest	NA	NA	NA	NA	NA	NA	NA	NA	NA	NA	NA	NA	NA	NA	NA	NA	NA	NA	NA	NA	NA	NA	NA	NA	NA	NA	NA	IMG_8359.JPG_thresh.jpg	78.4	Scarp forest	Forest
185	Plot24	Plot24_S17	S17	Forest	NA	NA	NA	NA	NA	NA	NA	NA	NA	NA	NA	NA	NA	NA	NA	NA	NA	NA	NA	NA	NA	NA	NA	NA	NA	NA	NA	IMG_8360.JPG_thresh.jpg	89.5	Scarp forest	Forest
186	Plot25	Plot25_S01	S01	Edge	2018_0413_083447_S01_G_CALIBRATED.JPG	0.163479911	0	0.325357212	1	-1	3132758	2018_0413_083452_S01_S_CALIBRATED.JPG	0.288580236	0.333333333	0.380757928	1	-1	8291268	Record_2018-04-13_08-44-S01.csv	21.524496	21.6	0.68200609	22.8	19.8	22500	21.3378961	21.35	0.648848538	23.04	19.6	57750	IMG_8366_S01.JPG_thresh.jpg	69.1	Scarp forest edge	Edge
187	Plot25	Plot25_S02	S02	Edge	2018_0413_083248_S02_G_CALIBRATED.JPG	0.137835432	0	0.290619121	1	-1	3082051	2018_0413_083314_S02_S_CALIBRATED.JPG	0.365957564	0.5	0.33126135	1	-1	8286172	Record_2018-04-13_08-43-S02.csv	21.70116667	21.66	0.585011617	23.43	20.45	22500	21.94560331	21.97	0.664035463	23.59	20.43	54450	IMG_8363_S02.JPG_thresh.jpg	91.9	Scarp forest edge	Edge
188	Plot25	Plot25_S03	S03	Edge	2018_0413_083333_S03_G_CALIBRATED.JPG	0.195043777	0	0.389198264	1	-1	2199636	2018_0413_083344_S03_S_CALIBRATED.JPG	0.480680663	0.5	0.507366061	1	-1	8262187	Record_2018-04-13_08-43-S03.csv	21.86567956	22.02	0.658780223	23.34	20.28	22500	21.76638763	21.74	0.715258556	23.56	20.26	58928	IMG_8364_S03.JPG_thresh.jpg	97.5	Scarp forest edge	Edge
189	Plot25	Plot25_S04	S04	Edge	2018_0413_083407_S04_G_CALIBRATED.JPG	0.195609213	0	0.325816277	1	-1	3292455	2018_0413_083423_S04_S_CALIBRATED.JPG	0.068965233	0.125	0.330375028	1	-1	8293846	Record_2018-04-13_08-44-S04.csv	21.345328	21.44	0.747873002	23.26	19.49	22500	21.50363812	21.58	0.81568344	24.59	19.49	65314	IMG_8365_S04.JPG_thresh.jpg	85.4	Scarp forest edge	Edge
190	Plot25	Plot25_S05	S05	Edge	2018_0413_083212_S05_G_CALIBRATED.JPG	0.168805389	0	0.361626761	1	-1	3665537	2018_0413_083216_S05_S_CALIBRATED.JPG	0.26143281	0.285714286	0.292325408	1	-1	8262317	Record_2018-04-13_08-42-S05.csv	21.43389511	21.49	0.680139405	23.07	19.83	22500	21.33356892	21.35	0.608425844	23.29	19.8	64860	IMG_8362_S05.JPG_thresh.jpg	92.2	Scarp forest edge	Edge
191	Plot25	Plot25_S06	S06	Edge	NA	NA	NA	NA	NA	NA	NA	NA	NA	NA	NA	NA	NA	NA	NA	NA	NA	NA	NA	NA	NA	NA	NA	NA	NA	NA	NA	IMG_8367.JPG_thresh.jpg	64.9	Scarp forest edge	Edge
192	Plot25	Plot25_S07	S07	Edge	NA	NA	NA	NA	NA	NA	NA	NA	NA	NA	NA	NA	NA	NA	NA	NA	NA	NA	NA	NA	NA	NA	NA	NA	NA	NA	NA	IMG_8368.JPG_thresh.jpg	77.1	Scarp forest edge	Edge
193	Plot25	Plot25_S08	S08	Edge	NA	NA	NA	NA	NA	NA	NA	NA	NA	NA	NA	NA	NA	NA	NA	NA	NA	NA	NA	NA	NA	NA	NA	NA	NA	NA	NA	IMG_8369.JPG_thresh.jpg	75.2	Scarp forest edge	Edge
194	Plot25	Plot25_S09	S09	Edge	NA	NA	NA	NA	NA	NA	NA	NA	NA	NA	NA	NA	NA	NA	NA	NA	NA	NA	NA	NA	NA	NA	NA	NA	NA	NA	NA	IMG_8370.JPG_thresh.jpg	86.3	Scarp forest edge	Edge
195	Plot25	Plot25_S10	S10	Edge	NA	NA	NA	NA	NA	NA	NA	NA	NA	NA	NA	NA	NA	NA	NA	NA	NA	NA	NA	NA	NA	NA	NA	NA	NA	NA	NA	IMG_8371.JPG_thresh.jpg	99	Scarp forest edge	Edge
196	Plot25	Plot25_S11	S11	Edge	NA	NA	NA	NA	NA	NA	NA	NA	NA	NA	NA	NA	NA	NA	NA	NA	NA	NA	NA	NA	NA	NA	NA	NA	NA	NA	NA	IMG_8372.JPG_thresh.jpg	66	Scarp forest edge	Edge
197	Plot25	Plot25_S12	S12	Edge	NA	NA	NA	NA	NA	NA	NA	NA	NA	NA	NA	NA	NA	NA	NA	NA	NA	NA	NA	NA	NA	NA	NA	NA	NA	NA	NA	IMG_8373.JPG_thresh.jpg	7.6	Scarp forest edge	Edge
198	Plot25	Plot25_S13	S13	Edge	NA	NA	NA	NA	NA	NA	NA	NA	NA	NA	NA	NA	NA	NA	NA	NA	NA	NA	NA	NA	NA	NA	NA	NA	NA	NA	NA	IMG_8374.JPG_thresh.jpg	0	Scarp forest edge	Edge
199	Plot25	Plot25_S14	S14	Edge	NA	NA	NA	NA	NA	NA	NA	NA	NA	NA	NA	NA	NA	NA	NA	NA	NA	NA	NA	NA	NA	NA	NA	NA	NA	NA	NA	IMG_8375.JPG_thresh.jpg	0	Scarp forest edge	Edge
200	Plot27	Plot27_S01	S01	Forest	2018_0413_092909_S01_G_CALIBRATED.JPG	-0.106001864	-0.111111111	0.099035511	1	-1	2312313	2018_0413_092916_S01_S_CALIBRATED.JPG	0.106239665	0	0.625948402	1	-1	8224302	Record_2018-04-13_09-39-S01.csv	21.68124756	21.77	0.700694851	23.18	19.69	22500	21.65674982	21.69	0.711933034	23.4	19.69	68150	IMG_8400_S01.JPG_thresh.jpg	82.7	Scarp forest	Forest
201	Plot27	Plot27_S02	S02	Forest	2018_0413_093025_S02_G_CALIBRATED.JPG	-0.103639618	-0.111111111	0.105136827	1	-1	1642629	2018_0413_093030_S02_S_CALIBRATED.JPG	-0.063952903	0	0.62536067	1	-1	8230431	Record_2018-04-13_09-40-S02.csv	20.95793511	20.76	0.760476505	23.62	19.57	22500	21.19801411	21.13	0.764536681	23.7	19.57	69042	IMG_8401_S02.JPG_thresh.jpg	90.3	Scarp forest	Forest
202	Plot27	Plot27_S03	S03	Forest	2018_0413_093100_S03_G_CALIBRATED.JPG	-0.113649207	-0.111111111	0.082243875	1	-1	2092886	2018_0413_093107_S03_S_CALIBRATED.JPG	0.068969768	0	0.653841872	1	-1	8217852	Record_2018-04-13_09-41-S03.csv	22.17724533	22.3	0.691592371	23.7	20.09	22500	21.99293626	22.08	0.708937286	23.7	19.89	67620	IMG_8402_S03.JPG_thresh.jpg	95.8	Scarp forest	Forest
203	Plot27	Plot27_S04	S04	Forest	2018_0413_093138_S04_G_CALIBRATED.JPG	-0.110380299	-0.111111111	0.088493547	1	-1	2782360	2018_0413_093144_S04_S_CALIBRATED.JPG	-0.301470962	0	0.473228926	1	-1	8286098	Record_2018-04-13_09-42-S04.csv	22.03647511	22.02	0.648621919	23.45	20.43	22500	21.85810564	21.86	0.619811498	23.51	20.37	56019	IMG_8403_S04.JPG_thresh.jpg	69.5	Scarp forest	Forest
204	Plot27	Plot27_S05	S05	Forest	2018_0413_092825_S05_G_CALIBRATED.JPG	-0.107526513	-0.111111111	0.096072748	1	-1	3112822	2018_0413_092833_S05_S_CALIBRATED.JPG	0.155561997	0	0.636152491	1	-1	8219556	Record_2018-04-13_09-39-S05.csv	21.55042267	21.49	0.438141907	23.04	20.48	22500	21.36271704	21.3	0.45437269	23.59	20.11	68593	IMG_8399_S05.JPG_thresh.jpg	96.6	Scarp forest	Forest
205	Plot27	Plot27_S06	S06	Forest	NA	NA	NA	NA	NA	NA	NA	NA	NA	NA	NA	NA	NA	NA	NA	NA	NA	NA	NA	NA	NA	NA	NA	NA	NA	NA	NA	IMG_8404.JPG_thresh.jpg	93	Scarp forest	Forest
206	Plot27	Plot27_S07	S07	Forest	NA	NA	NA	NA	NA	NA	NA	NA	NA	NA	NA	NA	NA	NA	NA	NA	NA	NA	NA	NA	NA	NA	NA	NA	NA	NA	NA	IMG_8405.JPG_thresh.jpg	83.1	Scarp forest	Forest
207	Plot27	Plot27_S08	S08	Forest	NA	NA	NA	NA	NA	NA	NA	NA	NA	NA	NA	NA	NA	NA	NA	NA	NA	NA	NA	NA	NA	NA	NA	NA	NA	NA	NA	IMG_8406.JPG_thresh.jpg	91.8	Scarp forest	Forest
208	Plot27	Plot27_S09	S09	Forest	NA	NA	NA	NA	NA	NA	NA	NA	NA	NA	NA	NA	NA	NA	NA	NA	NA	NA	NA	NA	NA	NA	NA	NA	NA	NA	NA	IMG_8407.JPG_thresh.jpg	92.2	Scarp forest	Forest
209	Plot27	Plot27_S10	S10	Forest	NA	NA	NA	NA	NA	NA	NA	NA	NA	NA	NA	NA	NA	NA	NA	NA	NA	NA	NA	NA	NA	NA	NA	NA	NA	NA	NA	IMG_8408.JPG_thresh.jpg	82.1	Scarp forest	Forest
210	Plot27	Plot27_S11	S11	Forest	NA	NA	NA	NA	NA	NA	NA	NA	NA	NA	NA	NA	NA	NA	NA	NA	NA	NA	NA	NA	NA	NA	NA	NA	NA	NA	NA	IMG_8409.JPG_thresh.jpg	95.9	Scarp forest	Forest
211	Plot27	Plot27_S12	S12	Forest	NA	NA	NA	NA	NA	NA	NA	NA	NA	NA	NA	NA	NA	NA	NA	NA	NA	NA	NA	NA	NA	NA	NA	NA	NA	NA	NA	IMG_8410.JPG_thresh.jpg	92.7	Scarp forest	Forest
212	Plot27	Plot27_S13	S13	Forest	NA	NA	NA	NA	NA	NA	NA	NA	NA	NA	NA	NA	NA	NA	NA	NA	NA	NA	NA	NA	NA	NA	NA	NA	NA	NA	NA	IMG_8411.JPG_thresh.jpg	76.1	Scarp forest	Forest
213	Plot27	Plot27_S14	S14	Forest	NA	NA	NA	NA	NA	NA	NA	NA	NA	NA	NA	NA	NA	NA	NA	NA	NA	NA	NA	NA	NA	NA	NA	NA	NA	NA	NA	IMG_8412.JPG_thresh.jpg	96.9	Scarp forest	Forest
214	Plot28	Plot28_S01	S01	Edge	2018_0413_094650_S01_G_CALIBRATED.JPG	0.325299172	0.333333333	0.330432958	1	-1	3430549	2018_0413_094657_S01_S_CALIBRATED.JPG	0.445760894	0.5	0.312174954	1	-1	8292716	Record_2018-04-13_09-58-S01.csv	23.260792	23.23	0.974729409	25.4	20.96	22500	23.89878468	24.08	1.046488537	25.82	20.96	71298	IMG_8415_S01.JPG_thresh.jpg	92.2	Scarp forest edge	Edge
215	Plot28	Plot28_S02	S02	Edge	2018_0413_094717_S02_G_CALIBRATED.JPG	0.39352234	0.5	0.411562165	1	-1	3760106	2018_0413_094723_S02_S_CALIBRATED.JPG	0.443653067	0.5	0.289859937	1	-1	8294165	Record_2018-04-13_09-58-S02.csv	22.88213778	22.71	1.076770266	25.34	20.71	22500	23.067151	22.96	0.99029347	25.42	20.71	62601	IMG_8416_S02.JPG_thresh.jpg	70.9	Scarp forest edge	Edge
216	Plot28	Plot28_S03	S03	Edge	2018_0413_094745_S03_G_CALIBRATED.JPG	0.296376183	0.333333333	0.341610181	1	-1	3471462	2018_0413_094751_S03_S_CALIBRATED.JPG	0.482857783	0.5	0.355215815	1	-1	8289655	Record_2018-04-13_09-59-S03.csv	24.07959111	24.29	0.848422475	26.09	21.35	22500	24.05627307	24.11	0.871249263	28.44	21.35	69690	IMG_8417_S03.JPG_thresh.jpg	92.8	Scarp forest edge	Edge
217	Plot28	Plot28_S04	S04	Edge	2018_0413_094814_S04_G_CALIBRATED.JPG	0.443118864	0.5	0.431737526	1	-1	3403170	2018_0413_094821_S04_S_CALIBRATED.JPG	0.275086135	0.428571429	0.428682435	1	-1	8294397	Record_2018-04-13_09-59-S04.csv	23.31389067	23.37	0.637191959	24.7	21.13	22500	23.3863836	23.45	0.732926179	25.34	21.02	69984	IMG_8418_S04.JPG_thresh.jpg	75.5	Scarp forest edge	Edge
218	Plot28	Plot28_S05	S05	Edge	2018_0413_094626_S05_G_CALIBRATED.JPG	0.380203077	0.333333333	0.409148187	1	-1	3225373	2018_0413_094632_S05_S_CALIBRATED.JPG	0.47315761	0.5	0.299927769	1	-1	8293827	Record_2018-04-13_09-57-S05.csv	24.50663556	24.67	0.968675927	30.46	21.47	22500	24.41755967	24.56	0.818192295	27.79	21.47	55640	IMG_8414_S05.JPG_thresh.jpg	86.3	Scarp forest edge	Edge
219	Plot28	Plot28_S06	S06	Edge	NA	NA	NA	NA	NA	NA	NA	NA	NA	NA	NA	NA	NA	NA	NA	NA	NA	NA	NA	NA	NA	NA	NA	NA	NA	NA	NA	IMG_8419.JPG_thresh.jpg	2.1	Scarp forest edge	Edge
220	Plot28	Plot28_S07	S07	Edge	NA	NA	NA	NA	NA	NA	NA	NA	NA	NA	NA	NA	NA	NA	NA	NA	NA	NA	NA	NA	NA	NA	NA	NA	NA	NA	NA	IMG_8420.JPG_thresh.jpg	0	Scarp forest edge	Edge
221	Plot28	Plot28_S08	S08	Edge	NA	NA	NA	NA	NA	NA	NA	NA	NA	NA	NA	NA	NA	NA	NA	NA	NA	NA	NA	NA	NA	NA	NA	NA	NA	NA	NA	IMG_8421.JPG_thresh.jpg	0	Scarp forest edge	Edge
222	Plot28	Plot28_S09	S09	Edge	NA	NA	NA	NA	NA	NA	NA	NA	NA	NA	NA	NA	NA	NA	NA	NA	NA	NA	NA	NA	NA	NA	NA	NA	NA	NA	NA	IMG_8422.JPG_thresh.jpg	0	Scarp forest edge	Edge
223	Plot28	Plot28_S10	S10	Edge	NA	NA	NA	NA	NA	NA	NA	NA	NA	NA	NA	NA	NA	NA	NA	NA	NA	NA	NA	NA	NA	NA	NA	NA	NA	NA	NA	IMG_8423.JPG_thresh.jpg	92.1	Scarp forest edge	Edge
224	Plot28	Plot28_S11	S11	Edge	NA	NA	NA	NA	NA	NA	NA	NA	NA	NA	NA	NA	NA	NA	NA	NA	NA	NA	NA	NA	NA	NA	NA	NA	NA	NA	NA	IMG_8424.JPG_thresh.jpg	93.1	Scarp forest edge	Edge
225	Plot28	Plot28_S12	S12	Edge	NA	NA	NA	NA	NA	NA	NA	NA	NA	NA	NA	NA	NA	NA	NA	NA	NA	NA	NA	NA	NA	NA	NA	NA	NA	NA	NA	IMG_8425.JPG_thresh.jpg	97.2	Scarp forest edge	Edge
226	Plot28	Plot28_S13	S13	Edge	NA	NA	NA	NA	NA	NA	NA	NA	NA	NA	NA	NA	NA	NA	NA	NA	NA	NA	NA	NA	NA	NA	NA	NA	NA	NA	NA	IMG_8426.JPG_thresh.jpg	83.2	Scarp forest edge	Edge
227	Plot28	Plot28_S14	S14	Edge	NA	NA	NA	NA	NA	NA	NA	NA	NA	NA	NA	NA	NA	NA	NA	NA	NA	NA	NA	NA	NA	NA	NA	NA	NA	NA	NA	IMG_8427.JPG_thresh.jpg	91.4	Scarp forest edge	Edge
228	Plot28	Plot28_S15	S15	Edge	NA	NA	NA	NA	NA	NA	NA	NA	NA	NA	NA	NA	NA	NA	NA	NA	NA	NA	NA	NA	NA	NA	NA	NA	NA	NA	NA	IMG_8428.JPG_thresh.jpg	88.5	Scarp forest edge	Edge
229	Plot28	Plot28_S16	S16	Edge	NA	NA	NA	NA	NA	NA	NA	NA	NA	NA	NA	NA	NA	NA	NA	NA	NA	NA	NA	NA	NA	NA	NA	NA	NA	NA	NA	IMG_8429.JPG_thresh.jpg	89.6	Scarp forest edge	Edge
230	Plot3	Plot3_S01	S01	Forest	2018_0411_110337_S01_G_CALIBRATED.JPG	0.883924674	1	0.19589716	1	-1	2932603	2018_0411_110348_S01_S_CALIBRATED.JPG	0.738723434	0.75	0.226551479	1	-1	8293920	Record_2018-04-11_11-24-S01.csv	22.39999022	22.38	0.269291756	23.59	21.6	22500	22.49487	22.49	0.189191869	23.26	21.86	40809	IMG_8058_S01.JPG_thresh.jpg	97.2	Coastal lowland forest	Forest
231	Plot3	Plot3_S02	S02	Forest	2018_0411_110505_S02_G_CALIBRATED.JPG	0.863141164	1	0.197331142	1	-1	3489113	2018_0411_110519_S02_S_CALIBRATED.JPG	0.688977963	0.75	0.331277331	1	-1	8293678	Record_2018-04-11_11-25-S02.csv	21.81451689	21.83	0.25805042	22.69	20.93	22500	21.90827973	21.91	0.225472649	22.71	21.1	64170	IMG_8059_S02.JPG_thresh.jpg	67.4	Coastal lowland forest	Forest
232	Plot3	Plot3_S03	S03	Forest	2018_0411_110634_S03_G_CALIBRATED.JPG	0.776174834	0.75	0.186512041	1	-1	2100972	2018_0411_110643_S03_S_CALIBRATED.JPG	0.728465752	0.764705882	0.232004005	1	-1	8294400	Record_2018-04-11_11-27-S03.csv	21.757384	21.8	0.39984243	22.77	20.71	22500	21.79123147	21.8	0.399286644	23.1	20.71	64167	IMG_8060_S03.JPG_thresh.jpg	90	Coastal lowland forest	Forest
233	Plot3	Plot3_S04	S04	Forest	2018_0411_110734_S04_G_CALIBRATED.JPG	0.790669647	0.75	0.192776233	1	-1	3510432	2018_0411_110741_S04_S_CALIBRATED.JPG	0.76788838	0.777777778	0.196707406	1	-1	8294398	Record_2018-04-11_11-28-S04.csv	21.67771778	21.72	0.261935659	22.33	20.71	22500	21.55806865	21.6	0.318961341	22.52	20.2	58560	IMG_8061_S04.JPG_thresh.jpg	74.1	Coastal lowland forest	Forest
234	Plot3	Plot3_S05	S05	Forest	2018_0411_110845_S05_G_CALIBRATED.JPG	0.77026319	0.75	0.188475144	1	-1	2505734	2018_0411_110853_S05_S_CALIBRATED.JPG	0.75131242	0.783783784	0.239704648	1	-1	8294398	Record_2018-04-11_11-23-S05.csv	23.107328	23.18	0.317859228	23.81	22.11	22500	23.03522934	23.07	0.310804299	23.94	21.97	61830	IMG_8062_S05.JPG_thresh.jpg	63.9	Coastal lowland forest	Forest
235	Plot3	Plot3_S06	S06	Forest	NA	NA	NA	NA	NA	NA	NA	NA	NA	NA	NA	NA	NA	NA	NA	NA	NA	NA	NA	NA	NA	NA	NA	NA	NA	NA	NA	IMG_8063.JPG_thresh.jpg	93.4	Coastal lowland forest	Forest
236	Plot3	Plot3_S07	S07	Forest	NA	NA	NA	NA	NA	NA	NA	NA	NA	NA	NA	NA	NA	NA	NA	NA	NA	NA	NA	NA	NA	NA	NA	NA	NA	NA	NA	IMG_8064.JPG_thresh.jpg	88.2	Coastal lowland forest	Forest
237	Plot3	Plot3_S08	S08	Forest	NA	NA	NA	NA	NA	NA	NA	NA	NA	NA	NA	NA	NA	NA	NA	NA	NA	NA	NA	NA	NA	NA	NA	NA	NA	NA	NA	IMG_8065.JPG_thresh.jpg	95.5	Coastal lowland forest	Forest
238	Plot3	Plot3_S09	S09	Forest	NA	NA	NA	NA	NA	NA	NA	NA	NA	NA	NA	NA	NA	NA	NA	NA	NA	NA	NA	NA	NA	NA	NA	NA	NA	NA	NA	IMG_8066.JPG_thresh.jpg	77.9	Coastal lowland forest	Forest
239	Plot3	Plot3_S10	S10	Forest	NA	NA	NA	NA	NA	NA	NA	NA	NA	NA	NA	NA	NA	NA	NA	NA	NA	NA	NA	NA	NA	NA	NA	NA	NA	NA	NA	IMG_8067.JPG_thresh.jpg	92.5	Coastal lowland forest	Forest
240	Plot3	Plot3_S11	S11	Forest	NA	NA	NA	NA	NA	NA	NA	NA	NA	NA	NA	NA	NA	NA	NA	NA	NA	NA	NA	NA	NA	NA	NA	NA	NA	NA	NA	IMG_8068.JPG_thresh.jpg	95.3	Coastal lowland forest	Forest
241	Plot3	Plot3_S12	S12	Forest	NA	NA	NA	NA	NA	NA	NA	NA	NA	NA	NA	NA	NA	NA	NA	NA	NA	NA	NA	NA	NA	NA	NA	NA	NA	NA	NA	IMG_8069.JPG_thresh.jpg	84.8	Coastal lowland forest	Forest
242	Plot3	Plot3_S13	S13	Forest	NA	NA	NA	NA	NA	NA	NA	NA	NA	NA	NA	NA	NA	NA	NA	NA	NA	NA	NA	NA	NA	NA	NA	NA	NA	NA	NA	IMG_8070.JPG_thresh.jpg	94.5	Coastal lowland forest	Forest
243	Plot3	Plot3_S14	S14	Forest	NA	NA	NA	NA	NA	NA	NA	NA	NA	NA	NA	NA	NA	NA	NA	NA	NA	NA	NA	NA	NA	NA	NA	NA	NA	NA	NA	IMG_8071.JPG_thresh.jpg	72.3	Coastal lowland forest	Forest
244	Plot30	Plot30_S01	S01	Forest	2018_0413_103938_S01_G_CALIBRATED.JPG	0.055999588	0	0.230312913	1	-0.333333333	2838378	2018_0413_103943_S01_S_CALIBRATED.JPG	0.281155907	0.333333333	0.488858176	1	-1	8285195	Record_2018-04-13_10-50-S01.csv	22.89710044	22.895	0.73134436	24.73	21.3	22500	23.14063974	23.18	0.772893072	25.18	21.16	52740	IMG_8432_S01.JPG_thresh.jpg	97.6	Scarp forest	Forest
245	Plot30	Plot30_S02	S02	Forest	2018_0413_104052_S02_G_CALIBRATED.JPG	0.048608444	0	0.218236629	1	-1	2454051	2018_0413_104058_S02_S_CALIBRATED.JPG	0.033241888	0.142857143	0.539620347	1	-1	8289292	Record_2018-04-13_10-52-S02.csv	22.85661644	22.88	0.591664085	24.62	21.13	22500	22.9251229	22.93	0.75069981	25.45	20.9	63384	IMG_8433_S02.JPG_thresh.jpg	13	Scarp forest	Forest
246	Plot30	Plot30_S03	S03	Forest	2018_0413_104129_S03_G_CALIBRATED.JPG	0.018346565	0	0.134145735	1	-1	2365880	2018_0413_104135_S03_S_CALIBRATED.JPG	-0.084498429	-0.090909091	0.146534029	0.733333333	-0.80952381	8294400	Record_2018-04-13_10-54-S03.csv	23.61193644	23.67	0.681382725	25.13	21.55	22500	24.08617126	24.19	0.845422307	25.9	21.41	53357	IMG_8434_S03.JPG_thresh.jpg	93.7	Scarp forest	Forest
247	Plot30	Plot30_S04	S04	Forest	2018_0413_104156_S04_G_CALIBRATED.JPG	0.018709093	0	0.1357283	1	-0.333333333	2598095	2018_0413_104201_S04_S_CALIBRATED.JPG	0.353347272	0.142857143	0.541321854	1	-1	8262235	Record_2018-04-13_10-54-S04.csv	24.22504711	24.4	0.687621526	25.37	21.13	22500	24.12663963	24.29	0.694489289	25.4	21.05	52640	IMG_8435_S04.JPG_thresh.jpg	98.4	Scarp forest	Forest
248	Plot30	Plot30_S05	S05	Forest	2018_0413_103856_S05_G_CALIBRATED.JPG	0.047363108	0	0.212840204	1	-0.333333333	2996615	2018_0413_103903_S05_S_CALIBRATED.JPG	0.323504696	0.333333333	0.441096019	1	-1	8287137	Record_2018-04-13_10-48-S05.csv	23.58422089	23.67	0.861481901	25.21	21.07	22500	23.53371978	23.53	0.753564704	25.53	21.07	71980	IMG_8431_S05.JPG_thresh.jpg	72.8	Scarp forest	Forest
249	Plot30	Plot30_S06	S06	Forest	NA	NA	NA	NA	NA	NA	NA	NA	NA	NA	NA	NA	NA	NA	NA	NA	NA	NA	NA	NA	NA	NA	NA	NA	NA	NA	NA	IMG_8436.JPG_thresh.jpg	85.1	Scarp forest	Forest
250	Plot30	Plot30_S07	S07	Forest	NA	NA	NA	NA	NA	NA	NA	NA	NA	NA	NA	NA	NA	NA	NA	NA	NA	NA	NA	NA	NA	NA	NA	NA	NA	NA	NA	IMG_8437.JPG_thresh.jpg	68.3	Scarp forest	Forest
251	Plot30	Plot30_S08	S08	Forest	NA	NA	NA	NA	NA	NA	NA	NA	NA	NA	NA	NA	NA	NA	NA	NA	NA	NA	NA	NA	NA	NA	NA	NA	NA	NA	NA	IMG_8438.JPG_thresh.jpg	99.6	Scarp forest	Forest
252	Plot30	Plot30_S09	S09	Forest	NA	NA	NA	NA	NA	NA	NA	NA	NA	NA	NA	NA	NA	NA	NA	NA	NA	NA	NA	NA	NA	NA	NA	NA	NA	NA	NA	IMG_8439.JPG_thresh.jpg	96.1	Scarp forest	Forest
253	Plot30	Plot30_S10	S10	Forest	NA	NA	NA	NA	NA	NA	NA	NA	NA	NA	NA	NA	NA	NA	NA	NA	NA	NA	NA	NA	NA	NA	NA	NA	NA	NA	NA	IMG_8440.JPG_thresh.jpg	81.9	Scarp forest	Forest
254	Plot30	Plot30_S11	S11	Forest	NA	NA	NA	NA	NA	NA	NA	NA	NA	NA	NA	NA	NA	NA	NA	NA	NA	NA	NA	NA	NA	NA	NA	NA	NA	NA	NA	IMG_8441.JPG_thresh.jpg	98.4	Scarp forest	Forest
255	Plot30	Plot30_S12	S12	Forest	NA	NA	NA	NA	NA	NA	NA	NA	NA	NA	NA	NA	NA	NA	NA	NA	NA	NA	NA	NA	NA	NA	NA	NA	NA	NA	NA	IMG_8442.JPG_thresh.jpg	79.3	Scarp forest	Forest
256	Plot30	Plot30_S13	S13	Forest	NA	NA	NA	NA	NA	NA	NA	NA	NA	NA	NA	NA	NA	NA	NA	NA	NA	NA	NA	NA	NA	NA	NA	NA	NA	NA	NA	IMG_8443.JPG_thresh.jpg	99.6	Scarp forest	Forest
257	Plot30	Plot30_S14	S14	Forest	NA	NA	NA	NA	NA	NA	NA	NA	NA	NA	NA	NA	NA	NA	NA	NA	NA	NA	NA	NA	NA	NA	NA	NA	NA	NA	NA	IMG_8444.JPG_thresh.jpg	99.5	Scarp forest	Forest
258	Plot30	Plot30_S15	S15	Forest	NA	NA	NA	NA	NA	NA	NA	NA	NA	NA	NA	NA	NA	NA	NA	NA	NA	NA	NA	NA	NA	NA	NA	NA	NA	NA	NA	IMG_8445.JPG_thresh.jpg	90.7	Scarp forest	Forest
259	Plot31	Plot31_S01	S01	Edge	2018_0413_110052_S01_G_CALIBRATED.JPG	0.139616447	0	0.507521329	1	-1	2415193	NA	NA	NA	NA	NA	NA	NA	Record_2018-04-13_11-09-S01.csv	24.47794489	24.65	1.057929088	26.43	21.94	22500	24.30543672	24.4	1.080569496	26.43	21.83	64092	IMG_8449_S01.JPG_thresh.jpg	85.5	Scarp forest edge	Edge
260	Plot31	Plot31_S02	S02	Edge	2018_0413_110120_S02_G_CALIBRATED.JPG	-0.079230793	-0.090909091	0.235280998	1	-1	3290277	2018_0413_110129_S02_S_CALIBRATED.JPG	-0.181809535	-0.12	0.278796543	1	-1	8294400	Record_2018-04-13_11-09-S02.csv	28.02451067	28.13	0.951340546	31.54	24.13	22500	28.2612694	28.31	1.07898435	33.46	23.94	59280	IMG_8450_S02.JPG_thresh.jpg	88.6	Scarp forest edge	Edge
261	Plot31	Plot31_S03	S03	Edge	2018_0413_110150_S03_G_CALIBRATED.JPG	-0.081884192	-0.090909091	0.218626543	1	-1	2721079	2018_0413_110201_S03_S_CALIBRATED.JPG	-0.50449042	-0.545454545	0.22317109	0.833333333	-1	8294400	Record_2018-04-13_11-10-S03.csv	28.14282222	27.95	1.589441435	37.11	24	22500	27.89193651	27.79	1.285346433	37.11	23.78	62282	IMG_8451_S03.JPG_thresh.jpg	71.4	Scarp forest edge	Edge
262	Plot31	Plot31_S04	S04	Edge	2018_0413_110016_S04_G_CALIBRATED.JPG	0.110327261	0	0.506813113	1	-1	2285033	2018_0413_110022_S04_S_CALIBRATED.JPG	-0.42901734	-0.428571429	0.139360545	0.111111111	-0.821428571	8294400	Record_2018-04-13_11-08-S04.csv	25.31282	25.42	0.795283548	27.04	22.49	22500	25.19372973	25.32	0.707042175	27.09	22.49	70225	IMG_8452_S04.JPG_thresh.jpg	19.4	Scarp forest edge	Edge
263	Plot31	Plot31_S05	S05	Edge	2018_0413_105936_S05_G_CALIBRATED.JPG	0.184535998	0	0.528687463	1	-1	2033880	2018_0413_105942_S05_S_CALIBRATED.JPG	0.158115169	0	0.498662673	1	-1	8257041	Record_2018-04-13_11-07-S05.csv	24.69742311	24.91	0.865293793	26.3	22.13	22500	24.53201643	24.7	0.97469459	26.56	21.77	61480	IMG_8448_S05.JPG_thresh.jpg	91.9	Scarp forest edge	Edge
264	Plot31	Plot31_S06	S06	Edge	NA	NA	NA	NA	NA	NA	NA	NA	NA	NA	NA	NA	NA	NA	NA	NA	NA	NA	NA	NA	NA	NA	NA	NA	NA	NA	NA	IMG_8453.JPG_thresh.jpg	90.5	Scarp forest edge	Edge
265	Plot31	Plot31_S07	S07	Edge	NA	NA	NA	NA	NA	NA	NA	NA	NA	NA	NA	NA	NA	NA	NA	NA	NA	NA	NA	NA	NA	NA	NA	NA	NA	NA	NA	IMG_8454.JPG_thresh.jpg	68.2	Scarp forest edge	Edge
266	Plot31	Plot31_S08	S08	Edge	NA	NA	NA	NA	NA	NA	NA	NA	NA	NA	NA	NA	NA	NA	NA	NA	NA	NA	NA	NA	NA	NA	NA	NA	NA	NA	NA	IMG_8455.JPG_thresh.jpg	90	Scarp forest edge	Edge
267	Plot31	Plot31_S09	S09	Edge	NA	NA	NA	NA	NA	NA	NA	NA	NA	NA	NA	NA	NA	NA	NA	NA	NA	NA	NA	NA	NA	NA	NA	NA	NA	NA	NA	IMG_8456.JPG_thresh.jpg	93.3	Scarp forest edge	Edge
268	Plot31	Plot31_S10	S10	Edge	NA	NA	NA	NA	NA	NA	NA	NA	NA	NA	NA	NA	NA	NA	NA	NA	NA	NA	NA	NA	NA	NA	NA	NA	NA	NA	NA	IMG_8457.JPG_thresh.jpg	95.1	Scarp forest edge	Edge
269	Plot31	Plot31_S11	S11	Edge	NA	NA	NA	NA	NA	NA	NA	NA	NA	NA	NA	NA	NA	NA	NA	NA	NA	NA	NA	NA	NA	NA	NA	NA	NA	NA	NA	IMG_8458.JPG_thresh.jpg	85.3	Scarp forest edge	Edge
270	Plot31	Plot31_S12	S12	Edge	NA	NA	NA	NA	NA	NA	NA	NA	NA	NA	NA	NA	NA	NA	NA	NA	NA	NA	NA	NA	NA	NA	NA	NA	NA	NA	NA	IMG_8459.JPG_thresh.jpg	79.8	Scarp forest edge	Edge
271	Plot31	Plot31_S13	S13	Edge	NA	NA	NA	NA	NA	NA	NA	NA	NA	NA	NA	NA	NA	NA	NA	NA	NA	NA	NA	NA	NA	NA	NA	NA	NA	NA	NA	IMG_8460.JPG_thresh.jpg	87.2	Scarp forest edge	Edge
272	Plot31	Plot31_S14	S14	Edge	NA	NA	NA	NA	NA	NA	NA	NA	NA	NA	NA	NA	NA	NA	NA	NA	NA	NA	NA	NA	NA	NA	NA	NA	NA	NA	NA	IMG_8461.JPG_thresh.jpg	87.3	Scarp forest edge	Edge
273	Plot34	Plot34_S01	S01	Forest	2018_0415_073922_S01_G_CALIBRATED.JPG	0.44656021	0.5	0.273751654	1	-1	3144953	2018_0415_073927_S01_S_CALIBRATED.JPG	-0.013030593	-0.018867925	0.38617026	1	-1	8294400	Record_2018-04-15_07-47-29-S01.csv	24.41918889	24.48	0.273501404	25.08	23.4	22500	24.37662528	24.4	0.366233354	25.53	23.4	40596	IMG_8471_S01.JPG_thresh.jpg	0.1	Coastal lowland forest	Forest
274	Plot34	Plot34_S02	S02	Forest	2018_0415_074014_S02_G_CALIBRATED.JPG	0.562440963	0.555555556	0.291376505	1	-1	3273247	2018_0415_074020_S02_S_CALIBRATED.JPG	0.128025634	0.223880597	0.382696206	1	-1	8294400	Record_2018-04-15_07-48-09-S02.csv	24.62545333	24.62	0.253881926	25.56	23.83	22500	24.46523169	24.46	0.309225829	25.48	23.4	45320	IMG_8472_S02.JPG_thresh.jpg	33.1	Coastal lowland forest	Forest
275	Plot34	Plot34_S03	S03	Forest	2018_0415_074040_S03_G_CALIBRATED.JPG	0.58118886	0.555555556	0.327739834	1	-1	2982742	2018_0415_074047_S03_S_CALIBRATED.JPG	0.35338652	0.428571429	0.291308366	1	-1	8294400	Record_2018-04-15_07-48-48-S03.csv	24.01824933	24.02	0.182171998	24.62	23.34	22500	23.97030392	23.94	0.199794798	24.62	23.34	32870	IMG_8473_S03.JPG_thresh.jpg	68.9	Coastal lowland forest	Forest
276	Plot34	Plot34_S04	S04	Forest	2018_0415_073856_S04_G_CALIBRATED.JPG	0.543054805	0.5	0.295883797	1	-1	2784604	2018_0415_073903_S04_S_CALIBRATED.JPG	0.187838028	0.307692308	0.361055817	1	-1	8294400	Record_2018-04-15_07-46-53-S04.csv	24.75359511	24.75	0.233839601	26.22	24	22500	24.67069795	24.65	0.218189634	25.96	24	64260	IMG_8470_S04.JPG_thresh.jpg	67.7	Coastal lowland forest	Forest
277	Plot34	Plot34_S05	S05	Forest	2018_0415_074104_S05_G_CALIBRATED.JPG	0.54257072	0.5	0.314470633	1	-1	3325026	2018_0415_074109_S05_S_CALIBRATED.JPG	0.188448651	0.3	0.35633303	1	-1	8294400	Record_2018-04-15_07-49-21-S05.csv	24.34220622	24.35	0.155139643	25	23.81	22500	24.34389654	24.35	0.216971734	25.29	23.56	68068	IMG_8474_S05.JPG_thresh.jpg	80.5	Coastal lowland forest	Forest
278	Plot34	Plot34_S06	S06	Forest	NA	NA	NA	NA	NA	NA	NA	NA	NA	NA	NA	NA	NA	NA	NA	NA	NA	NA	NA	NA	NA	NA	NA	NA	NA	NA	NA	IMG_8475.JPG_thresh.jpg	83.2	Coastal lowland forest	Forest
279	Plot34	Plot34_S07	S07	Forest	NA	NA	NA	NA	NA	NA	NA	NA	NA	NA	NA	NA	NA	NA	NA	NA	NA	NA	NA	NA	NA	NA	NA	NA	NA	NA	NA	IMG_8476.JPG_thresh.jpg	89	Coastal lowland forest	Forest
280	Plot34	Plot34_S08	S08	Forest	NA	NA	NA	NA	NA	NA	NA	NA	NA	NA	NA	NA	NA	NA	NA	NA	NA	NA	NA	NA	NA	NA	NA	NA	NA	NA	NA	IMG_8477.JPG_thresh.jpg	91.1	Coastal lowland forest	Forest
281	Plot34	Plot34_S09	S09	Forest	NA	NA	NA	NA	NA	NA	NA	NA	NA	NA	NA	NA	NA	NA	NA	NA	NA	NA	NA	NA	NA	NA	NA	NA	NA	NA	NA	IMG_8478.JPG_thresh.jpg	81	Coastal lowland forest	Forest
282	Plot34	Plot34_S10	S10	Forest	NA	NA	NA	NA	NA	NA	NA	NA	NA	NA	NA	NA	NA	NA	NA	NA	NA	NA	NA	NA	NA	NA	NA	NA	NA	NA	NA	IMG_8479.JPG_thresh.jpg	71.2	Coastal lowland forest	Forest
283	Plot34	Plot34_S11	S11	Forest	NA	NA	NA	NA	NA	NA	NA	NA	NA	NA	NA	NA	NA	NA	NA	NA	NA	NA	NA	NA	NA	NA	NA	NA	NA	NA	NA	IMG_8480.JPG_thresh.jpg	90.1	Coastal lowland forest	Forest
284	Plot34	Plot34_S12	S12	Forest	NA	NA	NA	NA	NA	NA	NA	NA	NA	NA	NA	NA	NA	NA	NA	NA	NA	NA	NA	NA	NA	NA	NA	NA	NA	NA	NA	IMG_8481.JPG_thresh.jpg	48.9	Coastal lowland forest	Forest
285	Plot34	Plot34_S13	S13	Forest	NA	NA	NA	NA	NA	NA	NA	NA	NA	NA	NA	NA	NA	NA	NA	NA	NA	NA	NA	NA	NA	NA	NA	NA	NA	NA	NA	IMG_8482.JPG_thresh.jpg	76.9	Coastal lowland forest	Forest
286	Plot35	Plot35_S01	S01	Forest	2018_0415_080558_S01_G_CALIBRATED.JPG	0.021086133	0	0.077344396	1	-1	2371750	2018_0415_080605_S01_S_CALIBRATED.JPG	0.099626213	0	0.428321507	1	-1	8263126	Record_2018-04-15_08-15-57-S01.csv	23.98210444	24	0.223957001	24.62	23.29	22500	24.06706892	24.08	0.23177963	24.86	23.29	56283	IMG_8501_S01.JPG_thresh.jpg	83.1	Coastal lowland forest	Forest
287	Plot35	Plot35_S02	S02	Forest	2018_0415_080345_S02_G_CALIBRATED.JPG	0.048722711	0.066666667	0.104735293	1	-1	3059689	2018_0415_080352_S02_S_CALIBRATED.JPG	-0.074785555	0	0.251542169	1	-1	8272376	Record_2018-04-15_08-14-27-S02.csv	24.28575778	24.24	0.390426013	25.64	23.4	22500	23.98226664	23.94	0.244299157	25.05	23.32	54208	IMG_8498_S02.JPG_thresh.jpg	85	Coastal lowland forest	Forest
288	Plot35	Plot35_S03	S03	Forest	2018_0415_080443_S03_G_CALIBRATED.JPG	0.057247476	0.076923077	0.119557011	1	-1	2518801	2018_0415_080452_S03_S_CALIBRATED.JPG	-0.012144412	0	0.113487782	1	-1	8286347	Record_2018-04-15_08-14-58-S03.csv	23.94898489	23.97	0.236292592	24.59	23.12	22500	23.95679958	23.97	0.242565939	25.69	23.12	59311	IMG_8499_S03.JPG_thresh.jpg	93.8	Coastal lowland forest	Forest
289	Plot35	Plot35_S04	S04	Forest	2018_0415_080529_S04_G_CALIBRATED.JPG	0.050111674	0.066666667	0.107405243	1	-1	2556693	2018_0415_080535_S04_S_CALIBRATED.JPG	-0.136181195	0	0.347467745	1	-1	8260167	Record_2018-04-15_08-15-27-S04.csv	23.68819867	23.67	0.283036079	24.46	22.77	22500	23.81578543	23.81	0.261766178	24.59	22.91	53550	IMG_8500_S04.JPG_thresh.jpg	57	Coastal lowland forest	Forest
290	Plot35	Plot35_S05	S05	Forest	2018_0415_080314_S05_G_CALIBRATED.JPG	0.045987473	0.066666667	0.102255419	1	-1	2747741	2018_0415_080322_S05_S_CALIBRATED.JPG	-0.195440807	-0.111111111	0.361074871	1	-1	8219558	Record_2018-04-15_08-14-07-S05.csv	24.18288356	24.21	0.277320803	24.86	23.4	22500	24.43593243	24.46	0.200012572	25	23.4	44132	IMG_8497_S05.JPG_thresh.jpg	80	Coastal lowland forest	Forest
291	Plot35	Plot35_S06	S06	Forest	NA	NA	NA	NA	NA	NA	NA	NA	NA	NA	NA	NA	NA	NA	NA	NA	NA	NA	NA	NA	NA	NA	NA	NA	NA	NA	NA	IMG_8502.JPG_thresh.jpg	98.2	Coastal lowland forest	Forest
292	Plot35	Plot35_S07	S07	Forest	NA	NA	NA	NA	NA	NA	NA	NA	NA	NA	NA	NA	NA	NA	NA	NA	NA	NA	NA	NA	NA	NA	NA	NA	NA	NA	NA	IMG_8503.JPG_thresh.jpg	91.7	Coastal lowland forest	Forest
293	Plot35	Plot35_S08	S08	Forest	NA	NA	NA	NA	NA	NA	NA	NA	NA	NA	NA	NA	NA	NA	NA	NA	NA	NA	NA	NA	NA	NA	NA	NA	NA	NA	NA	IMG_8504.JPG_thresh.jpg	72.2	Coastal lowland forest	Forest
294	Plot35	Plot35_S09	S09	Forest	NA	NA	NA	NA	NA	NA	NA	NA	NA	NA	NA	NA	NA	NA	NA	NA	NA	NA	NA	NA	NA	NA	NA	NA	NA	NA	NA	IMG_8505.JPG_thresh.jpg	89.9	Coastal lowland forest	Forest
295	Plot35	Plot35_S10	S10	Forest	NA	NA	NA	NA	NA	NA	NA	NA	NA	NA	NA	NA	NA	NA	NA	NA	NA	NA	NA	NA	NA	NA	NA	NA	NA	NA	NA	IMG_8506.JPG_thresh.jpg	90.9	Coastal lowland forest	Forest
296	Plot35	Plot35_S11	S11	Forest	NA	NA	NA	NA	NA	NA	NA	NA	NA	NA	NA	NA	NA	NA	NA	NA	NA	NA	NA	NA	NA	NA	NA	NA	NA	NA	NA	IMG_8507.JPG_thresh.jpg	64.8	Coastal lowland forest	Forest
297	Plot35	Plot35_S12	S12	Forest	NA	NA	NA	NA	NA	NA	NA	NA	NA	NA	NA	NA	NA	NA	NA	NA	NA	NA	NA	NA	NA	NA	NA	NA	NA	NA	NA	IMG_8508.JPG_thresh.jpg	74.8	Coastal lowland forest	Forest
298	Plot35	Plot35_S13	S13	Forest	NA	NA	NA	NA	NA	NA	NA	NA	NA	NA	NA	NA	NA	NA	NA	NA	NA	NA	NA	NA	NA	NA	NA	NA	NA	NA	NA	IMG_8509.JPG_thresh.jpg	81.7	Coastal lowland forest	Forest
299	Plot35	Plot35_S14	S14	Forest	NA	NA	NA	NA	NA	NA	NA	NA	NA	NA	NA	NA	NA	NA	NA	NA	NA	NA	NA	NA	NA	NA	NA	NA	NA	NA	NA	IMG_8510.JPG_thresh.jpg	62.8	Coastal lowland forest	Forest
300	Plot36	Plot36_S01	S01	Edge	2018_0415_082450_S01_G_CALIBRATED.JPG	0.684167298	0.706666667	0.13566774	1	-1	3569940	2018_0415_082455_S01_S_CALIBRATED.JPG	0.098685298	0.098265896	0.041684547	0.290322581	-0.142857143	8294400	NA	NA	NA	NA	NA	NA	NA	NA	NA	NA	NA	NA	NA	IMG_8515_S01.JPG_thresh.jpg	0	Bush at Edge of forest	Edge
301	Plot36	Plot36_S02	S02	Edge	2018_0415_082238_S02_G_CALIBRATED.JPG	0.642275088	0.666666667	0.142119019	1	-1	2436980	2018_0415_082244_S02_S_CALIBRATED.JPG	0.1128958	0.111111111	0.062211638	0.777777778	-0.163265306	8294400	Record_2018-04-15_08-31-18-S02.csv	27.88484222	27.85	0.828690852	30.88	25.93	22500	27.55141715	27.53	0.80259238	30.2	25.13	28275	IMG_8512_S02.JPG_thresh.jpg	0	Bush at Edge of forest	Edge
302	Plot36	Plot36_S03	S03	Edge	2018_0415_082311_S03_G_CALIBRATED.JPG	0.79652679	0.8	0.111265096	1	-1	3718521	2018_0415_082317_S03_S_CALIBRATED.JPG	0.655290949	0.696969697	0.19971742	1	-1	8294400	Record_2018-04-15_08-32-40-S03.csv	24.18524889	24.21	0.252041834	24.89	23.07	22500	24.17062996	24.19	0.209575825	24.78	23.07	33288	IMG_8513_S03.JPG_thresh.jpg	94.5	Bush at Edge of forest	Edge
303	Plot36	Plot36_S04	S04	Edge	2018_0415_082354_S04_G_CALIBRATED.JPG	0.803326621	0.8	0.180878848	1	-1	3450474	2018_0415_082419_S04_S_CALIBRATED.JPG	0.606390683	0.7	0.273620848	1	-1	8294400	Record_2018-04-15_08-33-08-S04.csv	26.78989511	26.72	0.841192739	30.1	25.02	22500	27.33913303	27.32	1.008657031	30.36	25.16	65250	IMG_8514_S04.JPG_thresh.jpg	93.9	Bush at Edge of forest	Edge
304	Plot36	Plot36_S05	S05	Edge	2018_0415_082212_S05_G_CALIBRATED.JPG	0.726266397	0.714285714	0.10958924	1	-1	2716037	2018_0415_082219_S05_S_CALIBRATED.JPG	0.237248511	0.112107623	0.252836682	1	-0.272727273	8294400	Record_2018-04-15_08-30-46-S05.csv	25.28573689	25.29	0.269134259	26.3	24.24	22500	25.34165895	25.34	0.254821998	26.22	24.24	53148	IMG_8511_S05.JPG_thresh.jpg	0	Bush at Edge of forest	Edge
305	Plot36	Plot36_S06	S06	Edge	NA	NA	NA	NA	NA	NA	NA	NA	NA	NA	NA	NA	NA	NA	NA	NA	NA	NA	NA	NA	NA	NA	NA	NA	NA	NA	NA	IMG_8516.JPG_thresh.jpg	0	Bush at Edge of forest	Edge
306	Plot36	Plot36_S07	S07	Edge	NA	NA	NA	NA	NA	NA	NA	NA	NA	NA	NA	NA	NA	NA	NA	NA	NA	NA	NA	NA	NA	NA	NA	NA	NA	NA	NA	IMG_8517.JPG_thresh.jpg	0	Bush at Edge of forest	Edge
307	Plot36	Plot36_S08	S08	Edge	NA	NA	NA	NA	NA	NA	NA	NA	NA	NA	NA	NA	NA	NA	NA	NA	NA	NA	NA	NA	NA	NA	NA	NA	NA	NA	NA	IMG_8518.JPG_thresh.jpg	0	Bush at Edge of forest	Edge
308	Plot36	Plot36_S09	S09	Edge	NA	NA	NA	NA	NA	NA	NA	NA	NA	NA	NA	NA	NA	NA	NA	NA	NA	NA	NA	NA	NA	NA	NA	NA	NA	NA	NA	IMG_8519.JPG_thresh.jpg	0	Bush at Edge of forest	Edge
309	Plot36	Plot36_S10	S10	Edge	NA	NA	NA	NA	NA	NA	NA	NA	NA	NA	NA	NA	NA	NA	NA	NA	NA	NA	NA	NA	NA	NA	NA	NA	NA	NA	NA	IMG_8520.JPG_thresh.jpg	70.2	Bush at Edge of forest	Edge
310	Plot36	Plot36_S11	S11	Edge	NA	NA	NA	NA	NA	NA	NA	NA	NA	NA	NA	NA	NA	NA	NA	NA	NA	NA	NA	NA	NA	NA	NA	NA	NA	NA	NA	IMG_8521.JPG_thresh.jpg	89.6	Bush at Edge of forest	Edge
311	Plot36	Plot36_S12	S12	Edge	NA	NA	NA	NA	NA	NA	NA	NA	NA	NA	NA	NA	NA	NA	NA	NA	NA	NA	NA	NA	NA	NA	NA	NA	NA	NA	NA	IMG_8522.JPG_thresh.jpg	95	Bush at Edge of forest	Edge
312	Plot36	Plot36_S13	S13	Edge	NA	NA	NA	NA	NA	NA	NA	NA	NA	NA	NA	NA	NA	NA	NA	NA	NA	NA	NA	NA	NA	NA	NA	NA	NA	NA	NA	IMG_8523.JPG_thresh.jpg	94.4	Bush at Edge of forest	Edge
313	Plot36	Plot36_S14	S14	Edge	NA	NA	NA	NA	NA	NA	NA	NA	NA	NA	NA	NA	NA	NA	NA	NA	NA	NA	NA	NA	NA	NA	NA	NA	NA	NA	NA	IMG_8524.JPG_thresh.jpg	0	Bush at Edge of forest	Edge
314	Plot36	Plot36_S15	S15	Edge	NA	NA	NA	NA	NA	NA	NA	NA	NA	NA	NA	NA	NA	NA	NA	NA	NA	NA	NA	NA	NA	NA	NA	NA	NA	NA	NA	IMG_8525.JPG_thresh.jpg	0	Bush at Edge of forest	Edge
315	Plot37	Plot37_S01	S01	Bush	2018_0415_085415_S01_G_CALIBRATED.JPG	0.981642232	1	0.082115286	1	-1	3558020	2018_0415_085421_S01_S_CALIBRATED.JPG	0.523986871	0.972222222	0.669759373	1	-1	8294400	Record_2018-04-15_09-00-41-S01.csv	26.182896	26.19	0.303216288	27.38	25.24	22500	26.10264841	26.11	0.300194708	27.27	24.81	56026	IMG_8544_S01.JPG_thresh.jpg	88.7	Single large tree in bush	Bush
316	Plot37	Plot37_S02	S02	Bush	2018_0415_085447_S02_G_CALIBRATED.JPG	0.209334916	-0.141304348	0.582562796	1	-1	3394208	2018_0415_085454_S02_S_CALIBRATED.JPG	0.256292731	-0.24	0.68954209	1	-1	8294400	Record_2018-04-15_09-01-15-S02.csv	29.276348	29.19	0.676528666	31.81	27.66	22500	29.26708987	29.26	0.870579126	32.08	26.64	53946	IMG_8545_S02.JPG_thresh.jpg	66.7	Single large tree in bush	Bush
317	Plot37	Plot37_S03	S03	Bush	2018_0415_085517_S03_G_CALIBRATED.JPG	0.987900108	1	0.054094871	1	-0.629392971	2791096	2018_0415_085522_S03_S_CALIBRATED.JPG	0.610863061	1	0.63171324	1	-1	8294400	Record_2018-04-15_09-01-47-S03.csv	25.38981689	25.4	0.162832642	26.06	24.32	22500	25.47944341	25.48	0.179842981	26.14	24.16	48150	IMG_8546_S03.JPG_thresh.jpg	71.5	Single large tree in bush	Bush
318	Plot37	Plot37_S04	S04	Bush	2018_0415_085546_S04_G_CALIBRATED.JPG	0.984237111	1	0.032124037	1	-0.945205479	2452008	2018_0415_085552_S04_S_CALIBRATED.JPG	0.747212113	1	0.537300865	1	-1	8294400	Record_2018-04-15_09-02-08-S04.csv	25.09979244	25.1	0.207131867	25.74	24.46	22500	25.16501596	25.16	0.229225726	26.11	23.81	50764	IMG_8547_S04.JPG_thresh.jpg	80.9	Single large tree in bush	Bush
319	Plot37	Plot37_S05	S05	Bush	2018_0415_085609_S05_G_CALIBRATED.JPG	0.864736587	1	0.327010287	1	-0.971631206	3398580	2018_0415_085614_S05_S_CALIBRATED.JPG	0.263348086	0.163265306	0.696228408	1	-1	8294400	Record_2018-04-15_09-02-28-S05.csv	26.68744711	26.67	0.269951406	27.82	25.58	22500	26.77944901	26.72	0.380120729	28.72	25.24	59475	IMG_8548_S05.JPG_thresh.jpg	83.7	Single large tree in bush	Bush
320	Plot37	Plot37_S06	S06	Bush	NA	NA	NA	NA	NA	NA	NA	NA	NA	NA	NA	NA	NA	NA	NA	NA	NA	NA	NA	NA	NA	NA	NA	NA	NA	NA	NA	IMG_8549.JPG_thresh.jpg	0	Single large tree in bush	Bush
321	Plot37	Plot37_S07	S07	Bush	NA	NA	NA	NA	NA	NA	NA	NA	NA	NA	NA	NA	NA	NA	NA	NA	NA	NA	NA	NA	NA	NA	NA	NA	NA	NA	NA	IMG_8550.JPG_thresh.jpg	0	Single large tree in bush	Bush
322	Plot37	Plot37_S08	S08	Bush	NA	NA	NA	NA	NA	NA	NA	NA	NA	NA	NA	NA	NA	NA	NA	NA	NA	NA	NA	NA	NA	NA	NA	NA	NA	NA	NA	IMG_8551.JPG_thresh.jpg	0	Single large tree in bush	Bush
323	Plot37	Plot37_S09	S09	Bush	NA	NA	NA	NA	NA	NA	NA	NA	NA	NA	NA	NA	NA	NA	NA	NA	NA	NA	NA	NA	NA	NA	NA	NA	NA	NA	NA	IMG_8552.JPG_thresh.jpg	8.9	Single large tree in bush	Bush
324	Plot37	Plot37_S10	S10	Bush	NA	NA	NA	NA	NA	NA	NA	NA	NA	NA	NA	NA	NA	NA	NA	NA	NA	NA	NA	NA	NA	NA	NA	NA	NA	NA	NA	IMG_8553.JPG_thresh.jpg	78	Single large tree in bush	Bush
325	Plot37	Plot37_S11	S11	Bush	NA	NA	NA	NA	NA	NA	NA	NA	NA	NA	NA	NA	NA	NA	NA	NA	NA	NA	NA	NA	NA	NA	NA	NA	NA	NA	NA	IMG_8554.JPG_thresh.jpg	85.1	Single large tree in bush	Bush
326	Plot37	Plot37_S12	S12	Bush	NA	NA	NA	NA	NA	NA	NA	NA	NA	NA	NA	NA	NA	NA	NA	NA	NA	NA	NA	NA	NA	NA	NA	NA	NA	NA	NA	IMG_8555.JPG_thresh.jpg	92.5	Single large tree in bush	Bush
327	Plot37	Plot37_S13	S13	Bush	NA	NA	NA	NA	NA	NA	NA	NA	NA	NA	NA	NA	NA	NA	NA	NA	NA	NA	NA	NA	NA	NA	NA	NA	NA	NA	NA	IMG_8556.JPG_thresh.jpg	86.4	Single large tree in bush	Bush
328	Plot37	Plot37_S14	S14	Bush	NA	NA	NA	NA	NA	NA	NA	NA	NA	NA	NA	NA	NA	NA	NA	NA	NA	NA	NA	NA	NA	NA	NA	NA	NA	NA	NA	IMG_8557.JPG_thresh.jpg	88.5	Single large tree in bush	Bush
329	Plot37	Plot37_S15	S15	Bush	NA	NA	NA	NA	NA	NA	NA	NA	NA	NA	NA	NA	NA	NA	NA	NA	NA	NA	NA	NA	NA	NA	NA	NA	NA	NA	NA	IMG_8558.JPG_thresh.jpg	31.7	Single large tree in bush	Bush
330	Plot4	Plot4_S01	S01	Edge	2018_0411_114008_S01_G_CALIBRATED.JPG	0.531457257	0.55	0.139312253	1	-1	3634521	2018_0411_114018_S01_S_CALIBRATED.JPG	0.084996728	0.04950495	0.141068398	0.70212766	-1	8294400	Record_2018-04-11_11-51-S01.csv	25.17261156	25.1	0.755118232	27.11	23.18	22500	25.25499033	25.18	0.797378511	27.4	22.77	48618	IMG_8074_S01.JPG_thresh.jpg	0	Coastal lowland forest edge	Edge
331	Plot4	Plot4_S02	S02	Edge	2018_0411_114131_S02_G_CALIBRATED.JPG	0.51564955	0.538461538	0.144510966	1	-1	2904820	2018_0411_114141_S02_S_CALIBRATED.JPG	0.017904953	0.009345794	0.090423284	0.784615385	-0.281553398	8294400	Record_2018-04-11_11-52-S02.csv	21.82784844	21.8	0.232440919	22.8	21.05	22500	21.93262856	21.91	0.314897967	23.64	20.85	57054	IMG_8075_S02.JPG_thresh.jpg	0	Coastal lowland forest edge	Edge
332	Plot4	Plot4_S03	S03	Edge	2018_0411_114246_S03_G_CALIBRATED.JPG	0.751482876	0.792207792	0.179598602	1	-1	2490030	2018_0411_114254_S03_S_CALIBRATED.JPG	0.297958686	0.344827586	0.274168684	1	-1	8294400	Record_2018-04-11_11-53-S03.csv	22.22345067	22.19	0.251510013	23.4	21.41	22500	22.15115141	22.13	0.240972831	23.4	21.41	53760	IMG_8076_S03.JPG_thresh.jpg	86.7	Coastal lowland forest edge	Edge
333	Plot4	Plot4_S04	S04	Edge	2018_0411_114420_S04_G_CALIBRATED.JPG	0.702107381	0.7	0.153058269	1	-1	2684526	2018_0411_114428_S04_S_CALIBRATED.JPG	0.330776149	0.442622951	0.319005448	1	-0.5	8294400	Record_2018-04-11_11-54-S04.csv	23.99468622	23.97	0.500554929	26.11	22.63	22500	23.67963278	23.62	0.451266657	26.01	22.55	31752	IMG_8073_S04.JPG_thresh.jpg	69.4	Coastal lowland forest edge	Edge
334	Plot4	Plot4_S05	S05	Edge	2018_0411_113858_S05_G_CALIBRATED.JPG	0.691334717	0.702702703	0.103676426	1	-1	2576820	2018_0411_113923_S05_S_CALIBRATED.JPG	0.111868462	0.012658228	0.219685939	0.961538462	-0.512820513	8294400	Record_2018-04-11_11-51-S05.csv	25.86131289	25.82	0.726943821	28.6	23.89	22500	26.13187824	26.11	0.754049537	30.53	23.89	61712	IMG_8077_S05.JPG_thresh.jpg	49.2	Coastal lowland forest edge	Edge
335	Plot4	Plot4_S06	S06	Edge	NA	NA	NA	NA	NA	NA	NA	NA	NA	NA	NA	NA	NA	NA	NA	NA	NA	NA	NA	NA	NA	NA	NA	NA	NA	NA	NA	IMG_8078_06.JPG_thresh.jpg	0	Coastal lowland forest edge	Edge
336	Plot4	Plot4_S07	S07	Edge	NA	NA	NA	NA	NA	NA	NA	NA	NA	NA	NA	NA	NA	NA	NA	NA	NA	NA	NA	NA	NA	NA	NA	NA	NA	NA	NA	IMG_8079.JPG_thresh.jpg	0	Coastal lowland forest edge	Edge
337	Plot4	Plot4_S08	S08	Edge	NA	NA	NA	NA	NA	NA	NA	NA	NA	NA	NA	NA	NA	NA	NA	NA	NA	NA	NA	NA	NA	NA	NA	NA	NA	NA	NA	IMG_8080.JPG_thresh.jpg	0	Coastal lowland forest edge	Edge
338	Plot4	Plot4_S09	S09	Edge	NA	NA	NA	NA	NA	NA	NA	NA	NA	NA	NA	NA	NA	NA	NA	NA	NA	NA	NA	NA	NA	NA	NA	NA	NA	NA	NA	IMG_8081.JPG_thresh.jpg	0	Coastal lowland forest edge	Edge
339	Plot4	Plot4_S10	S10	Edge	NA	NA	NA	NA	NA	NA	NA	NA	NA	NA	NA	NA	NA	NA	NA	NA	NA	NA	NA	NA	NA	NA	NA	NA	NA	NA	NA	IMG_8082.JPG_thresh.jpg	0	Coastal lowland forest edge	Edge
340	Plot4	Plot4_S11	S11	Edge	NA	NA	NA	NA	NA	NA	NA	NA	NA	NA	NA	NA	NA	NA	NA	NA	NA	NA	NA	NA	NA	NA	NA	NA	NA	NA	NA	IMG_8083.JPG_thresh.jpg	0.6	Coastal lowland forest edge	Edge
341	Plot4	Plot4_S12	S12	Edge	NA	NA	NA	NA	NA	NA	NA	NA	NA	NA	NA	NA	NA	NA	NA	NA	NA	NA	NA	NA	NA	NA	NA	NA	NA	NA	NA	IMG_8084.JPG_thresh.jpg	53	Coastal lowland forest edge	Edge
342	Plot7	Plot7_S01	S01	Edge	2018_0411_140117_S01_G_CALIBRATED.JPG	0.043742226	0	0.204969294	1	-0.333333333	2254944	2018_0411_140128_S01_S_CALIBRATED.JPG	0.176530966	0	0.453643196	1	-1	8271189	Record_2018-04-11_14-12-S01.csv	21.90029956	21.94	0.267658574	22.71	20.93	22500	21.78206181	21.8	0.281079621	22.71	20.99	38214	IMG_8099_S01.JPG_thresh.jpg	86.6	Coastal lowland forest edge	Edge
343	Plot7	Plot7_S02	S02	Edge	NA	NA	NA	NA	NA	NA	NA	2018_0411_140234_S02_S_CALIBRATED.JPG	0.203906116	0	0.427968087	1	-1	8251101	Record_2018-04-11_14-13-S02.csv	22.09226133	22.05	0.321143919	23.32	21.13	22500	21.84184328	21.83	0.383339269	23.26	20.96	41106	IMG_8100_S02.JPG_thresh.jpg	97.1	Coastal lowland forest edge	Edge
344	Plot7	Plot7_S03	S03	Edge	2018_0411_140300_S03_G_CALIBRATED.JPG	0.040992975	0	0.198712094	1	-0.333333333	3638656	2018_0411_140311_S03_S_CALIBRATED.JPG	0.078785399	0.142857143	0.426176139	1	-1	8278763	Record_2018-04-11_14-14-S03.csv	21.12004489	21.1	0.211122463	22.11	19.11	22500	21.42769829	21.41	0.340508863	23.07	20.45	59295	IMG_8101_S03.JPG_thresh.jpg	61.2	Coastal lowland forest edge	Edge
345	Plot7	Plot7_S04	S04	Edge	2018_0411_140352_S04_G_CALIBRATED.JPG	0.031779314	0	0.168921007	1	-1	2751772	2018_0411_140400_S04_S_CALIBRATED.JPG	-0.117003658	0.043478261	0.43394193	1	-1	8293951	Record_2018-04-11_14-15-S04.csv	21.10343822	21.07	0.228804562	22.13	20.45	22500	21.02532189	21.02	0.189098017	21.86	20.43	11650	IMG_8102_S04.JPG_thresh.jpg	94.9	Coastal lowland forest edge	Edge
346	Plot7	Plot7_S05	S05	Edge	2018_0411_140426_S05_G_CALIBRATED.JPG	0.011855632	0	0.108404145	1	-1	2599679	2018_0411_140434_S05_S_CALIBRATED.JPG	0.096086208	0.142857143	0.376869693	1	-1	8292912	Record_2018-04-11_14-16-S05.csv	21.58617289	21.58	0.335413605	22.74	20.57	22500	21.75307942	21.74	0.330647364	22.74	20.85	32308	IMG_8103_S05.JPG_thresh.jpg	78.6	Coastal lowland forest edge	Edge
347	Plot7	Plot7_S06	S06	Edge	NA	NA	NA	NA	NA	NA	NA	NA	NA	NA	NA	NA	NA	NA	NA	NA	NA	NA	NA	NA	NA	NA	NA	NA	NA	NA	NA	IMG_8104.JPG_thresh.jpg	0	Coastal lowland forest edge	Edge
348	Plot7	Plot7_S07	S07	Edge	NA	NA	NA	NA	NA	NA	NA	NA	NA	NA	NA	NA	NA	NA	NA	NA	NA	NA	NA	NA	NA	NA	NA	NA	NA	NA	NA	IMG_8105.JPG_thresh.jpg	0	Coastal lowland forest edge	Edge
349	Plot7	Plot7_S08	S08	Edge	NA	NA	NA	NA	NA	NA	NA	NA	NA	NA	NA	NA	NA	NA	NA	NA	NA	NA	NA	NA	NA	NA	NA	NA	NA	NA	NA	IMG_8106.JPG_thresh.jpg	0	Coastal lowland forest edge	Edge
350	Plot7	Plot7_S09	S09	Edge	NA	NA	NA	NA	NA	NA	NA	NA	NA	NA	NA	NA	NA	NA	NA	NA	NA	NA	NA	NA	NA	NA	NA	NA	NA	NA	NA	IMG_8107.JPG_thresh.jpg	98.4	Coastal lowland forest edge	Edge
351	Plot7	Plot7_S10	S10	Edge	NA	NA	NA	NA	NA	NA	NA	NA	NA	NA	NA	NA	NA	NA	NA	NA	NA	NA	NA	NA	NA	NA	NA	NA	NA	NA	NA	IMG_8108.JPG_thresh.jpg	91.2	Coastal lowland forest edge	Edge
352	Plot7	Plot7_S11	S11	Edge	NA	NA	NA	NA	NA	NA	NA	NA	NA	NA	NA	NA	NA	NA	NA	NA	NA	NA	NA	NA	NA	NA	NA	NA	NA	NA	NA	IMG_8109.JPG_thresh.jpg	98.2	Coastal lowland forest edge	Edge
353	Plot11	Plot11_S01	S01	Plantation	NA	NA	NA	NA	NA	NA	NA	2018_0412_085511_S01_S_CALIBRATED.JPG	-0.073548779	-0.090909091	0.39004653	1	-1	8285589	Record_2018-04-12_09-02-S01.csv	21.58723511	21.74	0.563745597	23.48	20.09	22500	21.65159789	21.83	0.542715215	23.67	20.09	96033	IMG_8159_S01.JPG_thresh.jpg	83.4	Eucalyptus plantation	Plantation
354	Plot11	Plot11_S02	S02	Plantation	NA	NA	NA	NA	NA	NA	NA	2018_0412_085534_S02_S_CALIBRATED.JPG	-0.000765476	0	0.404150971	1	-1	8274986	Record_2018-04-12_09-03-S02.csv	21.13310578	21.13	0.532667697	22.41	20	22500	21.41475553	21.55	0.51552392	22.49	20	95310	IMG_8160_S02.JPG_thresh.jpg	76.9	Eucalyptus plantation	Plantation
355	Plot11	Plot11_S03	S03	Plantation	NA	NA	NA	NA	NA	NA	NA	2018_0412_085333_S03_S_CALIBRATED.JPG	-0.013373075	0	0.375111792	1	-1	8283461	Record_2018-04-12_09-02-S03.csv	22.05131956	22.08	0.289123158	23.18	21.05	22500	22.20496365	22.19	0.294990289	23.37	21.1	72900	IMG_8157_S03.JPG_thresh.jpg	73.4	Eucalyptus plantation	Plantation
356	Plot11	Plot11_S04	S04	Plantation	NA	NA	NA	NA	NA	NA	NA	2018_0412_085403_S04_S_CALIBRATED.JPG	-0.025007221	0	0.387711741	1	-1	8280442	Record_2018-04-12_09-02-S04.csv	21.74068356	21.74	0.212136255	22.44	20.88	22500	22.00170677	22.02	0.289826496	22.93	20.88	74732	IMG_8158_S04.JPG_thresh.jpg	82.6	Eucalyptus plantation	Plantation
357	Plot11	Plot11_S05	S05	Plantation	NA	NA	NA	NA	NA	NA	NA	2018_0412_085258_S05_S_CALIBRATED.JPG	-0.04264087	0	0.384220683	1	-1	8284390	Record_2018-04-12_09-01-S05.csv	21.99783067	21.97	0.175161829	22.71	21.47	22500	21.98818111	21.97	0.184951401	22.71	21.33	70180	IMG_8156_S05.JPG_thresh.jpg	50.8	Eucalyptus plantation	Plantation
358	Plot11	Plot11_S06	S06	Plantation	NA	NA	NA	NA	NA	NA	NA	NA	NA	NA	NA	NA	NA	NA	NA	NA	NA	NA	NA	NA	NA	NA	NA	NA	NA	NA	NA	IMG_8161.JPG_thresh.jpg	86.3	Eucalyptus plantation	Plantation
359	Plot11	Plot11_S07	S07	Plantation	NA	NA	NA	NA	NA	NA	NA	NA	NA	NA	NA	NA	NA	NA	NA	NA	NA	NA	NA	NA	NA	NA	NA	NA	NA	NA	NA	IMG_8162.JPG_thresh.jpg	73	Eucalyptus plantation	Plantation
360	Plot11	Plot11_S08	S08	Plantation	NA	NA	NA	NA	NA	NA	NA	NA	NA	NA	NA	NA	NA	NA	NA	NA	NA	NA	NA	NA	NA	NA	NA	NA	NA	NA	NA	IMG_8163.JPG_thresh.jpg	61.9	Eucalyptus plantation	Plantation
361	Plot11	Plot11_S09	S09	Plantation	NA	NA	NA	NA	NA	NA	NA	NA	NA	NA	NA	NA	NA	NA	NA	NA	NA	NA	NA	NA	NA	NA	NA	NA	NA	NA	NA	IMG_8164.JPG_thresh.jpg	74.1	Eucalyptus plantation	Plantation
362	Plot11	Plot11_S10	S10	Plantation	NA	NA	NA	NA	NA	NA	NA	NA	NA	NA	NA	NA	NA	NA	NA	NA	NA	NA	NA	NA	NA	NA	NA	NA	NA	NA	NA	IMG_8165.JPG_thresh.jpg	89.9	Eucalyptus plantation	Plantation
363	Plot11	Plot11_S11	S11	Plantation	NA	NA	NA	NA	NA	NA	NA	NA	NA	NA	NA	NA	NA	NA	NA	NA	NA	NA	NA	NA	NA	NA	NA	NA	NA	NA	NA	IMG_8166.JPG_thresh.jpg	83.6	Eucalyptus plantation	Plantation
364	Plot11	Plot11_S12	S12	Plantation	NA	NA	NA	NA	NA	NA	NA	NA	NA	NA	NA	NA	NA	NA	NA	NA	NA	NA	NA	NA	NA	NA	NA	NA	NA	NA	NA	IMG_8167.JPG_thresh.jpg	71.5	Eucalyptus plantation	Plantation
365	Plot11	Plot11_S13	S13	Plantation	NA	NA	NA	NA	NA	NA	NA	NA	NA	NA	NA	NA	NA	NA	NA	NA	NA	NA	NA	NA	NA	NA	NA	NA	NA	NA	NA	IMG_8168.JPG_thresh.jpg	61.2	Eucalyptus plantation	Plantation
366	Plot11	Plot11_S14	S14	Plantation	NA	NA	NA	NA	NA	NA	NA	NA	NA	NA	NA	NA	NA	NA	NA	NA	NA	NA	NA	NA	NA	NA	NA	NA	NA	NA	NA	IMG_8169.JPG_thresh.jpg	95.2	Eucalyptus plantation	Plantation
367	Plot12	Plot12_S01	S01	Forest	NA	NA	NA	NA	NA	NA	NA	2018_0412_094459_S01_S_CALIBRATED.JPG	0.315041899	0.333333333	0.42798489	1	-1	8282808	Record_2018-04-12_09-52-S01.csv	21.77921244	21.77	0.148772784	22.41	21.3	22500	21.85706735	21.86	0.173702655	22.55	21.3	45580	IMG_8174_S01.JPG_thresh.jpg	78.1	Coastal lowland forest	Forest
368	Plot12	Plot12_S02	S02	Forest	NA	NA	NA	NA	NA	NA	NA	2018_0412_094512_S02_S_CALIBRATED.JPG	0.277935051	0.142857143	0.43558399	1	-1	8279929	Record_2018-04-12_09-52-S02.csv	21.73623244	21.74	0.134629112	22.24	21.24	22500	21.71437214	21.69	0.176874773	22.41	21.19	43537	IMG_8175_S02.JPG_thresh.jpg	66.6	Coastal lowland forest	Forest
369	Plot12	Plot12_S03	S03	Forest	NA	NA	NA	NA	NA	NA	NA	2018_0412_094420_S03_S_CALIBRATED.JPG	0.217782023	0	0.434877935	1	-1	8274660	Record_2018-04-12_09-51-S03.csv	21.89787244	21.91	0.122434172	22.46	21.33	22500	21.95232305	21.94	0.163815288	22.66	21.33	48178	IMG_8172_S03.JPG_thresh.jpg	96.1	Coastal lowland forest	Forest
370	Plot12	Plot12_S04	S04	Forest	NA	NA	NA	NA	NA	NA	NA	2018_0412_094434_S04_S_CALIBRATED.JPG	0.220567997	0	0.442783403	1	-1	8275754	Record_2018-04-12_09-51-S04.csv	22.12635378	22.13	0.132880719	22.6	21.6	22500	22.15159596	22.13	0.176657369	22.82	21.58	51480	IMG_8173_S04.JPG_thresh.jpg	84.6	Coastal lowland forest	Forest
371	Plot12	Plot12_S05	S05	Forest	NA	NA	NA	NA	NA	NA	NA	2018_0412_094409_S05_S_CALIBRATED.JPG	0.302898465	0.272727273	0.456236921	1	-1	8277069	Record_2018-04-12_09-50-S05.csv	22.09017867	22.11	0.140284689	22.6	21.52	22500	22.14548608	22.13	0.171713763	22.82	21.52	39201	IMG_8171_S05.JPG_thresh.jpg	81.6	Coastal lowland forest	Forest
372	Plot12	Plot12_S06	S06	Forest	NA	NA	NA	NA	NA	NA	NA	NA	NA	NA	NA	NA	NA	NA	NA	NA	NA	NA	NA	NA	NA	NA	NA	NA	NA	NA	NA	IMG_8176.JPG_thresh.jpg	84.3	Coastal lowland forest	Forest
373	Plot12	Plot12_S07	S07	Forest	NA	NA	NA	NA	NA	NA	NA	NA	NA	NA	NA	NA	NA	NA	NA	NA	NA	NA	NA	NA	NA	NA	NA	NA	NA	NA	NA	IMG_8177.JPG_thresh.jpg	95.7	Coastal lowland forest	Forest
374	Plot12	Plot12_S08	S08	Forest	NA	NA	NA	NA	NA	NA	NA	NA	NA	NA	NA	NA	NA	NA	NA	NA	NA	NA	NA	NA	NA	NA	NA	NA	NA	NA	NA	IMG_8178.JPG_thresh.jpg	92.5	Coastal lowland forest	Forest
375	Plot12	Plot12_S09	S09	Forest	NA	NA	NA	NA	NA	NA	NA	NA	NA	NA	NA	NA	NA	NA	NA	NA	NA	NA	NA	NA	NA	NA	NA	NA	NA	NA	NA	IMG_8179.JPG_thresh.jpg	90.2	Coastal lowland forest	Forest
376	Plot12	Plot12_S10	S10	Forest	NA	NA	NA	NA	NA	NA	NA	NA	NA	NA	NA	NA	NA	NA	NA	NA	NA	NA	NA	NA	NA	NA	NA	NA	NA	NA	NA	IMG_8180.JPG_thresh.jpg	88.5	Coastal lowland forest	Forest
377	Plot12	Plot12_S11	S11	Forest	NA	NA	NA	NA	NA	NA	NA	NA	NA	NA	NA	NA	NA	NA	NA	NA	NA	NA	NA	NA	NA	NA	NA	NA	NA	NA	NA	IMG_8181.JPG_thresh.jpg	96.5	Coastal lowland forest	Forest
378	Plot12	Plot12_S12	S12	Forest	NA	NA	NA	NA	NA	NA	NA	NA	NA	NA	NA	NA	NA	NA	NA	NA	NA	NA	NA	NA	NA	NA	NA	NA	NA	NA	NA	IMG_8182.JPG_thresh.jpg	93.3	Coastal lowland forest	Forest
379	Plot12	Plot12_S13	S13	Forest	NA	NA	NA	NA	NA	NA	NA	NA	NA	NA	NA	NA	NA	NA	NA	NA	NA	NA	NA	NA	NA	NA	NA	NA	NA	NA	NA	IMG_8183.JPG_thresh.jpg	82.5	Coastal lowland forest	Forest
380	Plot12	Plot12_S14	S14	Forest	NA	NA	NA	NA	NA	NA	NA	NA	NA	NA	NA	NA	NA	NA	NA	NA	NA	NA	NA	NA	NA	NA	NA	NA	NA	NA	NA	IMG_8184.JPG_thresh.jpg	92.3	Coastal lowland forest	Forest
381	Plot12	Plot12_S15	S15	Forest	NA	NA	NA	NA	NA	NA	NA	NA	NA	NA	NA	NA	NA	NA	NA	NA	NA	NA	NA	NA	NA	NA	NA	NA	NA	NA	NA	IMG_8185.JPG_thresh.jpg	64.8	Coastal lowland forest	Forest
382	Plot12	Plot12_S16	S16	Forest	NA	NA	NA	NA	NA	NA	NA	NA	NA	NA	NA	NA	NA	NA	NA	NA	NA	NA	NA	NA	NA	NA	NA	NA	NA	NA	NA	IMG_8186.JPG_thresh.jpg	94.1	Coastal lowland forest	Forest
383	Plot15	Plot15_S01	S01	Forest	NA	NA	NA	NA	NA	NA	NA	2018_0412_114625_S01_S_CALIBRATED.JPG	0.222289401	0.142857143	0.359691211	1	-1	8258524	Record_2018-04-12_11-55-S01.csv	22.31340711	22.3	0.175418228	22.91	21.72	22500	22.39490386	22.38	0.20908939	23.51	21.72	56376	IMG_8223_S01.JPG_thresh.jpg	89.3	Coastal lowland forest swamp forest mix	Forest
384	Plot15	Plot15_S02	S02	Forest	NA	NA	NA	NA	NA	NA	NA	2018_0412_114707_S02_S_CALIBRATED.JPG	0.058893878	0	0.246935416	1	-1	8258172	Record_2018-04-12_11-56-S02.csv	22.19709511	22.22	0.218446216	22.88	21.52	22500	22.21737747	22.22	0.224401217	23.04	21.52	56232	IMG_8224_S02.JPG_thresh.jpg	99.5	Coastal lowland forest swamp forest mix	Forest
385	Plot15	Plot15_S03	S03	Forest	NA	NA	NA	NA	NA	NA	NA	2018_0412_114741_S03_S_CALIBRATED.JPG	0.174093159	0	0.418784557	1	-1	8270793	Record_2018-04-12_11-56-S03.csv	22.03224089	22.05	0.200384427	22.63	21.13	22500	22.01523671	22.02	0.208132492	23.02	21.13	61065	IMG_8225_S03.JPG_thresh.jpg	81.9	Coastal lowland forest swamp forest mix	Forest
386	Plot15	Plot15_S04	S04	Forest	NA	NA	NA	NA	NA	NA	NA	2018_0412_114815_S04_S_CALIBRATED.JPG	0.265427635	0.090909091	0.460843975	1	-1	8276239	Record_2018-04-12_11-57-S04.csv	21.505596	21.49	0.183142962	22.16	20.65	22500	21.59621111	21.6	0.207085794	22.55	20.65	56700	IMG_8226_S04.JPG_thresh.jpg	58.6	Coastal lowland forest swamp forest mix	Forest
387	Plot15	Plot15_S05	S05	Forest	NA	NA	NA	NA	NA	NA	NA	2018_0412_114520_S05_S_CALIBRATED.JPG	0.118304948	0	0.308771638	1	-1	8249614	Record_2018-04-12_11-55-S05.csv	22.37119556	22.38	0.194044175	22.96	21.74	22500	22.31726501	22.33	0.246631039	23.21	21.49	66066	IMG_8222_S05.JPG_thresh.jpg	97.8	Coastal lowland forest swamp forest mix	Forest
388	Plot15	Plot15_S06	S06	Forest	NA	NA	NA	NA	NA	NA	NA	NA	NA	NA	NA	NA	NA	NA	NA	NA	NA	NA	NA	NA	NA	NA	NA	NA	NA	NA	NA	IMG_8227.JPG_thresh.jpg	77.5	Coastal lowland forest swamp forest mix	Forest
389	Plot15	Plot15_S07	S07	Forest	NA	NA	NA	NA	NA	NA	NA	NA	NA	NA	NA	NA	NA	NA	NA	NA	NA	NA	NA	NA	NA	NA	NA	NA	NA	NA	NA	IMG_8228.JPG_thresh.jpg	70	Coastal lowland forest swamp forest mix	Forest
390	Plot15	Plot15_S08	S08	Forest	NA	NA	NA	NA	NA	NA	NA	NA	NA	NA	NA	NA	NA	NA	NA	NA	NA	NA	NA	NA	NA	NA	NA	NA	NA	NA	NA	IMG_8229.JPG_thresh.jpg	93.5	Coastal lowland forest swamp forest mix	Forest
391	Plot15	Plot15_S09	S09	Forest	NA	NA	NA	NA	NA	NA	NA	NA	NA	NA	NA	NA	NA	NA	NA	NA	NA	NA	NA	NA	NA	NA	NA	NA	NA	NA	NA	IMG_8230.JPG_thresh.jpg	65.3	Coastal lowland forest swamp forest mix	Forest
392	Plot15	Plot15_S10	S10	Forest	NA	NA	NA	NA	NA	NA	NA	NA	NA	NA	NA	NA	NA	NA	NA	NA	NA	NA	NA	NA	NA	NA	NA	NA	NA	NA	NA	IMG_8231.JPG_thresh.jpg	55.5	Coastal lowland forest swamp forest mix	Forest
393	Plot15	Plot15_S11	S11	Forest	NA	NA	NA	NA	NA	NA	NA	NA	NA	NA	NA	NA	NA	NA	NA	NA	NA	NA	NA	NA	NA	NA	NA	NA	NA	NA	NA	IMG_8232.JPG_thresh.jpg	99.3	Coastal lowland forest swamp forest mix	Forest
394	Plot15	Plot15_S12	S12	Forest	NA	NA	NA	NA	NA	NA	NA	NA	NA	NA	NA	NA	NA	NA	NA	NA	NA	NA	NA	NA	NA	NA	NA	NA	NA	NA	NA	IMG_8233.JPG_thresh.jpg	86.6	Coastal lowland forest swamp forest mix	Forest
395	Plot15	Plot15_S13	S13	Forest	NA	NA	NA	NA	NA	NA	NA	NA	NA	NA	NA	NA	NA	NA	NA	NA	NA	NA	NA	NA	NA	NA	NA	NA	NA	NA	NA	IMG_8234.JPG_thresh.jpg	86.6	Coastal lowland forest swamp forest mix	Forest
396	Plot21	Plot21_S01	S01	Forest	NA	NA	NA	NA	NA	NA	NA	2018_0413_071243_S01_S_CALIBRATED.JPG	-0.416585877	-0.333333333	0.422931677	1	-1	8243382	Record_2018-04-13_07-22-S01.csv	19.69432622	19.69	0.181472326	20.34	18.91	22500	19.62507967	19.63	0.256737096	20.51	18.77	52779	IMG_8315_S01.JPG_thresh.jpg	73.4	Scarp forest	Forest
397	Plot21	Plot21_S02	S02	Forest	NA	NA	NA	NA	NA	NA	NA	2018_0413_071336_S02_S_CALIBRATED.JPG	-0.209108798	0	0.620487942	1	-1	8231687	Record_2018-04-13_07-23-S02.csv	19.30752044	19.32	0.174563333	20.17	18.68	22500	19.45014365	19.43	0.245544241	20.62	18.42	55552	IMG_8316_S02.JPG_thresh.jpg	81.9	Scarp forest	Forest
398	Plot21	Plot21_S03	S03	Forest	NA	NA	NA	NA	NA	NA	NA	2018_0413_071410_S03_S_CALIBRATED.JPG	-0.140697979	0	0.625862689	1	-1	8238162	Record_2018-04-13_07-23-S03.csv	19.89820889	19.94	0.281278568	20.62	18.71	22500	19.96373079	20.03	0.286740317	20.71	18.91	51067	IMG_8317_S03.JPG_thresh.jpg	80.2	Scarp forest	Forest
399	Plot21	Plot21_S04	S04	Forest	NA	NA	NA	NA	NA	NA	NA	2018_0413_071441_S04_S_CALIBRATED.JPG	-0.337669914	0	0.472548305	1	-1	8281185	Record_2018-04-13_07-24-S04.csv	19.18875111	19.2	0.169830968	19.86	18.51	22500	19.26034796	19.26	0.213882102	20.62	18.45	51903	IMG_8318_S04.JPG_thresh.jpg	95.9	Scarp forest	Forest
400	Plot21	Plot21_S05	S05	Forest	NA	NA	NA	NA	NA	NA	NA	2018_0413_071209_S05_S_CALIBRATED.JPG	-0.365314584	-0.333333333	0.44995472	1	-1	8260597	Record_2018-04-13_07-21-S05.csv	19.48128533	19.49	0.163680613	20.09	18.71	22500	19.466276	19.46	0.23929521	20.37	18.48	61152	IMG_8314_S05.JPG_thresh.jpg	75.5	Scarp forest	Forest
401	Plot21	Plot21_S06	S06	Forest	NA	NA	NA	NA	NA	NA	NA	NA	NA	NA	NA	NA	NA	NA	NA	NA	NA	NA	NA	NA	NA	NA	NA	NA	NA	NA	NA	IMG_8319.JPG_thresh.jpg	88	Scarp forest	Forest
402	Plot21	Plot21_S07	S07	Forest	NA	NA	NA	NA	NA	NA	NA	NA	NA	NA	NA	NA	NA	NA	NA	NA	NA	NA	NA	NA	NA	NA	NA	NA	NA	NA	NA	IMG_8320.JPG_thresh.jpg	96.8	Scarp forest	Forest
403	Plot21	Plot21_S08	S08	Forest	NA	NA	NA	NA	NA	NA	NA	NA	NA	NA	NA	NA	NA	NA	NA	NA	NA	NA	NA	NA	NA	NA	NA	NA	NA	NA	NA	IMG_8321.JPG_thresh.jpg	73.9	Scarp forest	Forest
404	Plot21	Plot21_S09	S09	Forest	NA	NA	NA	NA	NA	NA	NA	NA	NA	NA	NA	NA	NA	NA	NA	NA	NA	NA	NA	NA	NA	NA	NA	NA	NA	NA	NA	IMG_8322.JPG_thresh.jpg	78.5	Scarp forest	Forest
405	Plot21	Plot21_S10	S10	Forest	NA	NA	NA	NA	NA	NA	NA	NA	NA	NA	NA	NA	NA	NA	NA	NA	NA	NA	NA	NA	NA	NA	NA	NA	NA	NA	NA	IMG_8323.JPG_thresh.jpg	99.3	Scarp forest	Forest
406	Plot21	Plot21_S11	S11	Forest	NA	NA	NA	NA	NA	NA	NA	NA	NA	NA	NA	NA	NA	NA	NA	NA	NA	NA	NA	NA	NA	NA	NA	NA	NA	NA	NA	IMG_8324.JPG_thresh.jpg	53.8	Scarp forest	Forest
407	Plot21	Plot21_S12	S12	Forest	NA	NA	NA	NA	NA	NA	NA	NA	NA	NA	NA	NA	NA	NA	NA	NA	NA	NA	NA	NA	NA	NA	NA	NA	NA	NA	NA	IMG_8325.JPG_thresh.jpg	88.1	Scarp forest	Forest
408	Plot21	Plot21_S13	S13	Forest	NA	NA	NA	NA	NA	NA	NA	NA	NA	NA	NA	NA	NA	NA	NA	NA	NA	NA	NA	NA	NA	NA	NA	NA	NA	NA	NA	IMG_8326.JPG_thresh.jpg	74.9	Scarp forest	Forest
409	Plot21	Plot21_S14	S14	Forest	NA	NA	NA	NA	NA	NA	NA	NA	NA	NA	NA	NA	NA	NA	NA	NA	NA	NA	NA	NA	NA	NA	NA	NA	NA	NA	NA	IMG_8327.JPG_thresh.jpg	87.7	Scarp forest	Forest
410	Plot21	Plot21_S15	S15	Forest	NA	NA	NA	NA	NA	NA	NA	NA	NA	NA	NA	NA	NA	NA	NA	NA	NA	NA	NA	NA	NA	NA	NA	NA	NA	NA	NA	IMG_8328.JPG_thresh.jpg	95	Scarp forest	Forest
411	Plot21	Plot21_S16	S16	Forest	NA	NA	NA	NA	NA	NA	NA	NA	NA	NA	NA	NA	NA	NA	NA	NA	NA	NA	NA	NA	NA	NA	NA	NA	NA	NA	NA	IMG_8329.JPG_thresh.jpg	50.9	Scarp forest	Forest
412	Plot6	Plot6_S01	S01	Forest	NA	NA	NA	NA	NA	NA	NA	2018_0411_132839_S01_S_CALIBRATED.JPG	0.758916849	0.75	0.179215207	1	-1	8293779	Record_2018-04-11_13-46-S01.csv	21.38336	21.41	0.239423596	22.08	20.51	22500	21.56126722	21.58	0.19849889	22.24	20.71	49952	IMG_8086_S01.JPG_thresh.jpg	8.9	Coastal lowland forest	Forest
413	Plot6	Plot6_S02	S02	Forest	NA	NA	NA	NA	NA	NA	NA	2018_0411_132925_S02_S_CALIBRATED.JPG	0.671119307	0.733333333	0.29126152	1	-1	8294290	Record_2018-04-11_13-47-S02.csv	21.13433422	21.13	0.212325705	21.94	20.17	22500	21.10571033	21.13	0.213057337	21.94	20.17	42966	IMG_8087_S02.JPG_thresh.jpg	96.3	Coastal lowland forest	Forest
414	Plot6	Plot6_S03	S03	Forest	NA	NA	NA	NA	NA	NA	NA	2018_0411_133029_S03_S_CALIBRATED.JPG	0.73228427	0.75	0.182723876	1	-1	8294123	Record_2018-04-11_13-48-S03.csv	20.96343333	20.99	0.197921292	21.55	20.28	22500	20.99553048	21.02	0.189374629	21.72	20.28	45732	IMG_8088_S03.JPG_thresh.jpg	90.1	Coastal lowland forest	Forest
415	Plot6	Plot6_S04	S04	Forest	NA	NA	NA	NA	NA	NA	NA	2018_0411_133136_S04_S_CALIBRATED.JPG	0.738366281	0.756097561	0.177248942	1	-1	8294400	Record_2018-04-11_13-50-S04.csv	20.78305911	20.79	0.240069506	21.6	19.66	22500	20.76949941	20.76	0.271845489	21.86	19.57	49042	IMG_8089_S04.JPG_thresh.jpg	70.3	Coastal lowland forest	Forest
416	Plot6	Plot6_S05	S05	Forest	NA	NA	NA	NA	NA	NA	NA	2018_0411_133251_S05_S_CALIBRATED.JPG	0.546422518	0.692307692	0.374208068	1	-1	8294375	Record_2018-04-11_13-50-S05.csv	20.83770133	20.85	0.163051198	21.35	20.09	22500	20.73296474	20.74	0.190584392	21.35	19.94	26289	IMG_8090_S05.JPG_thresh.jpg	88.9	Coastal lowland forest	Forest
417	Plot6	Plot6_S06	S06	Forest	NA	NA	NA	NA	NA	NA	NA	NA	NA	NA	NA	NA	NA	NA	NA	NA	NA	NA	NA	NA	NA	NA	NA	NA	NA	NA	NA	IMG_8091.JPG_thresh.jpg	89.8	Coastal lowland forest	Forest
418	Plot6	Plot6_S07	S07	Forest	NA	NA	NA	NA	NA	NA	NA	NA	NA	NA	NA	NA	NA	NA	NA	NA	NA	NA	NA	NA	NA	NA	NA	NA	NA	NA	NA	IMG_8092.JPG_thresh.jpg	67.1	Coastal lowland forest	Forest
419	Plot6	Plot6_S08	S08	Forest	NA	NA	NA	NA	NA	NA	NA	NA	NA	NA	NA	NA	NA	NA	NA	NA	NA	NA	NA	NA	NA	NA	NA	NA	NA	NA	NA	IMG_8093.JPG_thresh.jpg	99.5	Coastal lowland forest	Forest
420	Plot6	Plot6_S09	S09	Forest	NA	NA	NA	NA	NA	NA	NA	NA	NA	NA	NA	NA	NA	NA	NA	NA	NA	NA	NA	NA	NA	NA	NA	NA	NA	NA	NA	IMG_8094.JPG_thresh.jpg	90.1	Coastal lowland forest	Forest
421	Plot6	Plot6_S10	S10	Forest	NA	NA	NA	NA	NA	NA	NA	NA	NA	NA	NA	NA	NA	NA	NA	NA	NA	NA	NA	NA	NA	NA	NA	NA	NA	NA	NA	IMG_8095.JPG_thresh.jpg	97.6	Coastal lowland forest	Forest
422	Plot6	Plot6_S11	S11	Forest	NA	NA	NA	NA	NA	NA	NA	NA	NA	NA	NA	NA	NA	NA	NA	NA	NA	NA	NA	NA	NA	NA	NA	NA	NA	NA	NA	IMG_8096.JPG_thresh.jpg	78.1	Coastal lowland forest	Forest
423	Plot6	Plot6_S12	S12	Forest	NA	NA	NA	NA	NA	NA	NA	NA	NA	NA	NA	NA	NA	NA	NA	NA	NA	NA	NA	NA	NA	NA	NA	NA	NA	NA	NA	IMG_8097.JPG_thresh.jpg	99.9	Coastal lowland forest	Forest
424	Plot6	Plot6_S13	S13	Forest	NA	NA	NA	NA	NA	NA	NA	NA	NA	NA	NA	NA	NA	NA	NA	NA	NA	NA	NA	NA	NA	NA	NA	NA	NA	NA	NA	IMG_8098.JPG_thresh.jpg	99.6	Coastal lowland forest	Forest
425	Plot9	Plot9_S01	S01	Forest	NA	NA	NA	NA	NA	NA	NA	2018_0412_075957_S01_S_CALIBRATED.JPG	0.234410328	0	0.466007997	1	-1	8259925	Record_2018-04-12_08-10-S01.csv	20.37657467	20.4	0.18571821	20.99	19.72	22500	20.31104373	20.31	0.182938775	20.93	19.6	48384	IMG_8124_S01.JPG_thresh.jpg	71.6	Coastal lowland forest	Forest
426	Plot9	Plot9_S02	S02	Forest	NA	NA	NA	NA	NA	NA	NA	2018_0412_080112_S02_S_CALIBRATED.JPG	0.24584714	0	0.477765672	1	-1	8247944	Record_2018-04-12_08-10-S02.csv	20.47329333	20.48	0.164910125	21.07	19.83	22500	20.5204937	20.51	0.206246007	21.41	19.83	47235	IMG_8125_S02.JPG_thresh.jpg	97.2	Coastal lowland forest	Forest
427	Plot9	Plot9_S03	S03	Forest	NA	NA	NA	NA	NA	NA	NA	2018_0412_080249_S03_S_CALIBRATED.JPG	0.324186468	0	0.47466769	1	-1	8274606	Record_2018-04-12_08-12-S03.csv	20.165452	20.17	0.163434175	20.71	19.49	22500	20.09556035	20.09	0.166986055	20.68	19.34	38485	IMG_8126_S03.JPG_thresh.jpg	75.1	Coastal lowland forest	Forest
428	Plot9	Plot9_S04	S04	Forest	NA	NA	NA	NA	NA	NA	NA	2018_0412_080318_S04_S_CALIBRATED.JPG	0.237056072	0	0.49106531	1	-1	8258882	Record_2018-04-12_08-13-S04.csv	20.14101289	20.14	0.137205416	20.68	19.57	22500	20.16541534	20.17	0.142522731	21.02	19.57	52030	IMG_8127_S04.JPG_thresh.jpg	95.8	Coastal lowland forest	Forest
429	Plot9	Plot9_S05	S05	Forest	NA	NA	NA	NA	NA	NA	NA	2018_0412_075908_S05_S_CALIBRATED.JPG	0.160698918	0	0.377579423	1	-1	8233196	Record_2018-04-12_08-09-S05.csv	20.80841244	20.79	0.129269435	21.35	20.34	22500	20.79804051	20.79	0.165023915	21.49	19.92	55647	IMG_8123_S05.JPG_thresh.jpg	90.7	Coastal lowland forest	Forest
430	Plot9	Plot9_S06	S06	Forest	NA	NA	NA	NA	NA	NA	NA	NA	NA	NA	NA	NA	NA	NA	NA	NA	NA	NA	NA	NA	NA	NA	NA	NA	NA	NA	NA	IMG_8128.JPG_thresh.jpg	94.9	Coastal lowland forest	Forest
431	Plot9	Plot9_S07	S07	Forest	NA	NA	NA	NA	NA	NA	NA	NA	NA	NA	NA	NA	NA	NA	NA	NA	NA	NA	NA	NA	NA	NA	NA	NA	NA	NA	NA	IMG_8129.JPG_thresh.jpg	96.9	Coastal lowland forest	Forest
432	Plot9	Plot9_S08	S08	Forest	NA	NA	NA	NA	NA	NA	NA	NA	NA	NA	NA	NA	NA	NA	NA	NA	NA	NA	NA	NA	NA	NA	NA	NA	NA	NA	NA	IMG_8130.JPG_thresh.jpg	92.5	Coastal lowland forest	Forest
433	Plot9	Plot9_S09	S09	Forest	NA	NA	NA	NA	NA	NA	NA	NA	NA	NA	NA	NA	NA	NA	NA	NA	NA	NA	NA	NA	NA	NA	NA	NA	NA	NA	NA	IMG_8131.JPG_thresh.jpg	99.1	Coastal lowland forest	Forest
434	Plot9	Plot9_S10	S10	Forest	NA	NA	NA	NA	NA	NA	NA	NA	NA	NA	NA	NA	NA	NA	NA	NA	NA	NA	NA	NA	NA	NA	NA	NA	NA	NA	NA	IMG_8132.JPG_thresh.jpg	69.4	Coastal lowland forest	Forest
435	Plot9	Plot9_S11	S11	Forest	NA	NA	NA	NA	NA	NA	NA	NA	NA	NA	NA	NA	NA	NA	NA	NA	NA	NA	NA	NA	NA	NA	NA	NA	NA	NA	NA	IMG_8133.JPG_thresh.jpg	96.4	Coastal lowland forest	Forest
436	Plot9	Plot9_S12	S12	Forest	NA	NA	NA	NA	NA	NA	NA	NA	NA	NA	NA	NA	NA	NA	NA	NA	NA	NA	NA	NA	NA	NA	NA	NA	NA	NA	NA	IMG_8134.JPG_thresh.jpg	91.7	Coastal lowland forest	Forest
437	Plot9	Plot9_S13	S13	Forest	NA	NA	NA	NA	NA	NA	NA	NA	NA	NA	NA	NA	NA	NA	NA	NA	NA	NA	NA	NA	NA	NA	NA	NA	NA	NA	NA	IMG_8135.JPG_thresh.jpg	90.9	Coastal lowland forest	Forest
438	Plot1	Plot1_S01	S01	Forest	NA	NA	NA	NA	NA	NA	NA	NA	NA	NA	NA	NA	NA	NA	NA	NA	NA	NA	NA	NA	NA	NA	NA	NA	NA	NA	NA	IMG_0022_S01.JPG_thresh.jpg	15.5	Coastal scarp forest	Forest
439	Plot1	Plot1_S02	S02	Forest	NA	NA	NA	NA	NA	NA	NA	NA	NA	NA	NA	NA	NA	NA	NA	NA	NA	NA	NA	NA	NA	NA	NA	NA	NA	NA	NA	IMG_0023_S02.JPG_thresh.jpg	93.9	Coastal scarp forest	Forest
440	Plot1	Plot1_S03	S03	Forest	NA	NA	NA	NA	NA	NA	NA	NA	NA	NA	NA	NA	NA	NA	NA	NA	NA	NA	NA	NA	NA	NA	NA	NA	NA	NA	NA	IMG_0024_S03.JPG_thresh.jpg	68.6	Coastal scarp forest	Forest
441	Plot1	Plot1_S04	S04	Forest	NA	NA	NA	NA	NA	NA	NA	NA	NA	NA	NA	NA	NA	NA	NA	NA	NA	NA	NA	NA	NA	NA	NA	NA	NA	NA	NA	IMG_0025_S04.JPG_thresh.jpg	74.9	Coastal scarp forest	Forest
442	Plot1	Plot1_S05	S05	Forest	NA	NA	NA	NA	NA	NA	NA	NA	NA	NA	NA	NA	NA	NA	NA	NA	NA	NA	NA	NA	NA	NA	NA	NA	NA	NA	NA	IMG_0026_S05.JPG_thresh.jpg	65.5	Coastal scarp forest	Forest
443	Plot1	Plot1_S06	S06	Forest	NA	NA	NA	NA	NA	NA	NA	NA	NA	NA	NA	NA	NA	NA	NA	NA	NA	NA	NA	NA	NA	NA	NA	NA	NA	NA	NA	IMG_0027_S06.JPG_thresh.jpg	93.5	Coastal scarp forest	Forest
444	Plot1	Plot1_S07	S07	Forest	NA	NA	NA	NA	NA	NA	NA	NA	NA	NA	NA	NA	NA	NA	NA	NA	NA	NA	NA	NA	NA	NA	NA	NA	NA	NA	NA	IMG_0028_S07.JPG_thresh.jpg	36.6	Coastal scarp forest	Forest
445	Plot1	Plot1_S08	S08	Forest	NA	NA	NA	NA	NA	NA	NA	NA	NA	NA	NA	NA	NA	NA	NA	NA	NA	NA	NA	NA	NA	NA	NA	NA	NA	NA	NA	IMG_0029_S08.JPG_thresh.jpg	17.8	Coastal scarp forest	Forest
446	Plot1	Plot1_S09	S09	Forest	NA	NA	NA	NA	NA	NA	NA	NA	NA	NA	NA	NA	NA	NA	NA	NA	NA	NA	NA	NA	NA	NA	NA	NA	NA	NA	NA	IMG_0030_S09.JPG_thresh.jpg	55.7	Coastal scarp forest	Forest
447	Plot1	Plot1_S10	S10	Forest	NA	NA	NA	NA	NA	NA	NA	NA	NA	NA	NA	NA	NA	NA	NA	NA	NA	NA	NA	NA	NA	NA	NA	NA	NA	NA	NA	IMG_0031_S10.JPG_thresh.jpg	95.4	Coastal scarp forest	Forest
448	Plot1	Plot1_S11	S11	Forest	NA	NA	NA	NA	NA	NA	NA	NA	NA	NA	NA	NA	NA	NA	NA	NA	NA	NA	NA	NA	NA	NA	NA	NA	NA	NA	NA	IMG_0032_S11.JPG_thresh.jpg	77.1	Coastal scarp forest	Forest
449	Plot1	Plot1_S12	S12	Forest	NA	NA	NA	NA	NA	NA	NA	NA	NA	NA	NA	NA	NA	NA	NA	NA	NA	NA	NA	NA	NA	NA	NA	NA	NA	NA	NA	IMG_0033_S12.JPG_thresh.jpg	87.9	Coastal scarp forest	Forest
450	Plot2	Plot2_S01	S01	Forest	NA	NA	NA	NA	NA	NA	NA	NA	NA	NA	NA	NA	NA	NA	NA	NA	NA	NA	NA	NA	NA	NA	NA	NA	NA	NA	NA	IMG_0066_S01.JPG_thresh.jpg	11.6	Coastal scarp forest	Forest
451	Plot2	Plot2_S02	S02	Forest	NA	NA	NA	NA	NA	NA	NA	NA	NA	NA	NA	NA	NA	NA	NA	NA	NA	NA	NA	NA	NA	NA	NA	NA	NA	NA	NA	IMG_0077_S02.JPG_thresh.jpg	79	Coastal scarp forest	Forest
452	Plot2	Plot2_S03	S03	Forest	NA	NA	NA	NA	NA	NA	NA	NA	NA	NA	NA	NA	NA	NA	NA	NA	NA	NA	NA	NA	NA	NA	NA	NA	NA	NA	NA	IMG_0076_S03.JPG_thresh.jpg	84.8	Coastal scarp forest	Forest
453	Plot2	Plot2_S04	S04	Forest	NA	NA	NA	NA	NA	NA	NA	NA	NA	NA	NA	NA	NA	NA	NA	NA	NA	NA	NA	NA	NA	NA	NA	NA	NA	NA	NA	IMG_0075_S04.JPG_thresh.jpg	10.6	Coastal scarp forest	Forest
454	Plot2	Plot2_S05	S05	Forest	NA	NA	NA	NA	NA	NA	NA	NA	NA	NA	NA	NA	NA	NA	NA	NA	NA	NA	NA	NA	NA	NA	NA	NA	NA	NA	NA	IMG_0073_S05.JPG_thresh.jpg	86.4	Coastal scarp forest	Forest
455	Plot2	Plot2_S06	S06	Forest	NA	NA	NA	NA	NA	NA	NA	NA	NA	NA	NA	NA	NA	NA	NA	NA	NA	NA	NA	NA	NA	NA	NA	NA	NA	NA	NA	IMG_0074_S06.JPG_thresh.jpg	51.8	Coastal scarp forest	Forest
456	Plot2	Plot2_S07	S07	Forest	NA	NA	NA	NA	NA	NA	NA	NA	NA	NA	NA	NA	NA	NA	NA	NA	NA	NA	NA	NA	NA	NA	NA	NA	NA	NA	NA	IMG_0072_S07.JPG_thresh.jpg	73.7	Coastal scarp forest	Forest
457	Plot2	Plot2_S08	S08	Forest	NA	NA	NA	NA	NA	NA	NA	NA	NA	NA	NA	NA	NA	NA	NA	NA	NA	NA	NA	NA	NA	NA	NA	NA	NA	NA	NA	IMG_0070_S08.JPG_thresh.jpg	87	Coastal scarp forest	Forest
458	Plot2	Plot2_S09	S09	Forest	NA	NA	NA	NA	NA	NA	NA	NA	NA	NA	NA	NA	NA	NA	NA	NA	NA	NA	NA	NA	NA	NA	NA	NA	NA	NA	NA	IMG_0071_S09.JPG_thresh.jpg	68	Coastal scarp forest	Forest
459	Plot2	Plot2_S10	S10	Forest	NA	NA	NA	NA	NA	NA	NA	NA	NA	NA	NA	NA	NA	NA	NA	NA	NA	NA	NA	NA	NA	NA	NA	NA	NA	NA	NA	IMG_0068_S10.JPG_thresh.jpg	33.3	Coastal scarp forest	Forest
460	Plot2	Plot2_S11	S11	Forest	NA	NA	NA	NA	NA	NA	NA	NA	NA	NA	NA	NA	NA	NA	NA	NA	NA	NA	NA	NA	NA	NA	NA	NA	NA	NA	NA	IMG_0067_S11.JPG_thresh.jpg	78.6	Coastal scarp forest	Forest
461	Plot2	Plot2_S12	S12	Forest	NA	NA	NA	NA	NA	NA	NA	NA	NA	NA	NA	NA	NA	NA	NA	NA	NA	NA	NA	NA	NA	NA	NA	NA	NA	NA	NA	IMG_0069_S12.JPG_thresh.jpg	18.7	Coastal scarp forest	Forest
462	Plot41	Plot41_S01	S01	Woodland	NA	NA	NA	NA	NA	NA	NA	NA	NA	NA	NA	NA	NA	NA	NA	NA	NA	NA	NA	NA	NA	NA	NA	NA	NA	NA	NA	IMG_8581.JPG_thresh.jpg	72.3	Acacia Woodland	Woodland
463	Plot41	Plot41_S02	S02	Woodland	NA	NA	NA	NA	NA	NA	NA	NA	NA	NA	NA	NA	NA	NA	NA	NA	NA	NA	NA	NA	NA	NA	NA	NA	NA	NA	NA	IMG_8582.JPG_thresh.jpg	88.8	Acacia Woodland	Woodland
464	Plot41	Plot41_S03	S03	Woodland	NA	NA	NA	NA	NA	NA	NA	NA	NA	NA	NA	NA	NA	NA	NA	NA	NA	NA	NA	NA	NA	NA	NA	NA	NA	NA	NA	IMG_8583.JPG_thresh.jpg	88.2	Acacia Woodland	Woodland
465	Plot41	Plot41_S04	S04	Woodland	NA	NA	NA	NA	NA	NA	NA	NA	NA	NA	NA	NA	NA	NA	NA	NA	NA	NA	NA	NA	NA	NA	NA	NA	NA	NA	NA	IMG_8584.JPG_thresh.jpg	18.7	Acacia Woodland	Woodland
466	Plot41	Plot41_S05	S05	Woodland	NA	NA	NA	NA	NA	NA	NA	NA	NA	NA	NA	NA	NA	NA	NA	NA	NA	NA	NA	NA	NA	NA	NA	NA	NA	NA	NA	IMG_8585.JPG_thresh.jpg	11.9	Acacia Woodland	Woodland
467	Plot41	Plot41_S06	S06	Woodland	NA	NA	NA	NA	NA	NA	NA	NA	NA	NA	NA	NA	NA	NA	NA	NA	NA	NA	NA	NA	NA	NA	NA	NA	NA	NA	NA	IMG_8586.JPG_thresh.jpg	79.2	Acacia Woodland	Woodland
468	Plot41	Plot41_S07	S07	Woodland	NA	NA	NA	NA	NA	NA	NA	NA	NA	NA	NA	NA	NA	NA	NA	NA	NA	NA	NA	NA	NA	NA	NA	NA	NA	NA	NA	IMG_8587.JPG_thresh.jpg	96.8	Acacia Woodland	Woodland
469	Plot41	Plot41_S08	S08	Woodland	NA	NA	NA	NA	NA	NA	NA	NA	NA	NA	NA	NA	NA	NA	NA	NA	NA	NA	NA	NA	NA	NA	NA	NA	NA	NA	NA	IMG_8588.JPG_thresh.jpg	78.9	Acacia Woodland	Woodland
470	Plot41	Plot41_S09	S09	Woodland	NA	NA	NA	NA	NA	NA	NA	NA	NA	NA	NA	NA	NA	NA	NA	NA	NA	NA	NA	NA	NA	NA	NA	NA	NA	NA	NA	IMG_8589.JPG_thresh.jpg	90.1	Acacia Woodland	Woodland
471	Plot42	Plot42_S01	S01	Woodland	NA	NA	NA	NA	NA	NA	NA	NA	NA	NA	NA	NA	NA	NA	NA	NA	NA	NA	NA	NA	NA	NA	NA	NA	NA	NA	NA	IMG_8590.JPG_thresh.jpg	51	Acacia Woodland	Woodland
472	Plot42	Plot42_S02	S02	Woodland	NA	NA	NA	NA	NA	NA	NA	NA	NA	NA	NA	NA	NA	NA	NA	NA	NA	NA	NA	NA	NA	NA	NA	NA	NA	NA	NA	IMG_8591.JPG_thresh.jpg	71.4	Acacia Woodland	Woodland
473	Plot42	Plot42_S03	S03	Woodland	NA	NA	NA	NA	NA	NA	NA	NA	NA	NA	NA	NA	NA	NA	NA	NA	NA	NA	NA	NA	NA	NA	NA	NA	NA	NA	NA	IMG_8592.JPG_thresh.jpg	77.6	Acacia Woodland	Woodland
474	Plot42	Plot42_S04	S04	Woodland	NA	NA	NA	NA	NA	NA	NA	NA	NA	NA	NA	NA	NA	NA	NA	NA	NA	NA	NA	NA	NA	NA	NA	NA	NA	NA	NA	IMG_8593.JPG_thresh.jpg	82.4	Acacia Woodland	Woodland
475	Plot42	Plot42_S05	S05	Woodland	NA	NA	NA	NA	NA	NA	NA	NA	NA	NA	NA	NA	NA	NA	NA	NA	NA	NA	NA	NA	NA	NA	NA	NA	NA	NA	NA	IMG_8594.JPG_thresh.jpg	24	Acacia Woodland	Woodland
476	Plot42	Plot42_S06	S06	Woodland	NA	NA	NA	NA	NA	NA	NA	NA	NA	NA	NA	NA	NA	NA	NA	NA	NA	NA	NA	NA	NA	NA	NA	NA	NA	NA	NA	IMG_8595.JPG_thresh.jpg	43	Acacia Woodland	Woodland
477	Plot42	Plot42_S07	S07	Woodland	NA	NA	NA	NA	NA	NA	NA	NA	NA	NA	NA	NA	NA	NA	NA	NA	NA	NA	NA	NA	NA	NA	NA	NA	NA	NA	NA	IMG_8596.JPG_thresh.jpg	57.8	Acacia Woodland	Woodland
478	Plot42	Plot42_S08	S08	Woodland	NA	NA	NA	NA	NA	NA	NA	NA	NA	NA	NA	NA	NA	NA	NA	NA	NA	NA	NA	NA	NA	NA	NA	NA	NA	NA	NA	IMG_8597.JPG_thresh.jpg	76.9	Acacia Woodland	Woodland
479	Plot42	Plot42_S09	S09	Woodland	NA	NA	NA	NA	NA	NA	NA	NA	NA	NA	NA	NA	NA	NA	NA	NA	NA	NA	NA	NA	NA	NA	NA	NA	NA	NA	NA	IMG_8598.JPG_thresh.jpg	55.5	Acacia Woodland	Woodland
480	Plot42	Plot42_S10	S10	Woodland	NA	NA	NA	NA	NA	NA	NA	NA	NA	NA	NA	NA	NA	NA	NA	NA	NA	NA	NA	NA	NA	NA	NA	NA	NA	NA	NA	IMG_8599.JPG_thresh.jpg	0.1	Acacia Woodland	Woodland
481	Plot43	Plot43_S01	S01	Woodland	NA	NA	NA	NA	NA	NA	NA	NA	NA	NA	NA	NA	NA	NA	NA	NA	NA	NA	NA	NA	NA	NA	NA	NA	NA	NA	NA	IMG_8600.JPG_thresh.jpg	57.8	Acacia Woodland	Woodland
482	Plot43	Plot43_S02	S02	Woodland	NA	NA	NA	NA	NA	NA	NA	NA	NA	NA	NA	NA	NA	NA	NA	NA	NA	NA	NA	NA	NA	NA	NA	NA	NA	NA	NA	IMG_8601.JPG_thresh.jpg	92.1	Acacia Woodland	Woodland
483	Plot43	Plot43_S03	S03	Woodland	NA	NA	NA	NA	NA	NA	NA	NA	NA	NA	NA	NA	NA	NA	NA	NA	NA	NA	NA	NA	NA	NA	NA	NA	NA	NA	NA	IMG_8602.JPG_thresh.jpg	38.2	Acacia Woodland	Woodland
484	Plot43	Plot43_S04	S04	Woodland	NA	NA	NA	NA	NA	NA	NA	NA	NA	NA	NA	NA	NA	NA	NA	NA	NA	NA	NA	NA	NA	NA	NA	NA	NA	NA	NA	IMG_8603.JPG_thresh.jpg	89.3	Acacia Woodland	Woodland
485	Plot43	Plot43_S05	S05	Woodland	NA	NA	NA	NA	NA	NA	NA	NA	NA	NA	NA	NA	NA	NA	NA	NA	NA	NA	NA	NA	NA	NA	NA	NA	NA	NA	NA	IMG_8604.JPG_thresh.jpg	78.7	Acacia Woodland	Woodland
486	Plot43	Plot43_S06	S06	Woodland	NA	NA	NA	NA	NA	NA	NA	NA	NA	NA	NA	NA	NA	NA	NA	NA	NA	NA	NA	NA	NA	NA	NA	NA	NA	NA	NA	IMG_8605.JPG_thresh.jpg	73.6	Acacia Woodland	Woodland
487	Plot43	Plot43_S07	S07	Woodland	NA	NA	NA	NA	NA	NA	NA	NA	NA	NA	NA	NA	NA	NA	NA	NA	NA	NA	NA	NA	NA	NA	NA	NA	NA	NA	NA	IMG_8606.JPG_thresh.jpg	80.1	Acacia Woodland	Woodland
488	Plot43	Plot43_S08	S08	Woodland	NA	NA	NA	NA	NA	NA	NA	NA	NA	NA	NA	NA	NA	NA	NA	NA	NA	NA	NA	NA	NA	NA	NA	NA	NA	NA	NA	IMG_8607.JPG_thresh.jpg	90.8	Acacia Woodland	Woodland
489	Plot43	Plot43_S09	S09	Woodland	NA	NA	NA	NA	NA	NA	NA	NA	NA	NA	NA	NA	NA	NA	NA	NA	NA	NA	NA	NA	NA	NA	NA	NA	NA	NA	NA	IMG_8608.JPG_thresh.jpg	92.9	Acacia Woodland	Woodland
490	Plot43	Plot43_S10	S10	Woodland	NA	NA	NA	NA	NA	NA	NA	NA	NA	NA	NA	NA	NA	NA	NA	NA	NA	NA	NA	NA	NA	NA	NA	NA	NA	NA	NA	IMG_8609.JPG_thresh.jpg	74.4	Acacia Woodland	Woodland
491	Plot44	Plot44_S01	S01	Woodland	NA	NA	NA	NA	NA	NA	NA	NA	NA	NA	NA	NA	NA	NA	NA	NA	NA	NA	NA	NA	NA	NA	NA	NA	NA	NA	NA	IMG_8610.JPG_thresh.jpg	78.4	Acacia Woodland	Woodland
492	Plot44	Plot44_S02	S02	Woodland	NA	NA	NA	NA	NA	NA	NA	NA	NA	NA	NA	NA	NA	NA	NA	NA	NA	NA	NA	NA	NA	NA	NA	NA	NA	NA	NA	IMG_8611.JPG_thresh.jpg	0.9	Acacia Woodland	Woodland
493	Plot44	Plot44_S03	S03	Woodland	NA	NA	NA	NA	NA	NA	NA	NA	NA	NA	NA	NA	NA	NA	NA	NA	NA	NA	NA	NA	NA	NA	NA	NA	NA	NA	NA	IMG_8612.JPG_thresh.jpg	89.7	Acacia Woodland	Woodland
494	Plot44	Plot44_S04	S04	Woodland	NA	NA	NA	NA	NA	NA	NA	NA	NA	NA	NA	NA	NA	NA	NA	NA	NA	NA	NA	NA	NA	NA	NA	NA	NA	NA	NA	IMG_8613.JPG_thresh.jpg	75.4	Acacia Woodland	Woodland
495	Plot44	Plot44_S05	S05	Woodland	NA	NA	NA	NA	NA	NA	NA	NA	NA	NA	NA	NA	NA	NA	NA	NA	NA	NA	NA	NA	NA	NA	NA	NA	NA	NA	NA	IMG_8614.JPG_thresh.jpg	61.8	Acacia Woodland	Woodland
496	Plot44	Plot44_S06	S06	Woodland	NA	NA	NA	NA	NA	NA	NA	NA	NA	NA	NA	NA	NA	NA	NA	NA	NA	NA	NA	NA	NA	NA	NA	NA	NA	NA	NA	IMG_8615.JPG_thresh.jpg	60	Acacia Woodland	Woodland
497	Plot44	Plot44_S07	S07	Woodland	NA	NA	NA	NA	NA	NA	NA	NA	NA	NA	NA	NA	NA	NA	NA	NA	NA	NA	NA	NA	NA	NA	NA	NA	NA	NA	NA	IMG_8616.JPG_thresh.jpg	83.6	Acacia Woodland	Woodland
498	Plot44	Plot44_S08	S08	Woodland	NA	NA	NA	NA	NA	NA	NA	NA	NA	NA	NA	NA	NA	NA	NA	NA	NA	NA	NA	NA	NA	NA	NA	NA	NA	NA	NA	IMG_8617.JPG_thresh.jpg	66.9	Acacia Woodland	Woodland
499	Plot44	Plot44_S09	S09	Woodland	NA	NA	NA	NA	NA	NA	NA	NA	NA	NA	NA	NA	NA	NA	NA	NA	NA	NA	NA	NA	NA	NA	NA	NA	NA	NA	NA	IMG_8618.JPG_thresh.jpg	54.7	Acacia Woodland	Woodland
500	Plot44	Plot44_S10	S10	Woodland	NA	NA	NA	NA	NA	NA	NA	NA	NA	NA	NA	NA	NA	NA	NA	NA	NA	NA	NA	NA	NA	NA	NA	NA	NA	NA	NA	IMG_8619.JPG_thresh.jpg	62	Acacia Woodland	Woodland
501	Plot45	Plot45_S01	S01	Woodland	NA	NA	NA	NA	NA	NA	NA	NA	NA	NA	NA	NA	NA	NA	NA	NA	NA	NA	NA	NA	NA	NA	NA	NA	NA	NA	NA	IMG_8620.JPG_thresh.jpg	85.9	Acacia Woodland	Woodland
502	Plot45	Plot45_S02	S02	Woodland	NA	NA	NA	NA	NA	NA	NA	NA	NA	NA	NA	NA	NA	NA	NA	NA	NA	NA	NA	NA	NA	NA	NA	NA	NA	NA	NA	IMG_8621.JPG_thresh.jpg	91	Acacia Woodland	Woodland
503	Plot45	Plot45_S03	S03	Woodland	NA	NA	NA	NA	NA	NA	NA	NA	NA	NA	NA	NA	NA	NA	NA	NA	NA	NA	NA	NA	NA	NA	NA	NA	NA	NA	NA	IMG_8622.JPG_thresh.jpg	32.4	Acacia Woodland	Woodland
504	Plot45	Plot45_S04	S04	Woodland	NA	NA	NA	NA	NA	NA	NA	NA	NA	NA	NA	NA	NA	NA	NA	NA	NA	NA	NA	NA	NA	NA	NA	NA	NA	NA	NA	IMG_8623.JPG_thresh.jpg	76	Acacia Woodland	Woodland
505	Plot45	Plot45_S05	S05	Woodland	NA	NA	NA	NA	NA	NA	NA	NA	NA	NA	NA	NA	NA	NA	NA	NA	NA	NA	NA	NA	NA	NA	NA	NA	NA	NA	NA	IMG_8624.JPG_thresh.jpg	92.7	Acacia Woodland	Woodland
506	Plot45	Plot45_S06	S06	Woodland	NA	NA	NA	NA	NA	NA	NA	NA	NA	NA	NA	NA	NA	NA	NA	NA	NA	NA	NA	NA	NA	NA	NA	NA	NA	NA	NA	IMG_8625.JPG_thresh.jpg	98.9	Acacia Woodland	Woodland
507	Plot45	Plot45_S07	S07	Woodland	NA	NA	NA	NA	NA	NA	NA	NA	NA	NA	NA	NA	NA	NA	NA	NA	NA	NA	NA	NA	NA	NA	NA	NA	NA	NA	NA	IMG_8626.JPG_thresh.jpg	95.7	Acacia Woodland	Woodland
508	Plot45	Plot45_S08	S08	Woodland	NA	NA	NA	NA	NA	NA	NA	NA	NA	NA	NA	NA	NA	NA	NA	NA	NA	NA	NA	NA	NA	NA	NA	NA	NA	NA	NA	IMG_8627.JPG_thresh.jpg	93.2	Acacia Woodland	Woodland
509	Plot45	Plot45_S09	S09	Woodland	NA	NA	NA	NA	NA	NA	NA	NA	NA	NA	NA	NA	NA	NA	NA	NA	NA	NA	NA	NA	NA	NA	NA	NA	NA	NA	NA	IMG_8628.JPG_thresh.jpg	5.5	Acacia Woodland	Woodland
510	Plot46	Plot46_S01	S01	Woodland	NA	NA	NA	NA	NA	NA	NA	NA	NA	NA	NA	NA	NA	NA	NA	NA	NA	NA	NA	NA	NA	NA	NA	NA	NA	NA	NA	IMG_8629.JPG_thresh.jpg	94.8	Acacia Woodland	Woodland
511	Plot46	Plot46_S02	S02	Woodland	NA	NA	NA	NA	NA	NA	NA	NA	NA	NA	NA	NA	NA	NA	NA	NA	NA	NA	NA	NA	NA	NA	NA	NA	NA	NA	NA	IMG_8630.JPG_thresh.jpg	97.8	Acacia Woodland	Woodland
512	Plot46	Plot46_S03	S03	Woodland	NA	NA	NA	NA	NA	NA	NA	NA	NA	NA	NA	NA	NA	NA	NA	NA	NA	NA	NA	NA	NA	NA	NA	NA	NA	NA	NA	IMG_8631.JPG_thresh.jpg	74.7	Acacia Woodland	Woodland
513	Plot46	Plot46_S04	S04	Woodland	NA	NA	NA	NA	NA	NA	NA	NA	NA	NA	NA	NA	NA	NA	NA	NA	NA	NA	NA	NA	NA	NA	NA	NA	NA	NA	NA	IMG_8632.JPG_thresh.jpg	94.8	Acacia Woodland	Woodland
514	Plot46	Plot46_S05	S05	Woodland	NA	NA	NA	NA	NA	NA	NA	NA	NA	NA	NA	NA	NA	NA	NA	NA	NA	NA	NA	NA	NA	NA	NA	NA	NA	NA	NA	IMG_8633.JPG_thresh.jpg	75.6	Acacia Woodland	Woodland
515	Plot46	Plot46_S06	S06	Woodland	NA	NA	NA	NA	NA	NA	NA	NA	NA	NA	NA	NA	NA	NA	NA	NA	NA	NA	NA	NA	NA	NA	NA	NA	NA	NA	NA	IMG_8634.JPG_thresh.jpg	10.9	Acacia Woodland	Woodland
516	Plot46	Plot46_S07	S07	Woodland	NA	NA	NA	NA	NA	NA	NA	NA	NA	NA	NA	NA	NA	NA	NA	NA	NA	NA	NA	NA	NA	NA	NA	NA	NA	NA	NA	IMG_8635.JPG_thresh.jpg	94	Acacia Woodland	Woodland
517	Plot46	Plot46_S08	S08	Woodland	NA	NA	NA	NA	NA	NA	NA	NA	NA	NA	NA	NA	NA	NA	NA	NA	NA	NA	NA	NA	NA	NA	NA	NA	NA	NA	NA	IMG_8636.JPG_thresh.jpg	74.1	Acacia Woodland	Woodland
518	Plot46	Plot46_S09	S09	Woodland	NA	NA	NA	NA	NA	NA	NA	NA	NA	NA	NA	NA	NA	NA	NA	NA	NA	NA	NA	NA	NA	NA	NA	NA	NA	NA	NA	IMG_8637.JPG_thresh.jpg	82	Acacia Woodland	Woodland
519	Plot47	Plot47_S01	S01	Woodland	NA	NA	NA	NA	NA	NA	NA	NA	NA	NA	NA	NA	NA	NA	NA	NA	NA	NA	NA	NA	NA	NA	NA	NA	NA	NA	NA	IMG_8638.JPG_thresh.jpg	49.5	Acacia Woodland	Woodland
520	Plot47	Plot47_S02	S02	Woodland	NA	NA	NA	NA	NA	NA	NA	NA	NA	NA	NA	NA	NA	NA	NA	NA	NA	NA	NA	NA	NA	NA	NA	NA	NA	NA	NA	IMG_8639.JPG_thresh.jpg	91.3	Acacia Woodland	Woodland
521	Plot47	Plot47_S03	S03	Woodland	NA	NA	NA	NA	NA	NA	NA	NA	NA	NA	NA	NA	NA	NA	NA	NA	NA	NA	NA	NA	NA	NA	NA	NA	NA	NA	NA	IMG_8640.JPG_thresh.jpg	71.7	Acacia Woodland	Woodland
522	Plot47	Plot47_S04	S04	Woodland	NA	NA	NA	NA	NA	NA	NA	NA	NA	NA	NA	NA	NA	NA	NA	NA	NA	NA	NA	NA	NA	NA	NA	NA	NA	NA	NA	IMG_8641.JPG_thresh.jpg	70.7	Acacia Woodland	Woodland
523	Plot47	Plot47_S05	S05	Woodland	NA	NA	NA	NA	NA	NA	NA	NA	NA	NA	NA	NA	NA	NA	NA	NA	NA	NA	NA	NA	NA	NA	NA	NA	NA	NA	NA	IMG_8642.JPG_thresh.jpg	89.3	Acacia Woodland	Woodland
524	Plot47	Plot47_S06	S06	Woodland	NA	NA	NA	NA	NA	NA	NA	NA	NA	NA	NA	NA	NA	NA	NA	NA	NA	NA	NA	NA	NA	NA	NA	NA	NA	NA	NA	IMG_8643.JPG_thresh.jpg	91	Acacia Woodland	Woodland
525	Plot47	Plot47_S07	S07	Woodland	NA	NA	NA	NA	NA	NA	NA	NA	NA	NA	NA	NA	NA	NA	NA	NA	NA	NA	NA	NA	NA	NA	NA	NA	NA	NA	NA	IMG_8644.JPG_thresh.jpg	81	Acacia Woodland	Woodland
526	Plot47	Plot47_S08	S08	Woodland	NA	NA	NA	NA	NA	NA	NA	NA	NA	NA	NA	NA	NA	NA	NA	NA	NA	NA	NA	NA	NA	NA	NA	NA	NA	NA	NA	IMG_8645.JPG_thresh.jpg	86.5	Acacia Woodland	Woodland
527	Plot47	Plot47_S09	S09	Woodland	NA	NA	NA	NA	NA	NA	NA	NA	NA	NA	NA	NA	NA	NA	NA	NA	NA	NA	NA	NA	NA	NA	NA	NA	NA	NA	NA	IMG_8646.JPG_thresh.jpg	82.6	Acacia Woodland	Woodland
528	Plot47	Plot47_S10	S10	Woodland	NA	NA	NA	NA	NA	NA	NA	NA	NA	NA	NA	NA	NA	NA	NA	NA	NA	NA	NA	NA	NA	NA	NA	NA	NA	NA	NA	IMG_8647.JPG_thresh.jpg	77.3	Acacia Woodland	Woodland
529	Plot47	Plot47_S11	S11	Woodland	NA	NA	NA	NA	NA	NA	NA	NA	NA	NA	NA	NA	NA	NA	NA	NA	NA	NA	NA	NA	NA	NA	NA	NA	NA	NA	NA	IMG_8648.JPG_thresh.jpg	89.7	Acacia Woodland	Woodland
530	PlotR1	PlotR1_S01	S01	Forest	NA	NA	NA	NA	NA	NA	NA	NA	NA	NA	NA	NA	NA	NA	NA	NA	NA	NA	NA	NA	NA	NA	NA	NA	NA	NA	NA	IMG_0034.JPG_thresh.jpg	82.7	Coastal scarp forest	Forest
531	PlotR1	PlotR1_S02	S02	Forest	NA	NA	NA	NA	NA	NA	NA	NA	NA	NA	NA	NA	NA	NA	NA	NA	NA	NA	NA	NA	NA	NA	NA	NA	NA	NA	NA	IMG_0035.JPG_thresh.jpg	85	Coastal scarp forest	Forest
532	PlotR1	PlotR1_S03	S03	Forest	NA	NA	NA	NA	NA	NA	NA	NA	NA	NA	NA	NA	NA	NA	NA	NA	NA	NA	NA	NA	NA	NA	NA	NA	NA	NA	NA	IMG_0036.JPG_thresh.jpg	69.4	Coastal scarp forest	Forest
533	PlotR1	PlotR1_S04	S04	Forest	NA	NA	NA	NA	NA	NA	NA	NA	NA	NA	NA	NA	NA	NA	NA	NA	NA	NA	NA	NA	NA	NA	NA	NA	NA	NA	NA	IMG_0037.JPG_thresh.jpg	52.5	Coastal scarp forest	Forest
534	PlotR1	PlotR1_S05	S05	Forest	NA	NA	NA	NA	NA	NA	NA	NA	NA	NA	NA	NA	NA	NA	NA	NA	NA	NA	NA	NA	NA	NA	NA	NA	NA	NA	NA	IMG_0038.JPG_thresh.jpg	88.4	Coastal scarp forest	Forest
535	PlotR1	PlotR1_S06	S06	Forest	NA	NA	NA	NA	NA	NA	NA	NA	NA	NA	NA	NA	NA	NA	NA	NA	NA	NA	NA	NA	NA	NA	NA	NA	NA	NA	NA	IMG_0039.JPG_thresh.jpg	67.3	Coastal scarp forest	Forest
536	PlotR1	PlotR1_S07	S07	Forest	NA	NA	NA	NA	NA	NA	NA	NA	NA	NA	NA	NA	NA	NA	NA	NA	NA	NA	NA	NA	NA	NA	NA	NA	NA	NA	NA	IMG_0040.JPG_thresh.jpg	10.6	Coastal scarp forest	Forest
537	PlotR1	PlotR1_S08	S08	Forest	NA	NA	NA	NA	NA	NA	NA	NA	NA	NA	NA	NA	NA	NA	NA	NA	NA	NA	NA	NA	NA	NA	NA	NA	NA	NA	NA	IMG_0041.JPG_thresh.jpg	90.8	Coastal scarp forest	Forest
538	PlotR1	PlotR1_S09	S09	Forest	NA	NA	NA	NA	NA	NA	NA	NA	NA	NA	NA	NA	NA	NA	NA	NA	NA	NA	NA	NA	NA	NA	NA	NA	NA	NA	NA	IMG_0042.JPG_thresh.jpg	46.9	Coastal scarp forest	Forest
539	PlotR1	PlotR1_S10	S10	Forest	NA	NA	NA	NA	NA	NA	NA	NA	NA	NA	NA	NA	NA	NA	NA	NA	NA	NA	NA	NA	NA	NA	NA	NA	NA	NA	NA	IMG_0043.JPG_thresh.jpg	80.6	Coastal scarp forest	Forest
540	PlotR1	PlotR1_S11	S11	Forest	NA	NA	NA	NA	NA	NA	NA	NA	NA	NA	NA	NA	NA	NA	NA	NA	NA	NA	NA	NA	NA	NA	NA	NA	NA	NA	NA	IMG_0044.JPG_thresh.jpg	55.4	Coastal scarp forest	Forest
541	PlotR1	PlotR1_S12	S12	Forest	NA	NA	NA	NA	NA	NA	NA	NA	NA	NA	NA	NA	NA	NA	NA	NA	NA	NA	NA	NA	NA	NA	NA	NA	NA	NA	NA	IMG_0045.JPG_thresh.jpg	56.4	Coastal scarp forest	Forest
542	PlotR2	PlotR2_S01	S01	Forest	NA	NA	NA	NA	NA	NA	NA	NA	NA	NA	NA	NA	NA	NA	NA	NA	NA	NA	NA	NA	NA	NA	NA	NA	NA	NA	NA	IMG_0046_S01.JPG_thresh.jpg	79.2	Coastal lowland forest	Forest
543	PlotR2	PlotR2_S02	S02	Forest	NA	NA	NA	NA	NA	NA	NA	NA	NA	NA	NA	NA	NA	NA	NA	NA	NA	NA	NA	NA	NA	NA	NA	NA	NA	NA	NA	IMG_0047_S02.JPG_thresh.jpg	28.3	Coastal lowland forest	Forest
544	PlotR2	PlotR2_S03	S03	Forest	NA	NA	NA	NA	NA	NA	NA	NA	NA	NA	NA	NA	NA	NA	NA	NA	NA	NA	NA	NA	NA	NA	NA	NA	NA	NA	NA	IMG_0048_S03.JPG_thresh.jpg	38.9	Coastal lowland forest	Forest
545	PlotR2	PlotR2_S04	S04	Forest	NA	NA	NA	NA	NA	NA	NA	NA	NA	NA	NA	NA	NA	NA	NA	NA	NA	NA	NA	NA	NA	NA	NA	NA	NA	NA	NA	IMG_0049_S04.JPG_thresh.jpg	1.6	Coastal lowland forest	Forest
546	PlotR2	PlotR2_S05	S05	Forest	NA	NA	NA	NA	NA	NA	NA	NA	NA	NA	NA	NA	NA	NA	NA	NA	NA	NA	NA	NA	NA	NA	NA	NA	NA	NA	NA	IMG_0050_S05.JPG_thresh.jpg	46.4	Coastal lowland forest	Forest
547	PlotR2	PlotR2_S06	S06	Forest	NA	NA	NA	NA	NA	NA	NA	NA	NA	NA	NA	NA	NA	NA	NA	NA	NA	NA	NA	NA	NA	NA	NA	NA	NA	NA	NA	IMG_0051_S06.JPG_thresh.jpg	58.3	Coastal lowland forest	Forest
548	PlotR2	PlotR2_S07	S07	Forest	NA	NA	NA	NA	NA	NA	NA	NA	NA	NA	NA	NA	NA	NA	NA	NA	NA	NA	NA	NA	NA	NA	NA	NA	NA	NA	NA	IMG_0052_S07.JPG_thresh.jpg	63.7	Coastal lowland forest	Forest
549	PlotR2	PlotR2_S08	S08	Forest	NA	NA	NA	NA	NA	NA	NA	NA	NA	NA	NA	NA	NA	NA	NA	NA	NA	NA	NA	NA	NA	NA	NA	NA	NA	NA	NA	IMG_0053_S08.JPG_thresh.jpg	75.9	Coastal lowland forest	Forest
550	PlotR2	PlotR2_S09	S09	Forest	NA	NA	NA	NA	NA	NA	NA	NA	NA	NA	NA	NA	NA	NA	NA	NA	NA	NA	NA	NA	NA	NA	NA	NA	NA	NA	NA	IMG_0054_S09.JPG_thresh.jpg	93.7	Coastal lowland forest	Forest
551	PlotR2	PlotR2_S10	S10	Forest	NA	NA	NA	NA	NA	NA	NA	NA	NA	NA	NA	NA	NA	NA	NA	NA	NA	NA	NA	NA	NA	NA	NA	NA	NA	NA	NA	IMG_0055_S10.JPG_thresh.jpg	74.5	Coastal lowland forest	Forest
552	PlotR3	PlotR3_S01	S01	Forest	NA	NA	NA	NA	NA	NA	NA	NA	NA	NA	NA	NA	NA	NA	NA	NA	NA	NA	NA	NA	NA	NA	NA	NA	NA	NA	NA	IMG_8111.JPG_thresh.jpg	97.8	Swamp forest	Forest
553	PlotR3	PlotR3_S02	S02	Forest	NA	NA	NA	NA	NA	NA	NA	NA	NA	NA	NA	NA	NA	NA	NA	NA	NA	NA	NA	NA	NA	NA	NA	NA	NA	NA	NA	IMG_8112.JPG_thresh.jpg	73.6	Swamp forest	Forest
554	PlotR3	PlotR3_S03	S03	Forest	NA	NA	NA	NA	NA	NA	NA	NA	NA	NA	NA	NA	NA	NA	NA	NA	NA	NA	NA	NA	NA	NA	NA	NA	NA	NA	NA	IMG_8113.JPG_thresh.jpg	98.9	Swamp forest	Forest
555	PlotR3	PlotR3_S04	S04	Forest	NA	NA	NA	NA	NA	NA	NA	NA	NA	NA	NA	NA	NA	NA	NA	NA	NA	NA	NA	NA	NA	NA	NA	NA	NA	NA	NA	IMG_8114.JPG_thresh.jpg	98.6	Swamp forest	Forest
556	PlotR3	PlotR3_S05	S05	Forest	NA	NA	NA	NA	NA	NA	NA	NA	NA	NA	NA	NA	NA	NA	NA	NA	NA	NA	NA	NA	NA	NA	NA	NA	NA	NA	NA	IMG_8115.JPG_thresh.jpg	99.7	Swamp forest	Forest
557	PlotR3	PlotR3_S06	S06	Forest	NA	NA	NA	NA	NA	NA	NA	NA	NA	NA	NA	NA	NA	NA	NA	NA	NA	NA	NA	NA	NA	NA	NA	NA	NA	NA	NA	IMG_8116.JPG_thresh.jpg	89.3	Swamp forest	Forest
558	PlotR3	PlotR3_S07	S07	Forest	NA	NA	NA	NA	NA	NA	NA	NA	NA	NA	NA	NA	NA	NA	NA	NA	NA	NA	NA	NA	NA	NA	NA	NA	NA	NA	NA	IMG_8117.JPG_thresh.jpg	94.3	Swamp forest	Forest
559	PlotR3	PlotR3_S08	S08	Forest	NA	NA	NA	NA	NA	NA	NA	NA	NA	NA	NA	NA	NA	NA	NA	NA	NA	NA	NA	NA	NA	NA	NA	NA	NA	NA	NA	IMG_8118.JPG_thresh.jpg	93.2	Swamp forest	Forest
560	PlotR3	PlotR3_S09	S09	Forest	NA	NA	NA	NA	NA	NA	NA	NA	NA	NA	NA	NA	NA	NA	NA	NA	NA	NA	NA	NA	NA	NA	NA	NA	NA	NA	NA	IMG_8119.JPG_thresh.jpg	99	Swamp forest	Forest
561	PlotR3	PlotR3_S10	S10	Forest	NA	NA	NA	NA	NA	NA	NA	NA	NA	NA	NA	NA	NA	NA	NA	NA	NA	NA	NA	NA	NA	NA	NA	NA	NA	NA	NA	IMG_8120.JPG_thresh.jpg	99.3	Swamp forest	Forest
562	PlotR3	PlotR3_S11	S11	Forest	NA	NA	NA	NA	NA	NA	NA	NA	NA	NA	NA	NA	NA	NA	NA	NA	NA	NA	NA	NA	NA	NA	NA	NA	NA	NA	NA	IMG_8121.JPG_thresh.jpg	92.1	Swamp forest	Forest
563	PlotR3	PlotR3_S12	S12	Forest	NA	NA	NA	NA	NA	NA	NA	NA	NA	NA	NA	NA	NA	NA	NA	NA	NA	NA	NA	NA	NA	NA	NA	NA	NA	NA	NA	IMG_8122.JPG_thresh.jpg	93.9	Swamp forest	Forest
