# Supplementary material for: Forest floor temperature and greenness link significantly to canopy attributes in South Africa’s fragmented coastal forests
Source: PeerJ. 2019 Jan 10;7:e6190. doi: 10.7717/peerj.6190 (PMC6330204; doi:10.7717/peerj.6190)
Supplement: Supplemental Information 5 [file peerj-07-6190-s005.xlsx]

## Sheet: Sheet1
Filename	Column_label	Explanation
dat_all_PeerJ	plot	name of plot sampled
dat_all_PeerJ	code	unique identifier for plot sample point
dat_all_PeerJ	sample	name of sample point
dat_all_PeerJ	Biome	name of habitat type
dat_all_PeerJ	filename	name of file containing ndvi ground data
dat_all_PeerJ	nav1	estimate of ground vegetation greenness - mean within window analysed
dat_all_PeerJ	nmedian1	estimate of ground vegetation greenness - median within window analysed
dat_all_PeerJ	nsd1	estimate of ground vegetation greenness - sd within window analysed
dat_all_PeerJ	nmax1	estimate of ground vegetation greenness - maximum within window analysed
dat_all_PeerJ	nmin1	estimate of ground vegetation greenness - minimum within window analysed
dat_all_PeerJ	nn1	number of pixels within window analysed for estimate of ground vegetation greenness
dat_all_PeerJ	filename_nhs	name of file containing ndvi sky data
dat_all_PeerJ	nav_s	estimate of sky vegetation greenness - mean within window analysed
dat_all_PeerJ	nmed_s	estimate of sky vegetation greenness - median within window analysed
dat_all_PeerJ	nsd_s	estimate of sky vegetation greenness - sd within window analysed
dat_all_PeerJ	nmax_s	estimate of sky vegetation greenness - maximum within window analysed
dat_all_PeerJ	nmin_s	estimate of sky vegetation greenness - minimum within window analysed
dat_all_PeerJ	nn_s	number of pixels within window analysed for estimate of sky vegetation greenness
dat_all_PeerJ	filenames_th	name of file containing thermal ground data
dat_all_PeerJ	tav	estimate of thermal ground - mean within window analysed
dat_all_PeerJ	tmedian	estimate of thermal ground - median within window analysed
dat_all_PeerJ	tsd	estimate of thermal ground - sd within window analysed
dat_all_PeerJ	tmax	estimate of thermal ground - maximum within window analysed
dat_all_PeerJ	tmin	estimate of thermal ground - minimum within window analysed
dat_all_PeerJ	tn	number of pixels within window analysed for estimate of thermal ground
dat_all_PeerJ	tav1	estimate of thermal ground - mean within usable datafile user defined window
dat_all_PeerJ	tmedian1	estimate of thermal ground - median within usable datafile user defined window
dat_all_PeerJ	tsd1	estimate of thermal ground - sd within usable datafile user defined window
dat_all_PeerJ	tmax1	estimate of thermal ground - maximum within usable datafile user defined window
dat_all_PeerJ	tmin1	estimate of thermal ground - minimum within usable datafile user defined window
dat_all_PeerJ	tn1	number of pixels analysed for estimate of thermal ground across user defined window (drawn to cover the entire file with usable data)
dat_all_PeerJ	file_nhe	name of image file for FCover estimate
dat_all_PeerJ	FCover	Frational vegetation cover estimate
dat_all_PeerJ	Vegetation	Habitat type detail 1
dat_all_PeerJ	Habitat	Habitat type
hemi_results_meanValues	plots	name of plot containing the thresholded images
hemi_results_meanValues	folder	name of plot sampled
hemi_results_meanValues	FCO	mean Fractional vegetation cover (%) at plot level
hemi_results_meanValues	FCOsd	sd of Fractional vegetation cover (%) at plot level
hemi_results_meanValues	LAIt	true leaf area index
hemi_results_meanValues	LAIe	effective leaf area index
hemi_results_meanValues	ALAt	Average Leaf Inclination Angle for true lai
hemi_results_meanValues	ALAe	Average Leaf Inclination Angle for effective lai
hemi_results_meanValues	fapar_meas_direct	fraction of absorbed photosynthetically active radiation - direct measured
hemi_results_meanValues	fapar_mod_direct	fraction of absorbed photosynthetically active radiation - direct modelled
hemi_results_meanValues	fapar_meas_diffuse	fraction of absorbed photosynthetically active radiation - diffuse measured
hemi_results_meanValues	fapar_mod_diffuse	fraction of absorbed photosynthetically active radiation - diffuse modelled
SensorData_overview	PlotID	name of plot sampled
SensorData_overview	Plot_Type	sample objective
SensorData_overview	SiteID	name of site sampled
SensorData_overview	GPS	number of gps point as stored in gps device
SensorData_overview	Latitude_Geo	geographic latitude wgs84
SensorData_overview	Longitude_Geo	geographic longitude wgs85
SensorData_overview	Elevation	elevation in m asl
SensorData_overview	Transect	name of transect
SensorData_overview	Year	year of measurement
SensorData_overview	Month	month of measurement
SensorData_overview	Day	day of measurement
SensorData_overview	SoilT	soil temperature estimate from plot
SensorData_overview	AirT	air temperature estimate from plot
SensorData_overview	NDVI_Ground	ndvi ground measured
SensorData_overview	NDVI_Sky	ndvi sky measured
SensorData_overview	Hemis	hemispherical images acquired
SensorData_overview	Thermal	thermal images acquired
SensorData_overview	NDVI_Leaf	ndvi data from leaves
SensorData_overview	NDVI_Side	ndvi data from side of plant
SensorData_overview	Sensor notes
SensorData_overview	NDVI calibration	calibration file from plot directly
SensorData_overview	Vegetation_Type	Habitat type detail 1
SensorData_overview	Biome	Habitat type
SensorData_overview	PlotPic	picture of plot taken
SensorData_overview	SampleType	sample type (plot, random)
SensorData_overview	SampleDim	dimensions of plot
lai_extract_spectex	Coastal	Landsat band 1 data
lai_extract_spectex	Blue	Landsat band 2 data
lai_extract_spectex	Green	Landsat band 3 data
lai_extract_spectex	Red	Landsat band 4 data
lai_extract_spectex	NearIR	Landsat band 5 data
lai_extract_spectex	SWIR1	Landsat band 6 data
lai_extract_spectex	SWIR2	Landsat band 7 data
lai_extract_spectex	NDVI	Normalised difference Vegetation Index
lai_extract_spectex	MSAVI	Modified Soil adjusted vegetation index
lai_extract_spectex	TWI	Terrain wetness index
lai_extract_spectex	REDD	dissmilarity texture of red band (band 4)
lai_extract_spectex	NIRD	dissimilarity texture of near infrared band (band 5)
lai_extract_spectex	SWIRD	dissimilarity texture of short wave infrared band (band 6)
lai_extract_spectex	REDM	mean texture of red band (band 4)
lai_extract_spectex	NIRM	mean texture of near infrared band (band 5)
lai_extract_spectex	SWIRM	mean texture of short wave infrared band (band 6)
lai_extract_spectex	NDVIMFocal	mean of ndvi within focal window
lai_extract_spectex	NDVISD	sd of ndvi within focal window
lai_extract_spectex	Plot	plot name
lai_extract_spectex	Year	year of measurement
lai_extract_spectex	Hemi	how many points per sample
lai_extract_spectex	LAI	value of true leaf area index
lai_extract_spectex	Fcover	value of mean fractional vegetation cover
lai_extract_spectex	Biome	Habitat type detail 1
lai_extract_spectex	Habitat	habitat type
